# Supplementary material for: TsOH-catalyzed acyl migration reaction of the Bz-group: innovative assembly of various building blocks for the synthesis of saccharides
Source: Royal Society of Chemistry journal article supplement (doi:10.1039/d2ob02052a), 2023-01-01
Supplement: d2ob02052a1.pdf [file d2ob02052a1.pdf]

## Supporting Information

### TsOH-Catalyzed Acyl Migration Reaction of Bz-group: Innovative Assembly of Various Building Blocks for the Synthesis of Saccharides

Xing-Yong Liang\*<sup>a</sup>; An-Lin Liu<sup>a</sup>; Hua-Jun Shawn Fan<sup>a</sup>; Lei Wang<sup>a</sup>; Zhi-Ning Xu<sup>a</sup>;  
Xin-Gang Ding<sup>a</sup>; Bo-Shun Huang\*<sup>b</sup>.

<sup>a</sup>School of Chemistry Engineering, Sichuan University of Science & Engineering,  
Zigong 643000, China

<sup>b</sup>Division of Chemistry and Chemical Engineering, California Institute of Technology  
and Howard Hughes Medical Institute, 1200 East California Boulevard, Pasadena,  
California 91125, United States

#### NMR spectra of products

|                                                                                                                                                                  |    |
|------------------------------------------------------------------------------------------------------------------------------------------------------------------|----|
| Tolyl 2,3,6- <i>tri-O</i> -benzoyl-1-thio- $\beta$ -D-galactofuranoside (2) and Tolyl 2,3,5- <i>tri-O</i> -benzoyl-1-thio- $\beta$ -D-galactofuranoside (3)..... | 3  |
| Tolyl 6- <i>O</i> -trityl-5- <i>O</i> -acetyl-2,3- <i>di-O</i> -benzoyl-1- <i>thio</i> - $\beta$ -D-galactofuranoside (5a) .....                                 | 7  |
| Tolyl 6- <i>O</i> -trityl-5- <i>O</i> -pivaloyl-2,3- <i>di-O</i> -benzoyl-1- <i>thio</i> - $\beta$ -D-galactofuranoside (5b) .....                               | 9  |
| Tolyl 6- <i>O</i> -trityl-5- <i>O</i> - <i>p</i> -nitrobenzoyl-2,3- <i>di-O</i> -benzoyl-1- <i>thio</i> - $\beta$ -D-galactofuranoside (5c) ...                  | 11 |
| Tolyl 6- <i>O</i> -trityl-5- <i>O</i> - <i>p</i> -methoxybenzoyl-2,3- <i>di-O</i> -benzoyl-1- <i>thio</i> - $\beta$ -D-galactofuranoside (5d)<br>.....           | 13 |
| Tolyl 2,3- <i>di-O</i> -benzoyl-6- <i>O</i> -acetyl-1- <i>thio</i> - $\beta$ -D-galactofuranoside (7a).....                                                      | 15 |
| Tolyl 6- <i>O</i> -pivaloyl-2,3- <i>di-O</i> -benzoyl-1- <i>thio</i> - $\beta$ -D-galactofuranoside (7b).....                                                    | 17 |
| Tolyl 6- <i>O</i> - <i>p</i> -nitrobenzoyl-2,3- <i>di-O</i> -benzoyl-1- <i>thio</i> - $\beta$ -D-galactofuranoside (7c).....                                     | 19 |
| Tolyl 6- <i>O</i> - <i>p</i> -methoxybenzoyl-2,3- <i>di-O</i> -benzoyl-1- <i>thio</i> - $\beta$ -D-galactofuranoside (7d) .....                                  | 21 |
| 2-Hydroxy-2-phenylethyl benzoate (10a) .....                                                                                                                     | 23 |
| 2-Hydroxy-3-phenoxypropyl benzoate (10b).....                                                                                                                    | 25 |
| Methyl 2,3,6- <i>tri-O</i> -benzoyl- $\beta$ -D-galactofuranoside (10c) .....                                                                                    | 27 |
| 1,2- <i>O</i> -Isopropylidene-6- <i>O</i> -benzoyl-3- <i>O</i> -benzyl- $\alpha$ -D-glucofuranose (10d).....                                                     | 29 |

|                                                                                                                                                                                                                                                                                                                     |    |
|---------------------------------------------------------------------------------------------------------------------------------------------------------------------------------------------------------------------------------------------------------------------------------------------------------------------|----|
| Tolyl 2,3,4- <i>tri-O</i> -benzoyl-1- <i>thio-β</i> -D-galactopyranoside (9e), Tolyl 2,3,6- <i>tri-O</i> -benzoyl-1- <i>thio-β</i> -D-galactopyranoside (10e) and Tolyl 2,4,6- <i>tri-O</i> -benzoyl-1- <i>thio-β</i> -D-galactopyranoside (10e')                                                                   | 31 |
| Methyl 2,3,6- <i>tri-O</i> -benzoyl- $\alpha$ -D-galactopyranoside (10f)                                                                                                                                                                                                                                            | 37 |
| 1,2- <i>O,O</i> -Isopropylidene-5- <i>O</i> -benzoyl- $\alpha$ -D-xylofuranose (10g)                                                                                                                                                                                                                                | 39 |
| Methyl 2,3,6- <i>tri-O</i> -benzoyl- $\alpha$ -D-mannopyranoside (10h)                                                                                                                                                                                                                                              | 41 |
| methyl 2,3,4- <i>tri-O</i> -benzoyl- $\alpha$ -D-glucopyranoside (9i) and Methyl 2,3,6- <i>tri-O</i> -benzoyl- $\alpha$ -D-glucopyranoside (10i)                                                                                                                                                                    | 43 |
| ( $\pm$ )-[(3 <i>aRS</i> ,4 <i>SR</i> ,5 <i>RS</i> ,6 <i>aSR</i> )-5-Hydroxy-2-oxohexahydro-2 <i>H</i> -cyclopenta[ <i>b</i> ]furan-4-yl] methyl benzoate (10j)                                                                                                                                                     | 45 |
| Methyl 2,3- <i>di-O</i> -benzoyl- $\alpha$ -L-arabinofuranoside (9k)                                                                                                                                                                                                                                                | 47 |
| Tolyl 6- <i>O-tert</i> -butyldiphenylsilyl-2,3- <i>di-O</i> -benzoyl-1- <i>thio-β</i> -D-galactopyranoside (10l)                                                                                                                                                                                                    | 48 |
| Methyl 2,4- <i>di-O</i> -benzoyl- $\alpha$ -L-rhamnopyranoside (10m)                                                                                                                                                                                                                                                | 50 |
| 6- <i>O-tert</i> -Butyldiphenylsilyl-2,3,5- <i>tri-O</i> -benzoyl-1- <i>thio-β</i> -D-galactofuranoside (11)                                                                                                                                                                                                        | 52 |
| Octyl 6- <i>O-tert</i> -butyldiphenylsilyl-2,3,5- <i>tri-O</i> -benzoyl- $\beta$ -D-galactopyranosyl-(1 $\rightarrow$ 6)-2,3,5- <i>tri-O</i> -benzoyl- $\beta$ -D-galactofuranoside (14)                                                                                                                            | 54 |
| Octyl 2,3,5- <i>tri-O</i> -benzoyl- $\beta$ -D-galactopyranosyl-(1 $\rightarrow$ 6)-2,3,5- <i>tri-O</i> -benzoyl- $\beta$ -D-galactofuranoside (15)                                                                                                                                                                 | 56 |
| Octyl 2,3,6- <i>tri-O</i> -benzoyl- $\beta$ -D-galactopyranosyl-(1 $\rightarrow$ 6)-2,3,5- <i>tri-O</i> -benzoyl- $\beta$ -D-galactofuranoside (16)                                                                                                                                                                 | 58 |
| Octyl 2,3,5,6- <i>tetra-O</i> -benzoyl- $\beta$ -D-galactopyranosyl-(1 $\rightarrow$ 6)-2,3,5- <i>tri-O</i> -benzoyl- $\beta$ -D-galactofuranosyl-(1 $\rightarrow$ 5)-2,3,6- <i>tri-O</i> -benzoyl- $\beta$ -D-galactopyranosyl-(1 $\rightarrow$ 6)-2,3,5- <i>tri-O</i> -benzoyl- $\beta$ -D-galactofuranoside (18) | 60 |

Tolyl 2,3,6-tri-O-benzoyl-1-thio-β-D-galactofuranoside (2) and Tolyl 2,3,5-tri-O-benzoyl-1-thio-β-D-galactofuranoside (3)

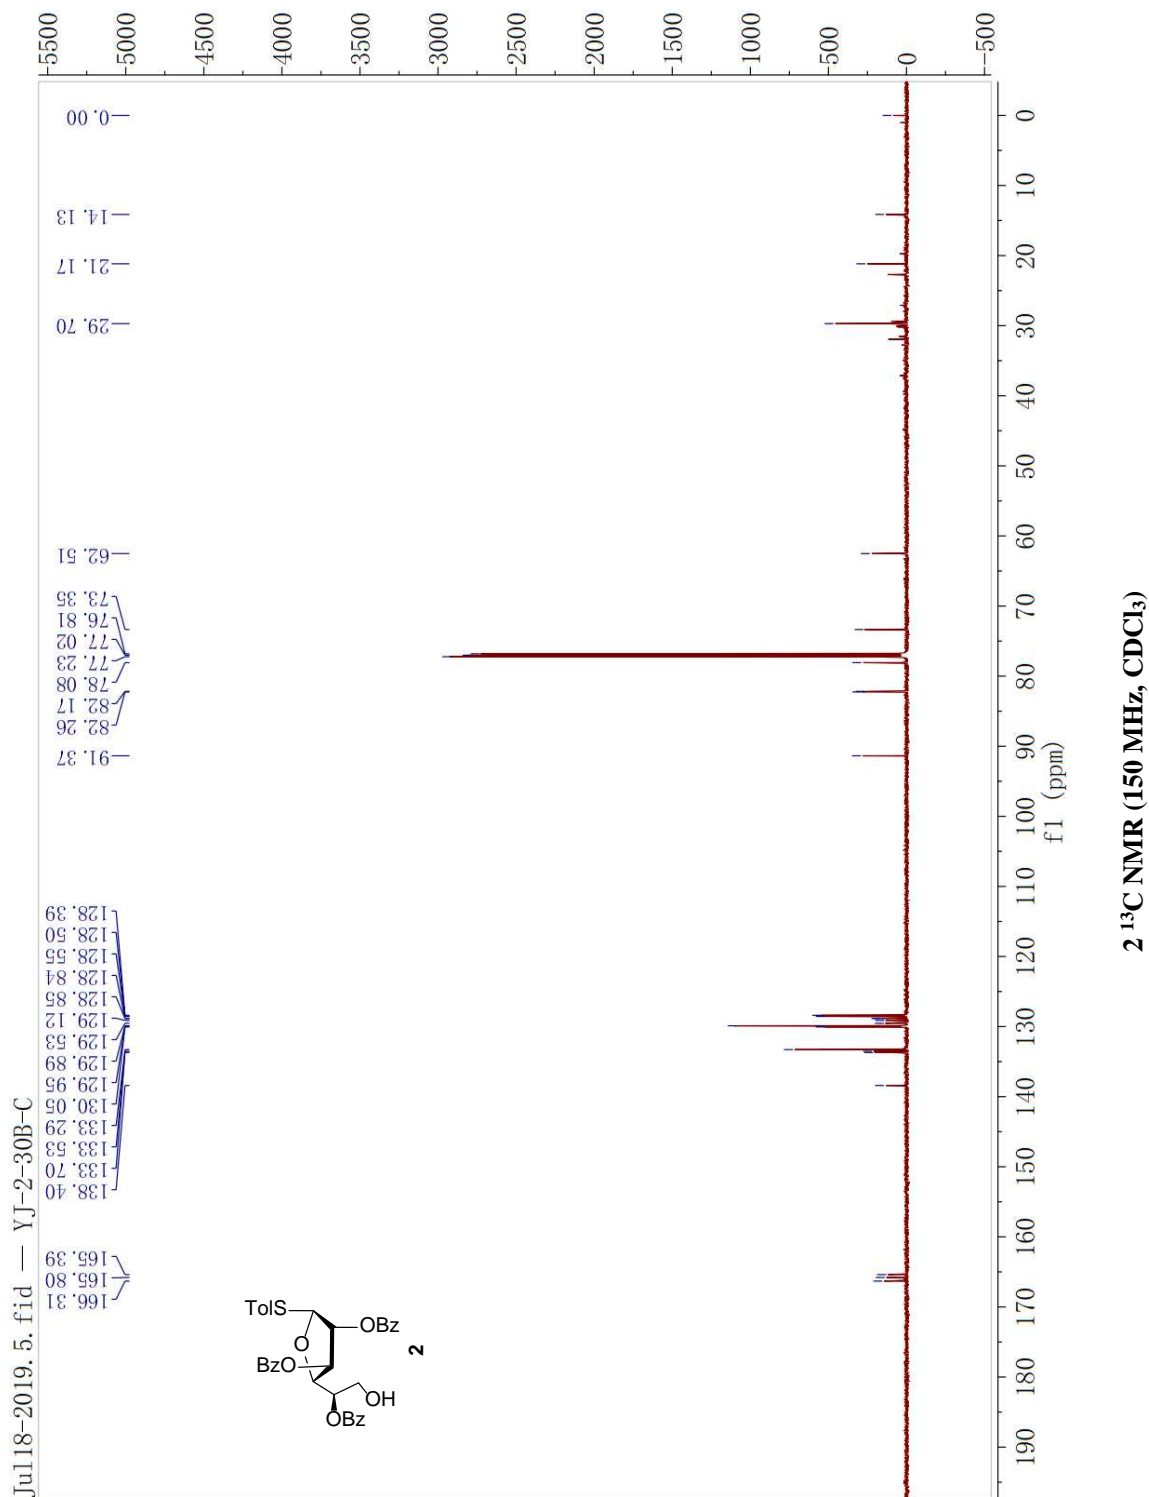

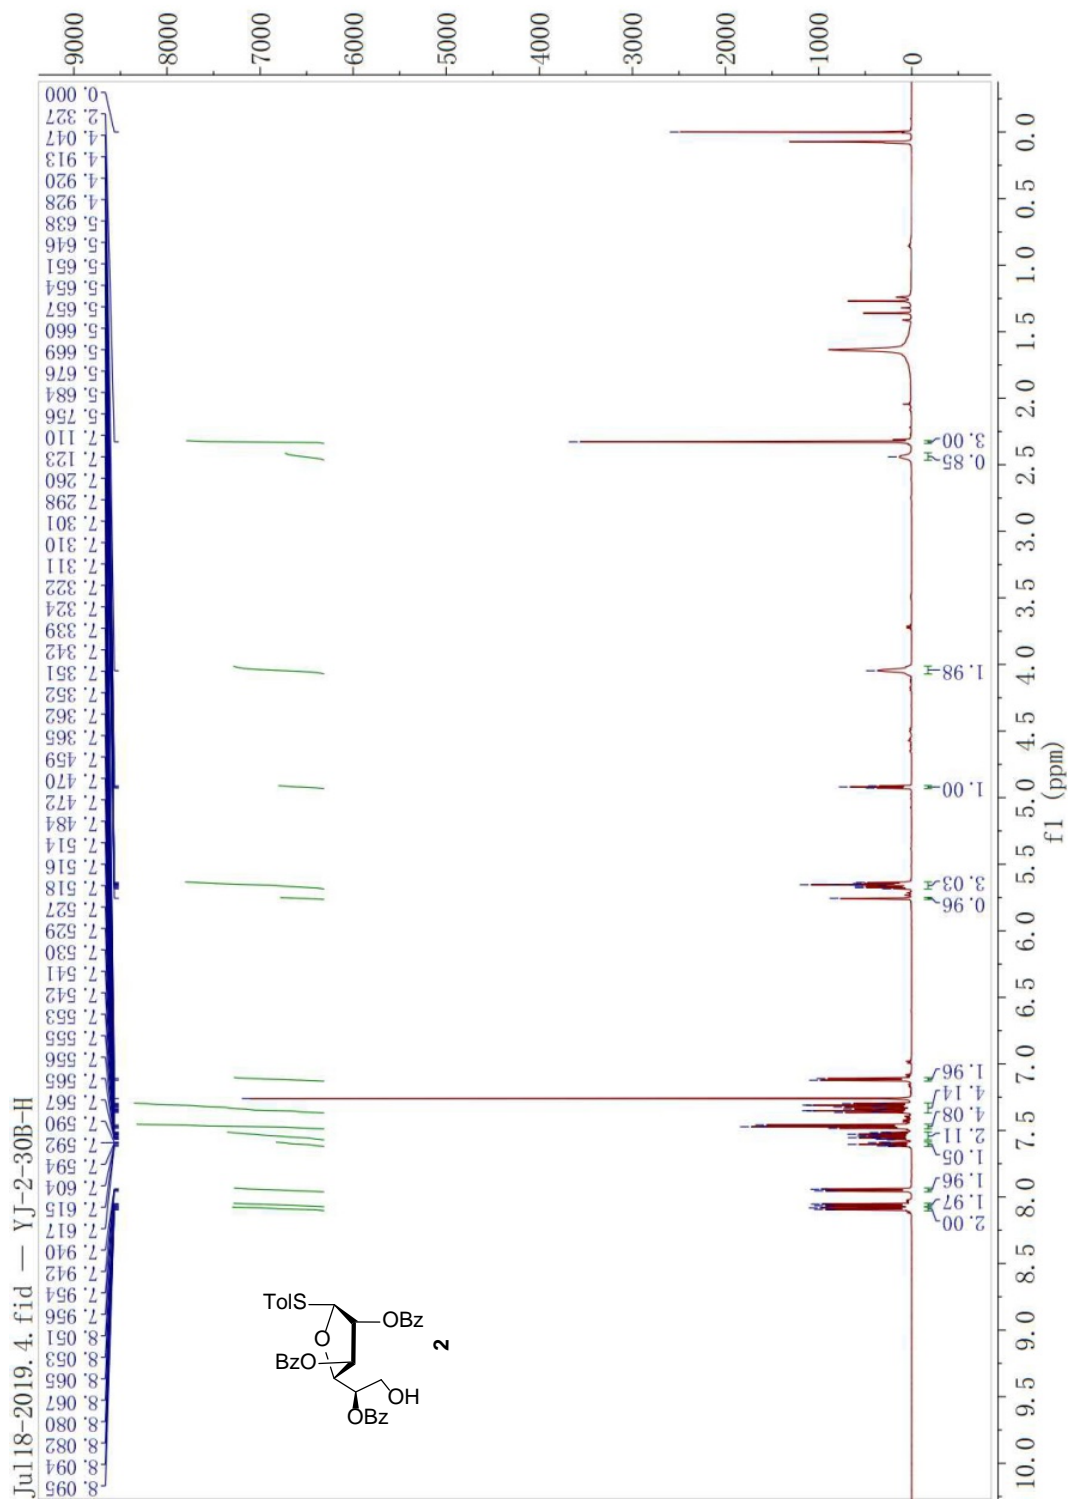

2 <sup>1</sup>H NMR (600 MHz, CDCl<sub>3</sub>)

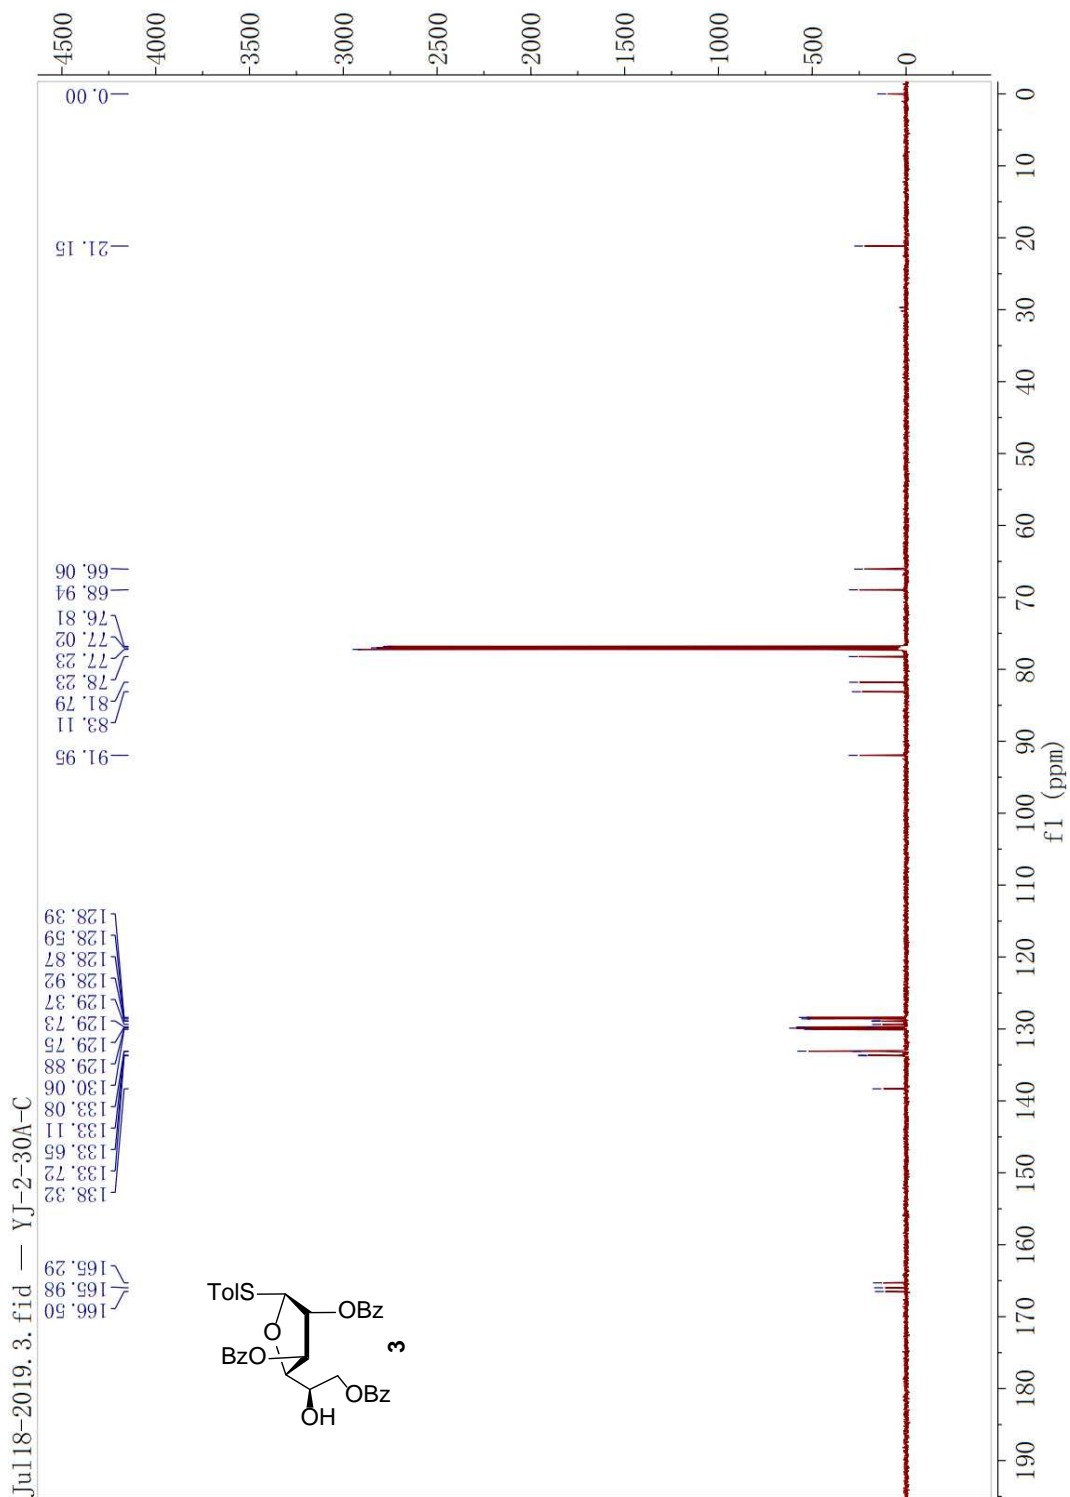

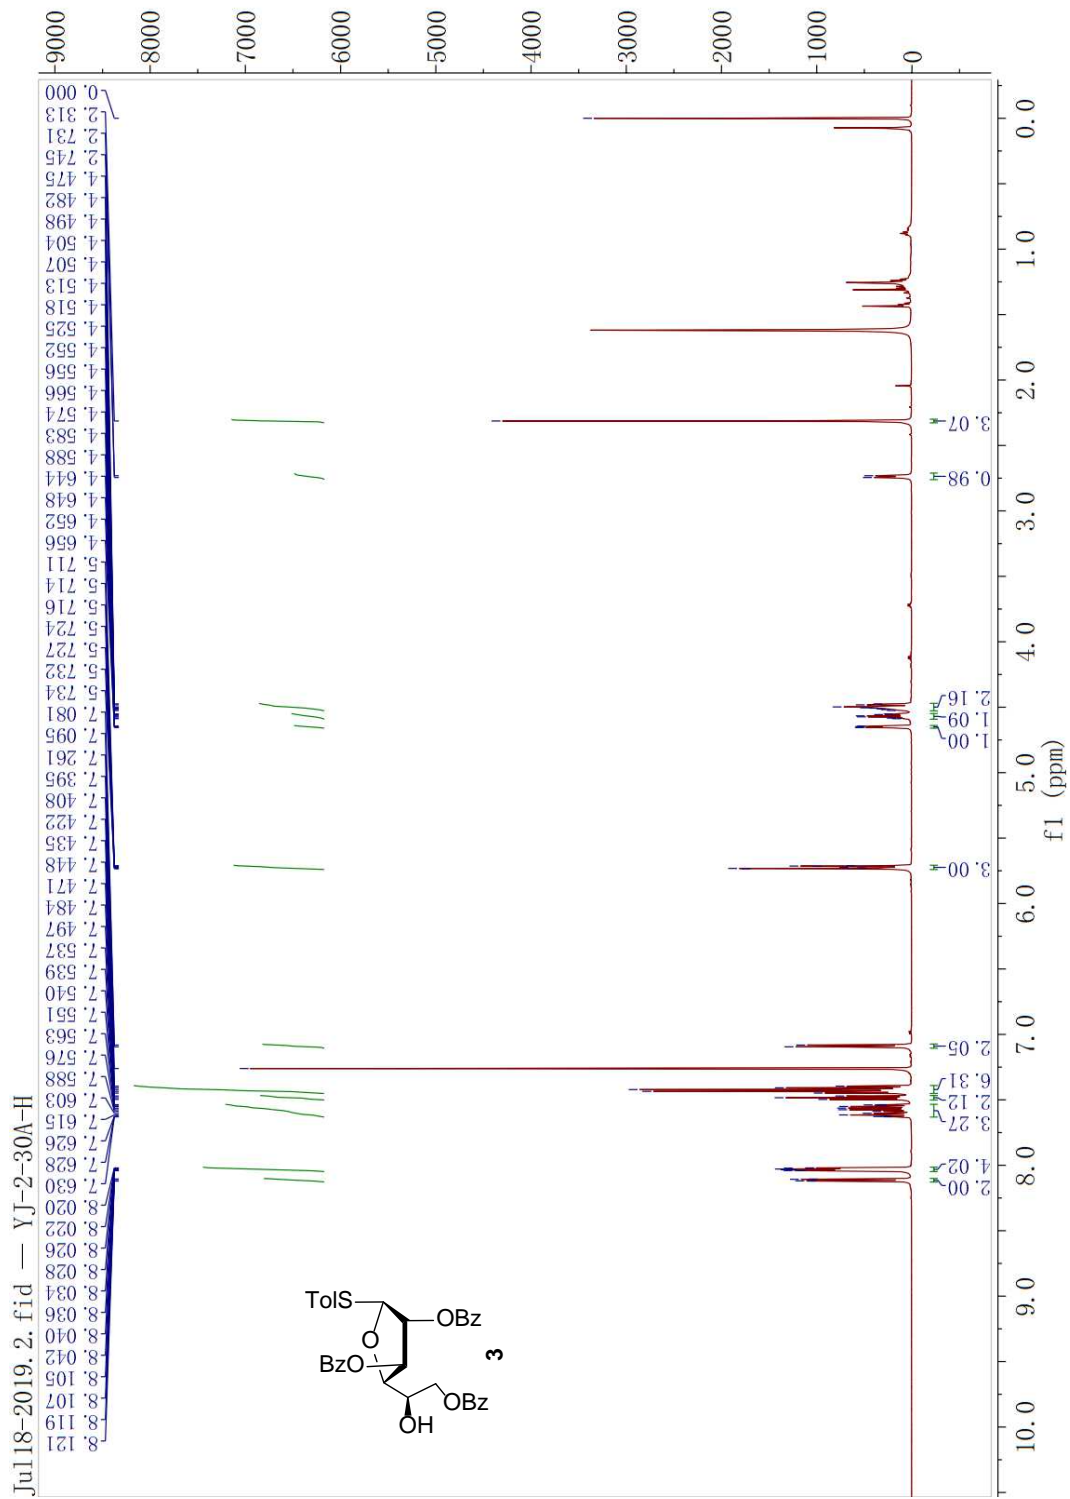

Tolyl 6-O-trityl-5-O-acetyl-2,3-di-O-benzoyl-1-thio-β-D-galactofuranoside (5a)

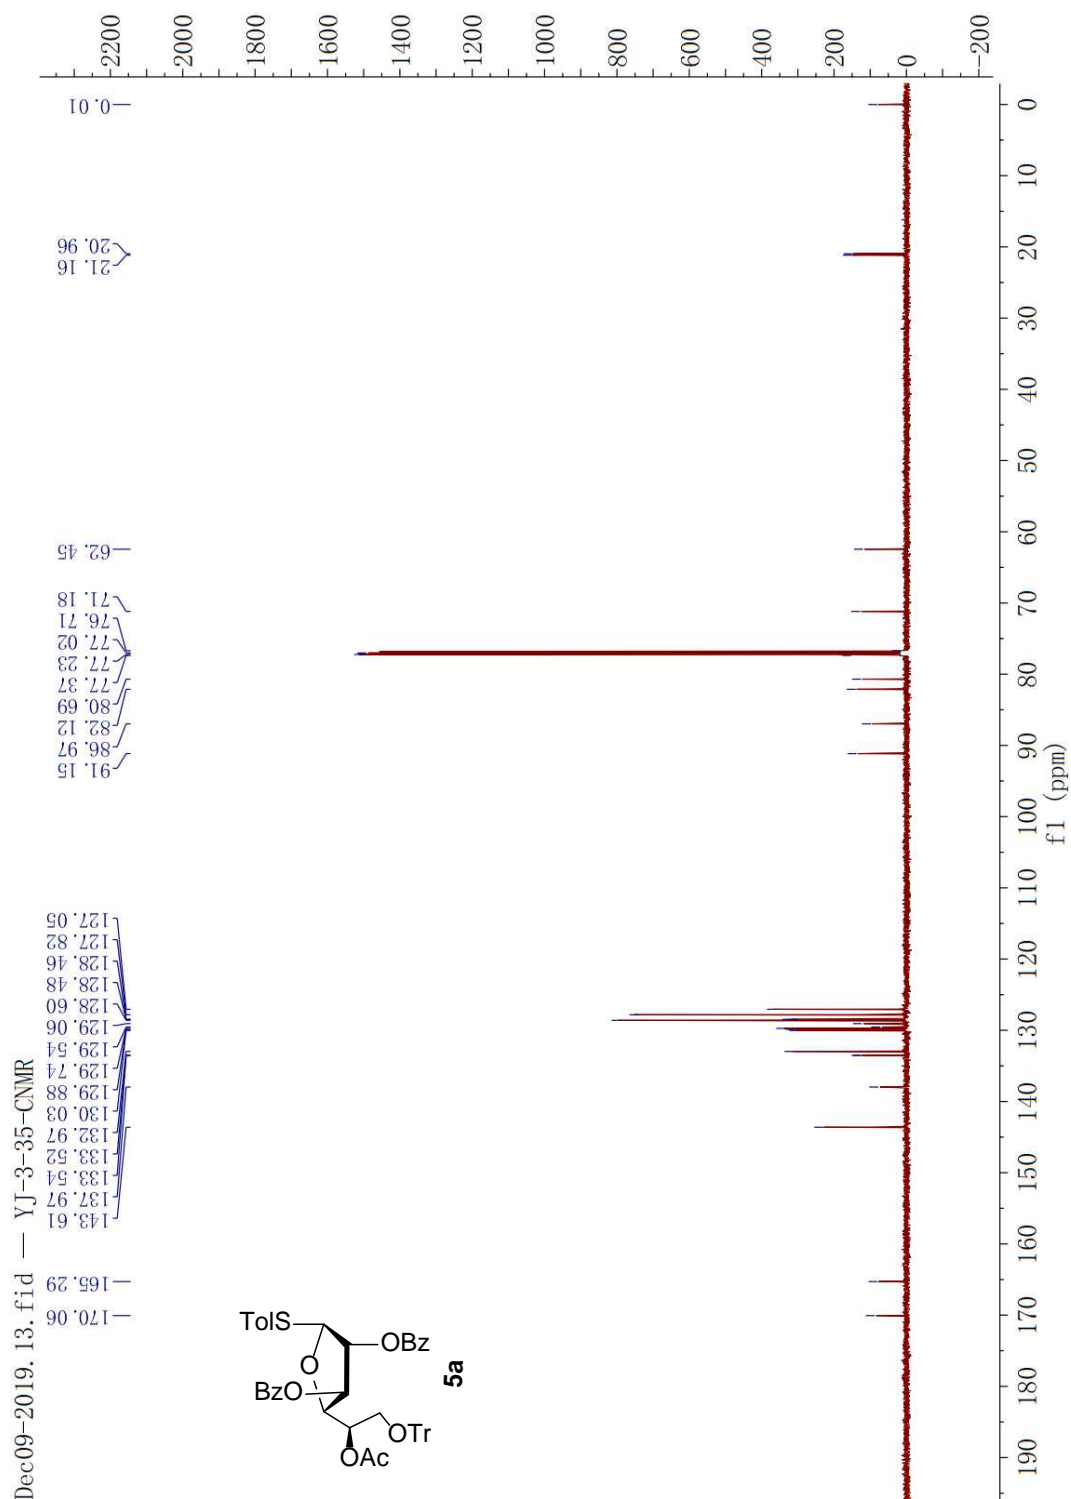

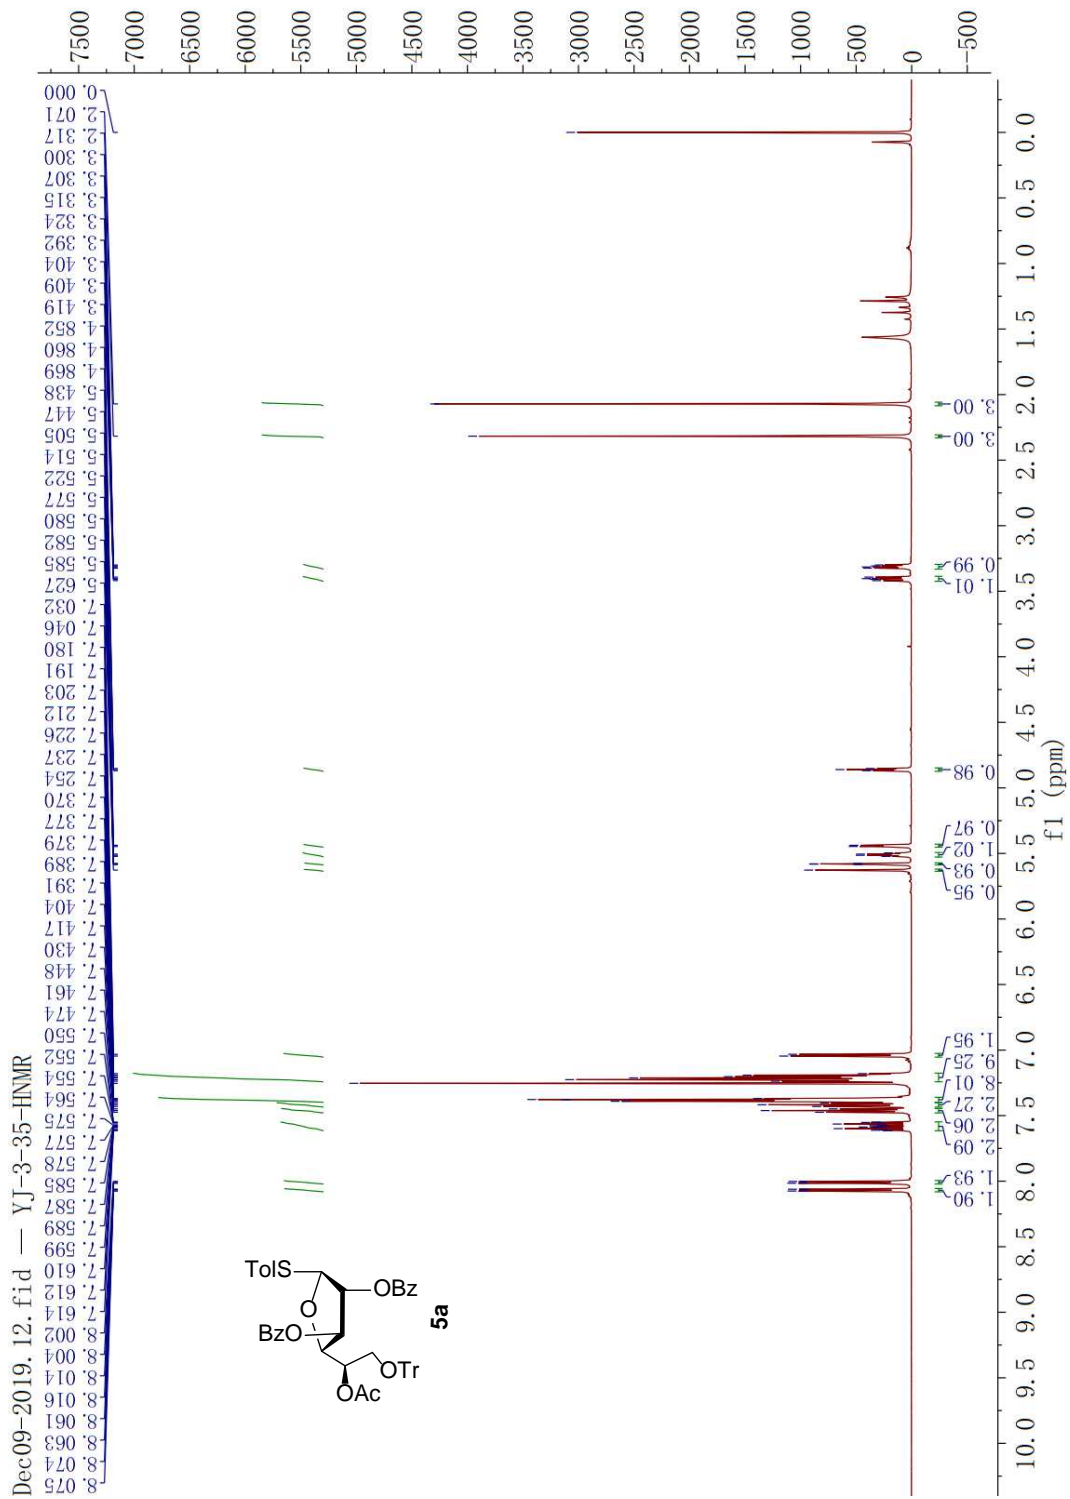

**5a** <sup>1</sup>H NMR (600 MHz, CDCl<sub>3</sub>)



Tolyl 6-O-trityl-5-O-pivaloyl-2,3-di-O-benzoyl-1-thio- $\beta$ -D-galactofuranoside (5b)

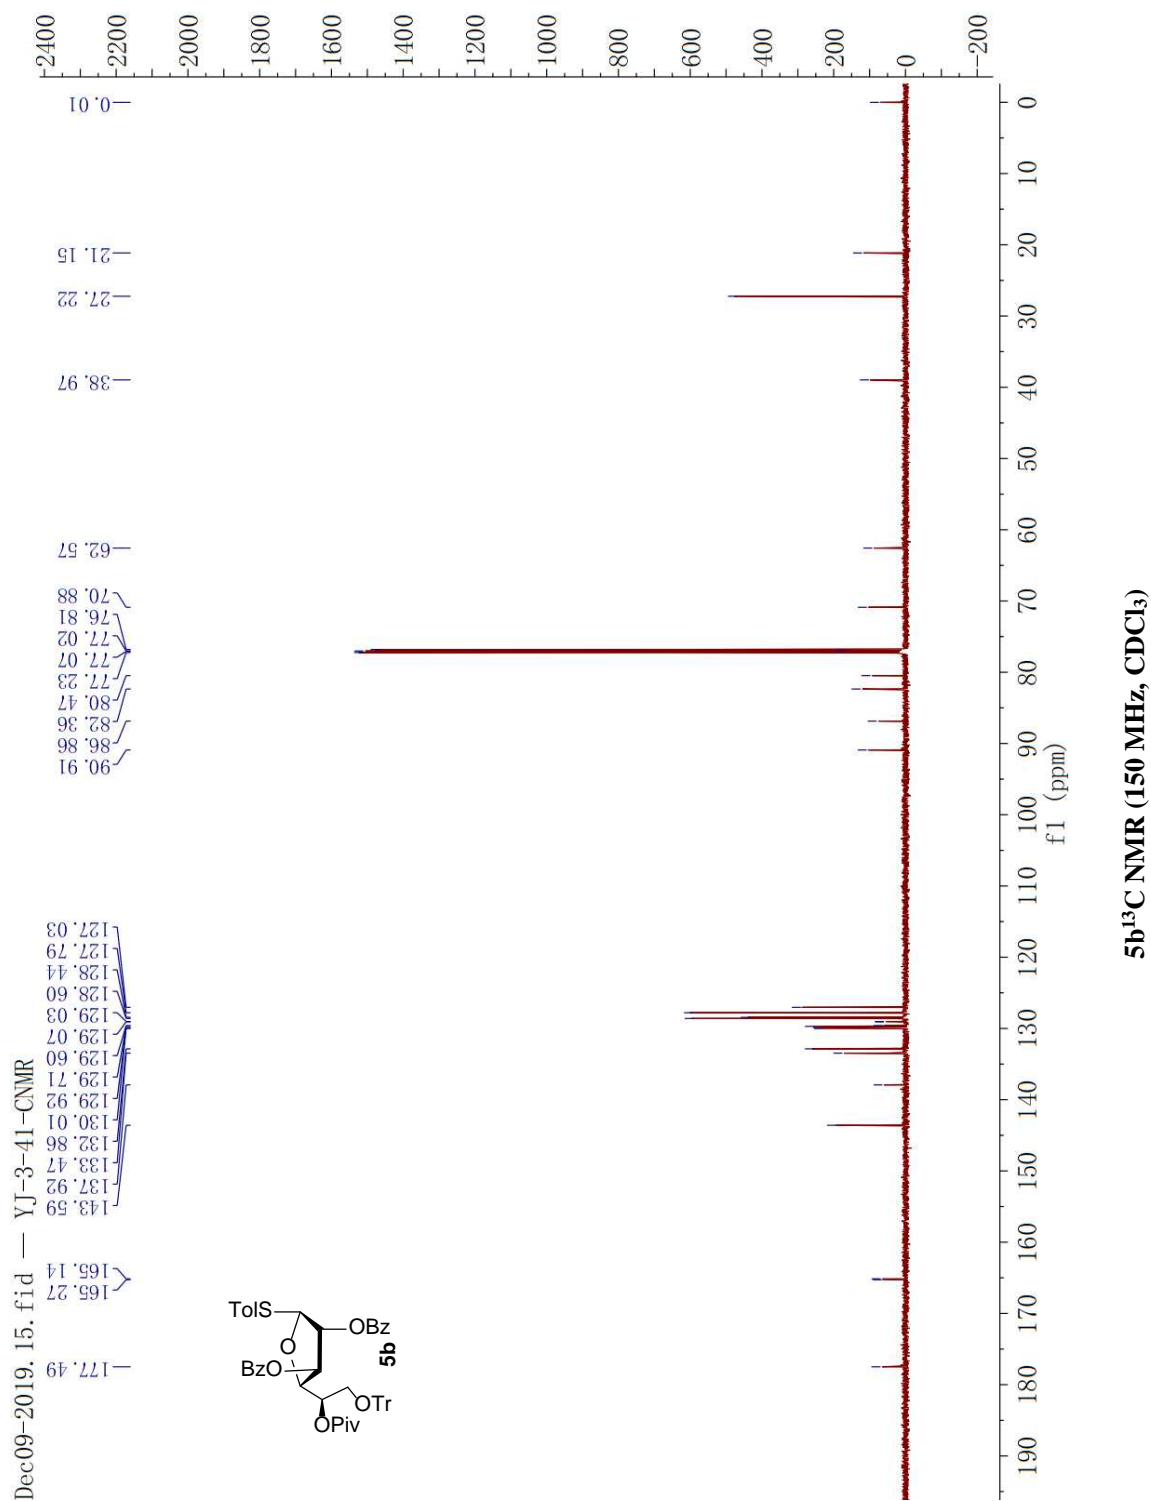

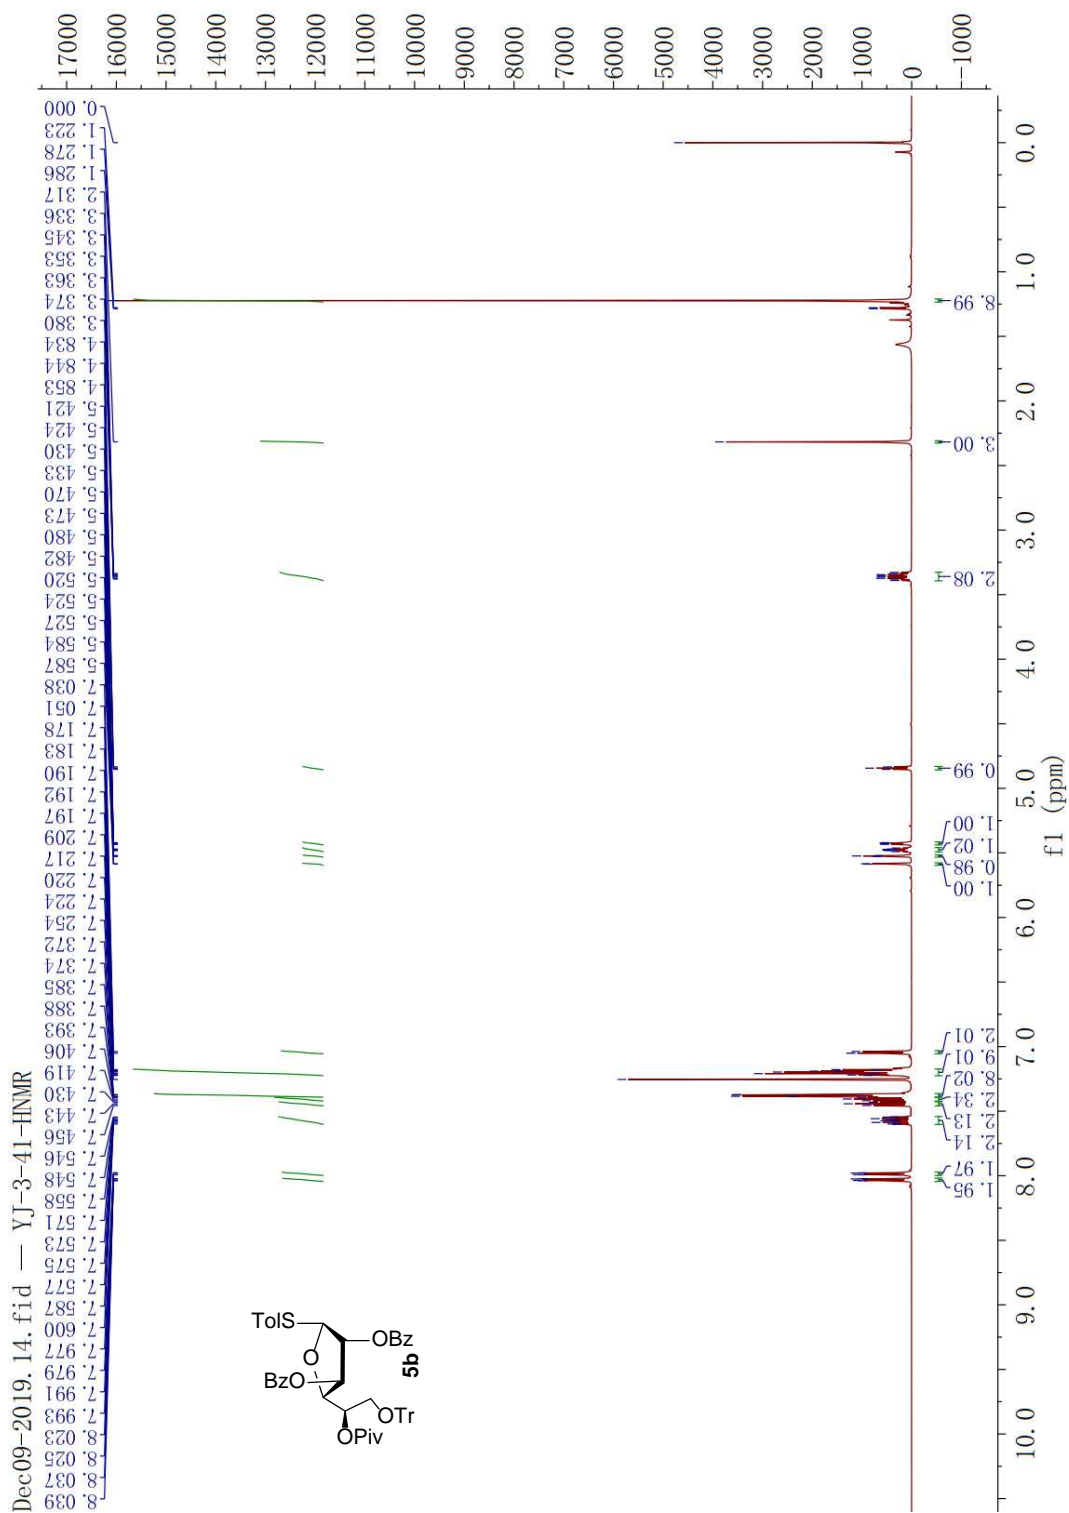

**Tolyl 6-O-trityl-5-O-p-nitrobenzoyl-2,3-di-O-benzoyl-1-thio-β-D-galactofuranoside (5c)**

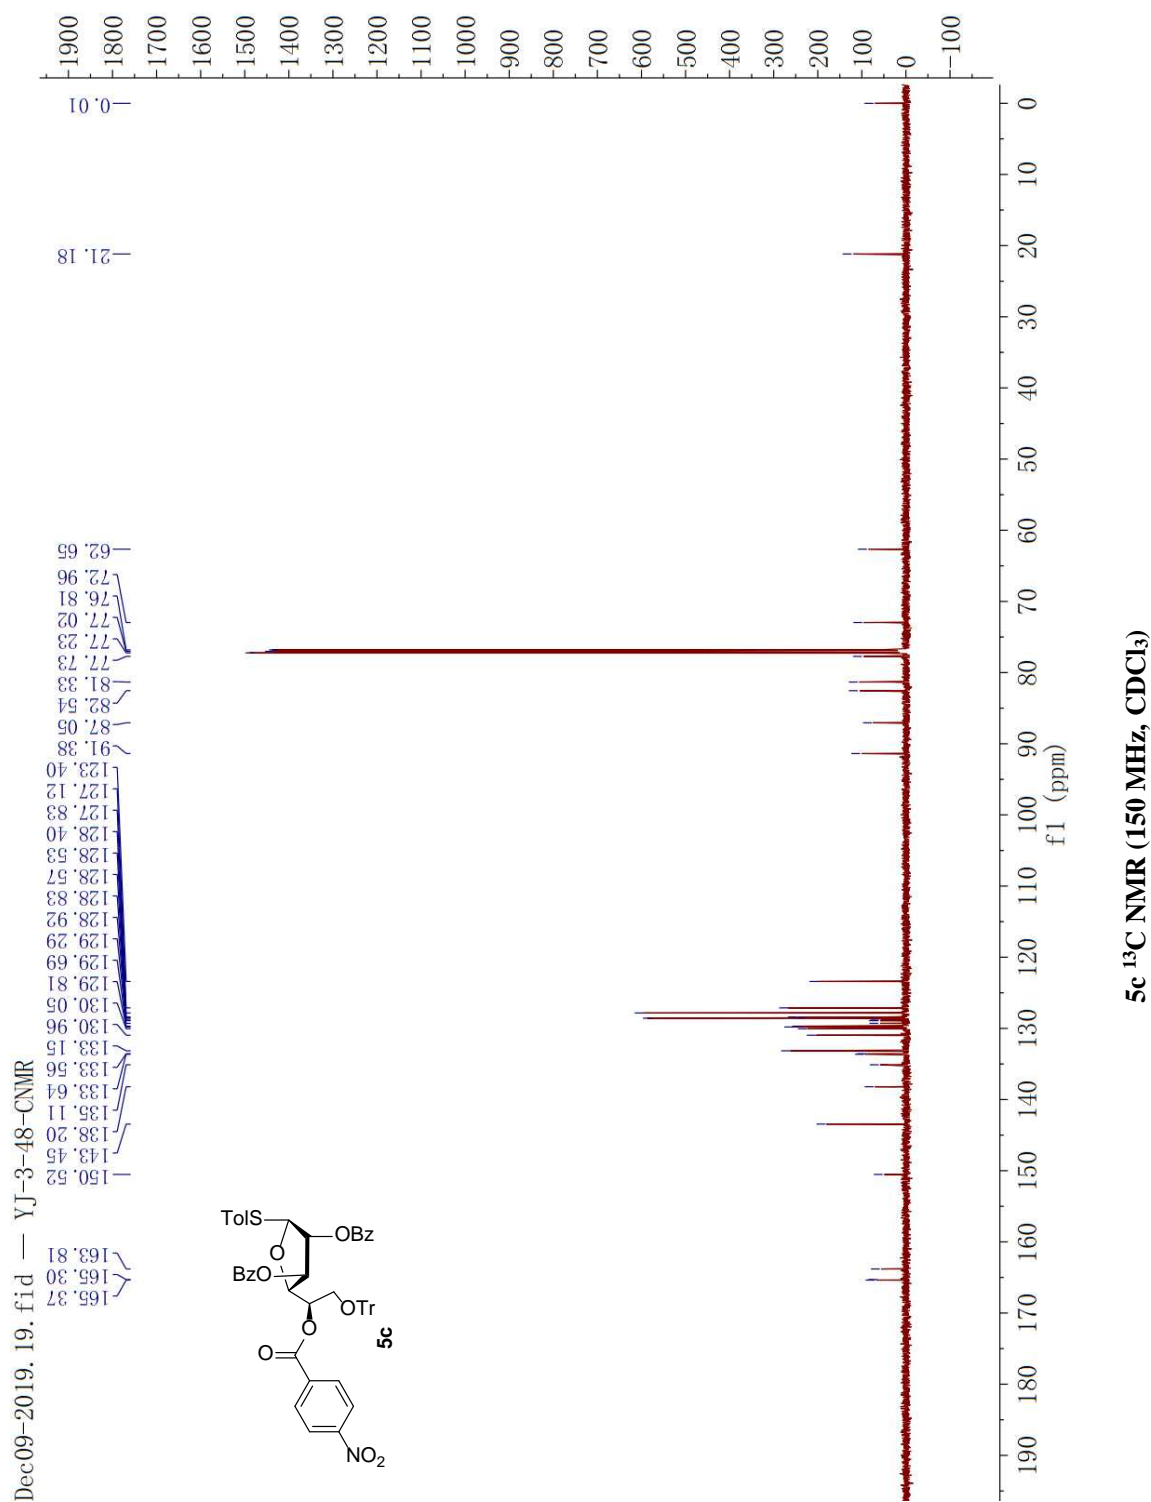



Tolyl **6-O-trityl-5-O-p-methoxybenzoyl-2,3-di-O-benzoyl-1-thio-β-D-galactofuranoside (5d)**

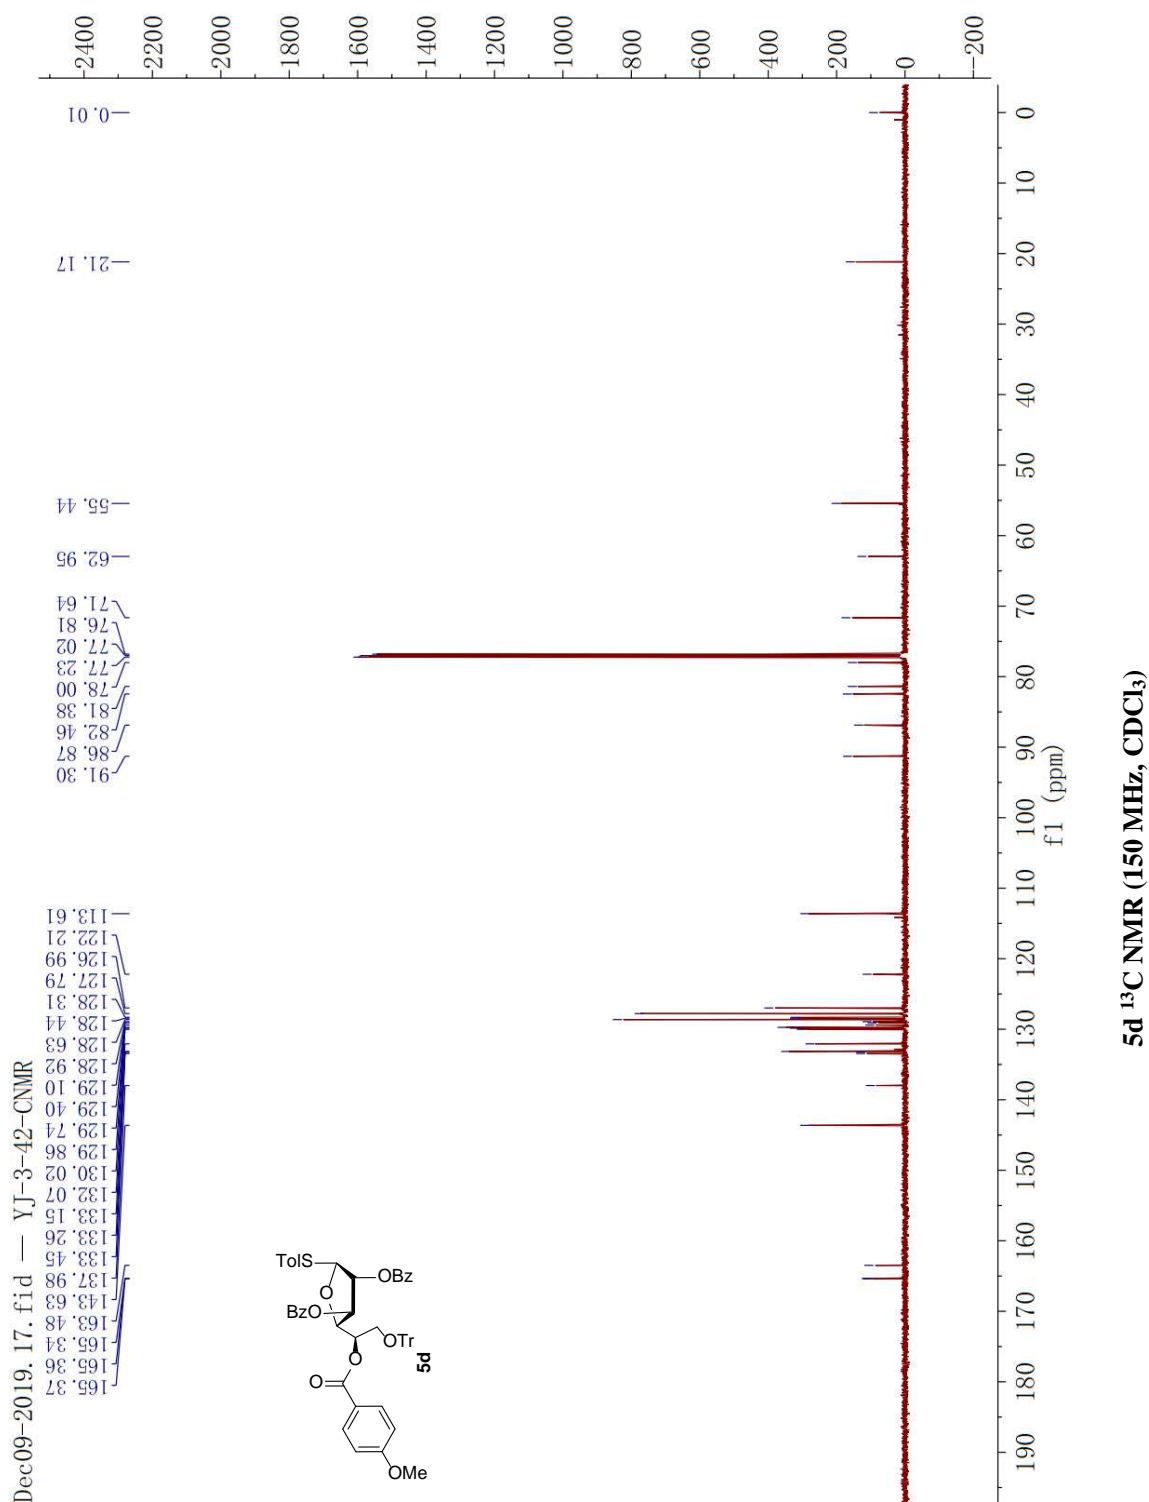

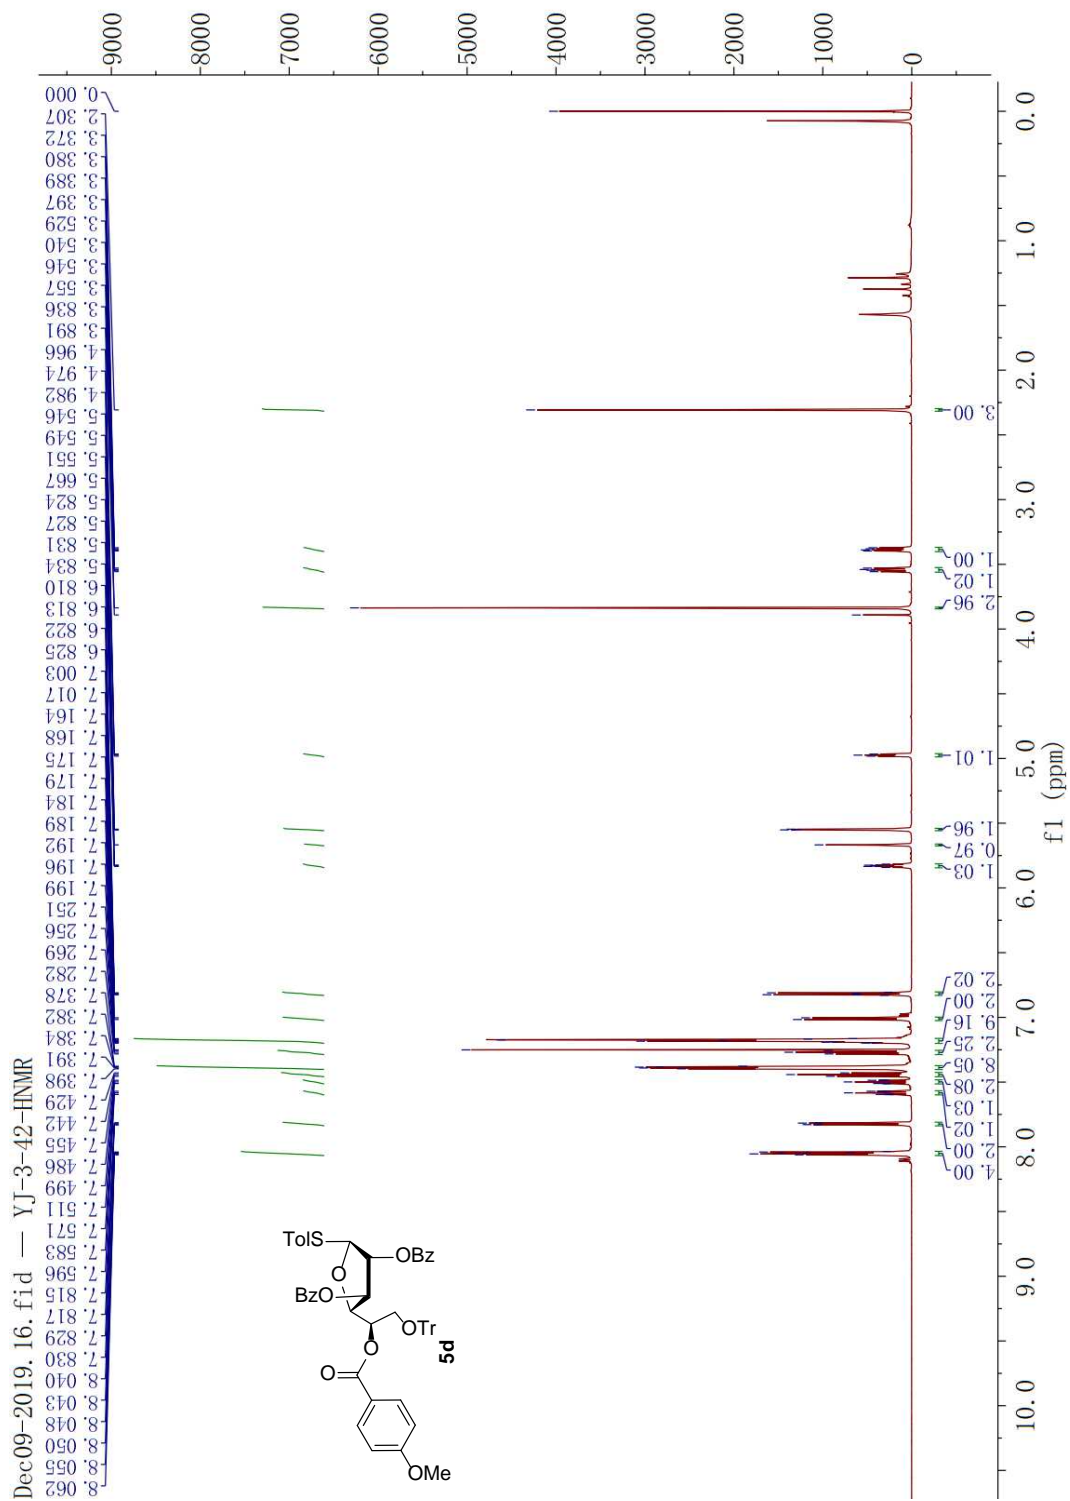

**5d** <sup>1</sup>H NMR (600 MHz, CDCl<sub>3</sub>)

Tolyl 2,3-di-O-benzoyl-6-O-acetyl-1-thio-β-D-galactofuranoside (7a)

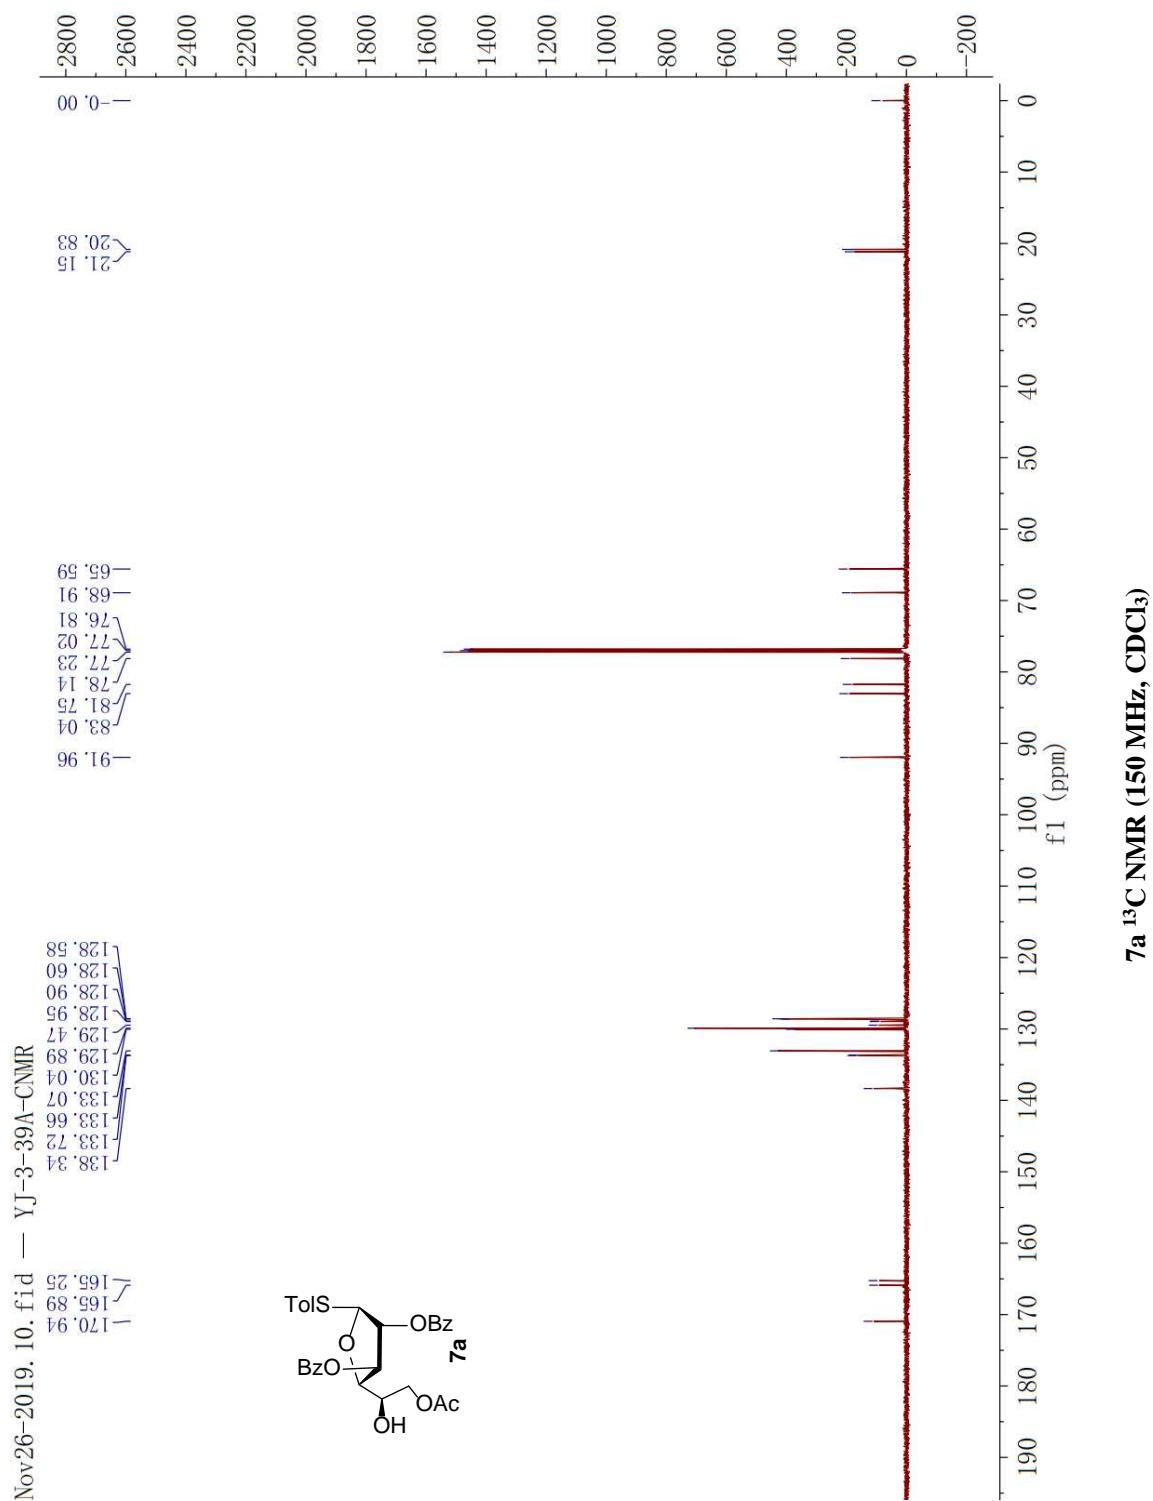

Nov26-2019.9.fid — YJ-3-39A

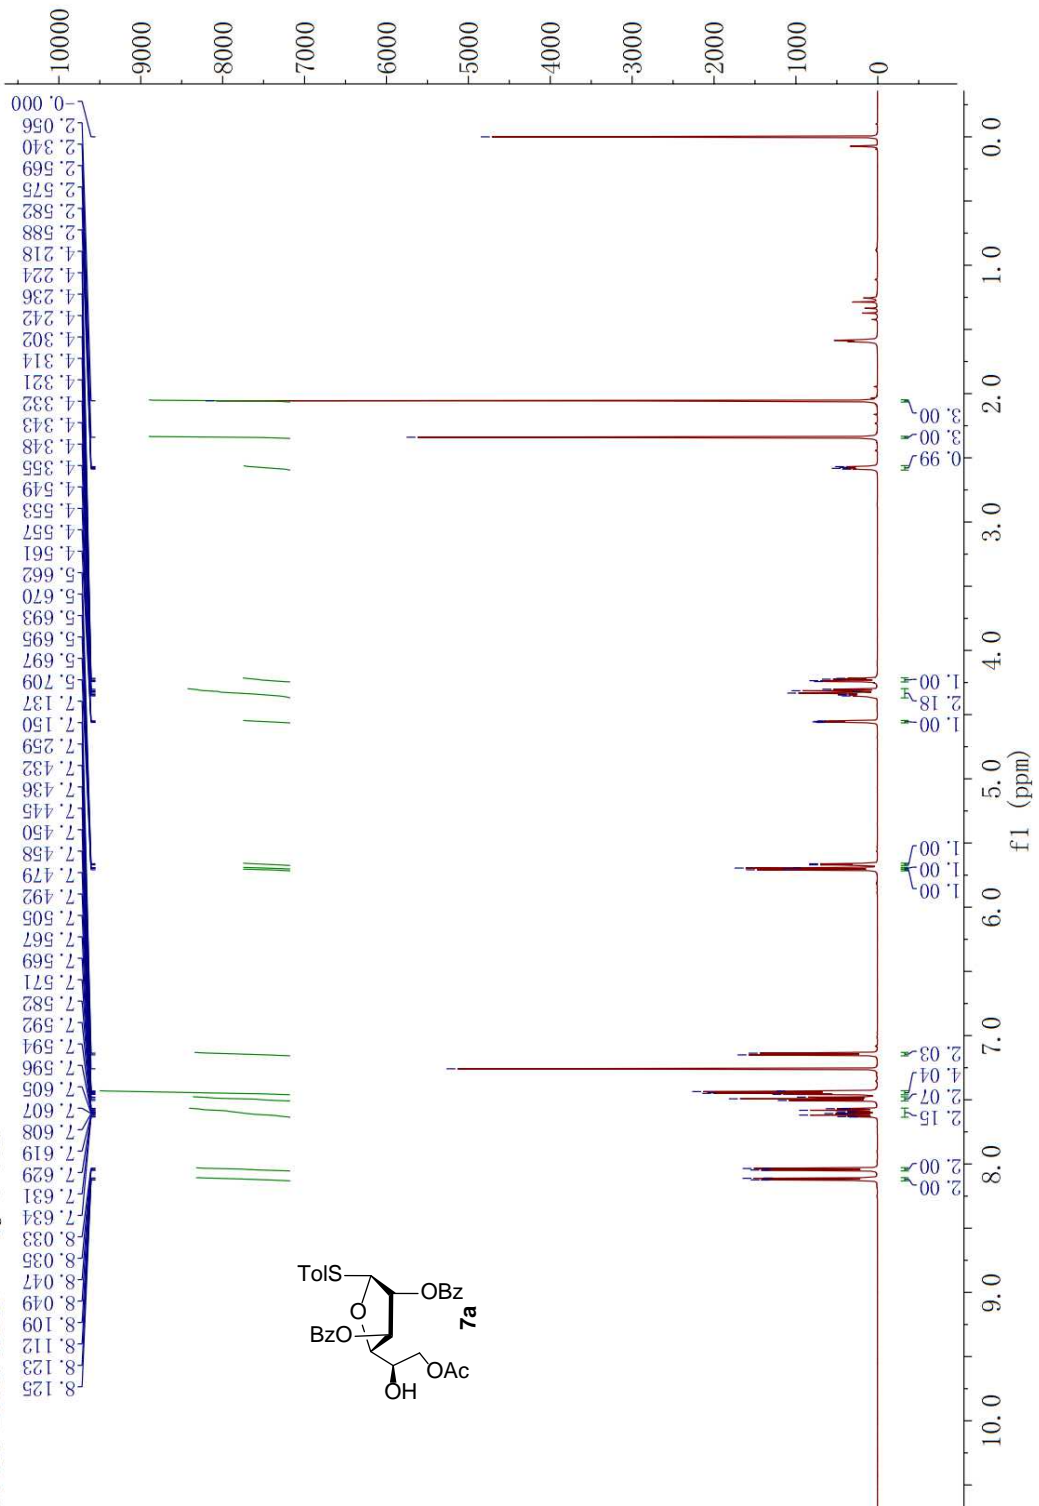



**Tolyl 6-O-pivaloyl-2,3-di-O-benzoyl-1-thio-β-D-galactofuranoside (7b)**

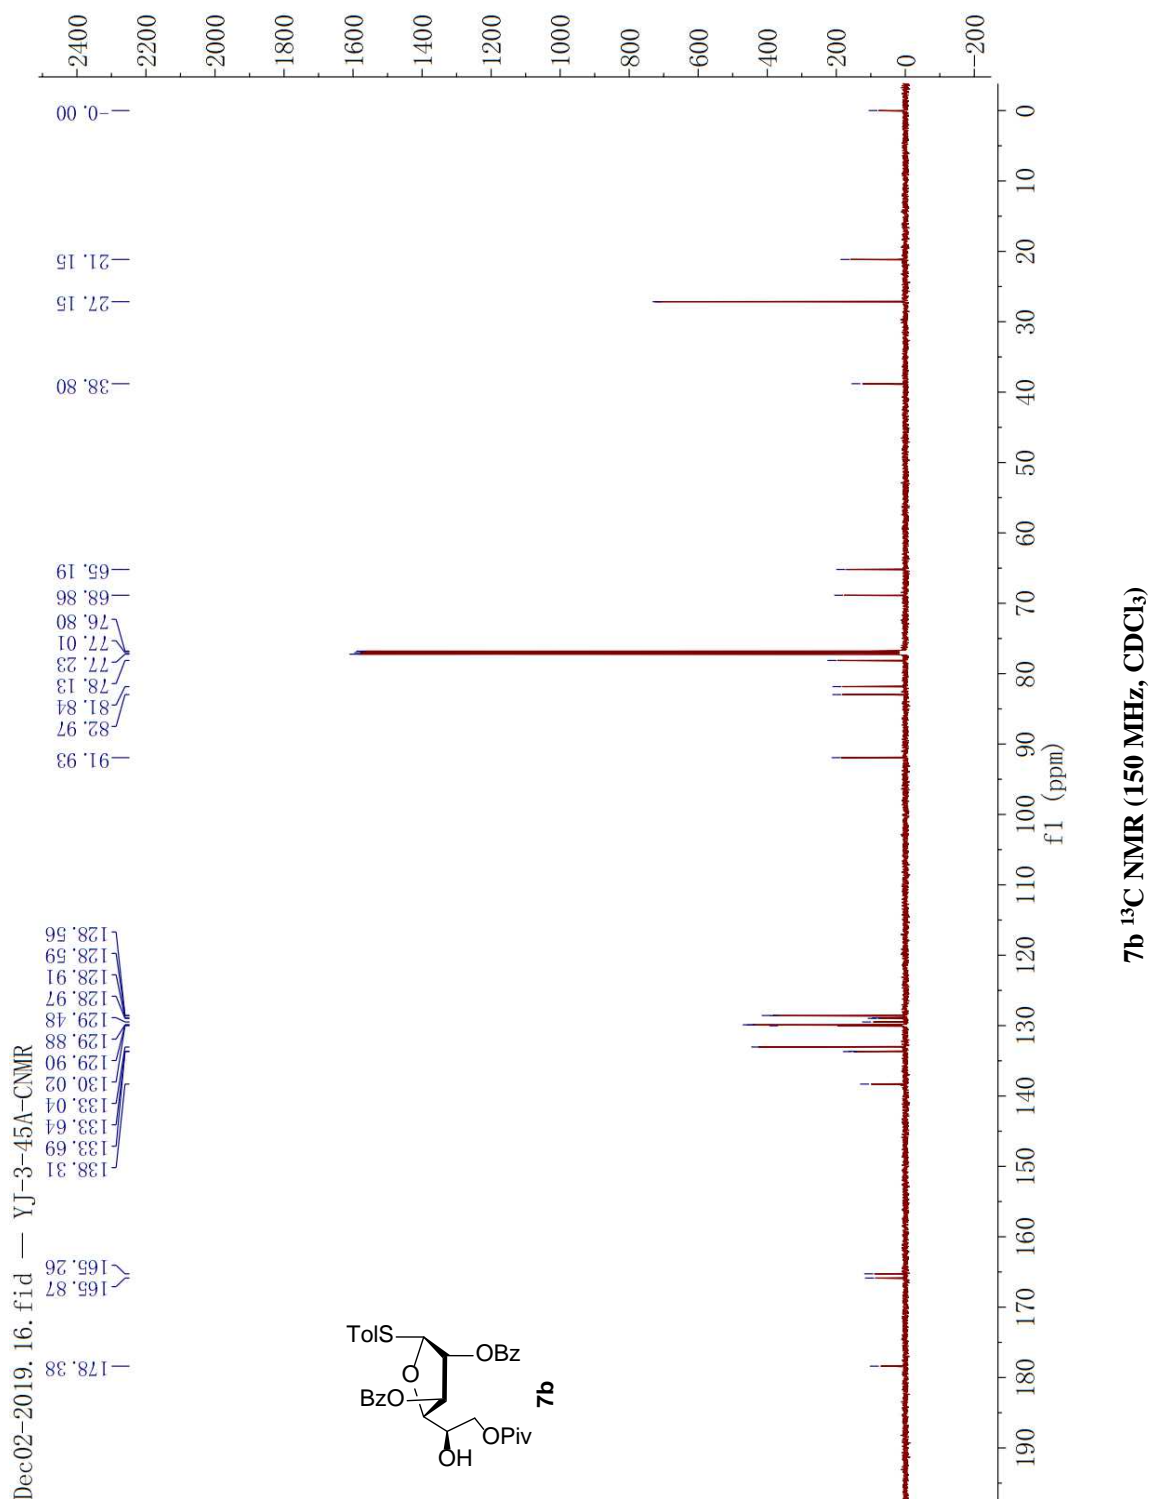

Dec02-2019.15.fid — YJ-3-45A

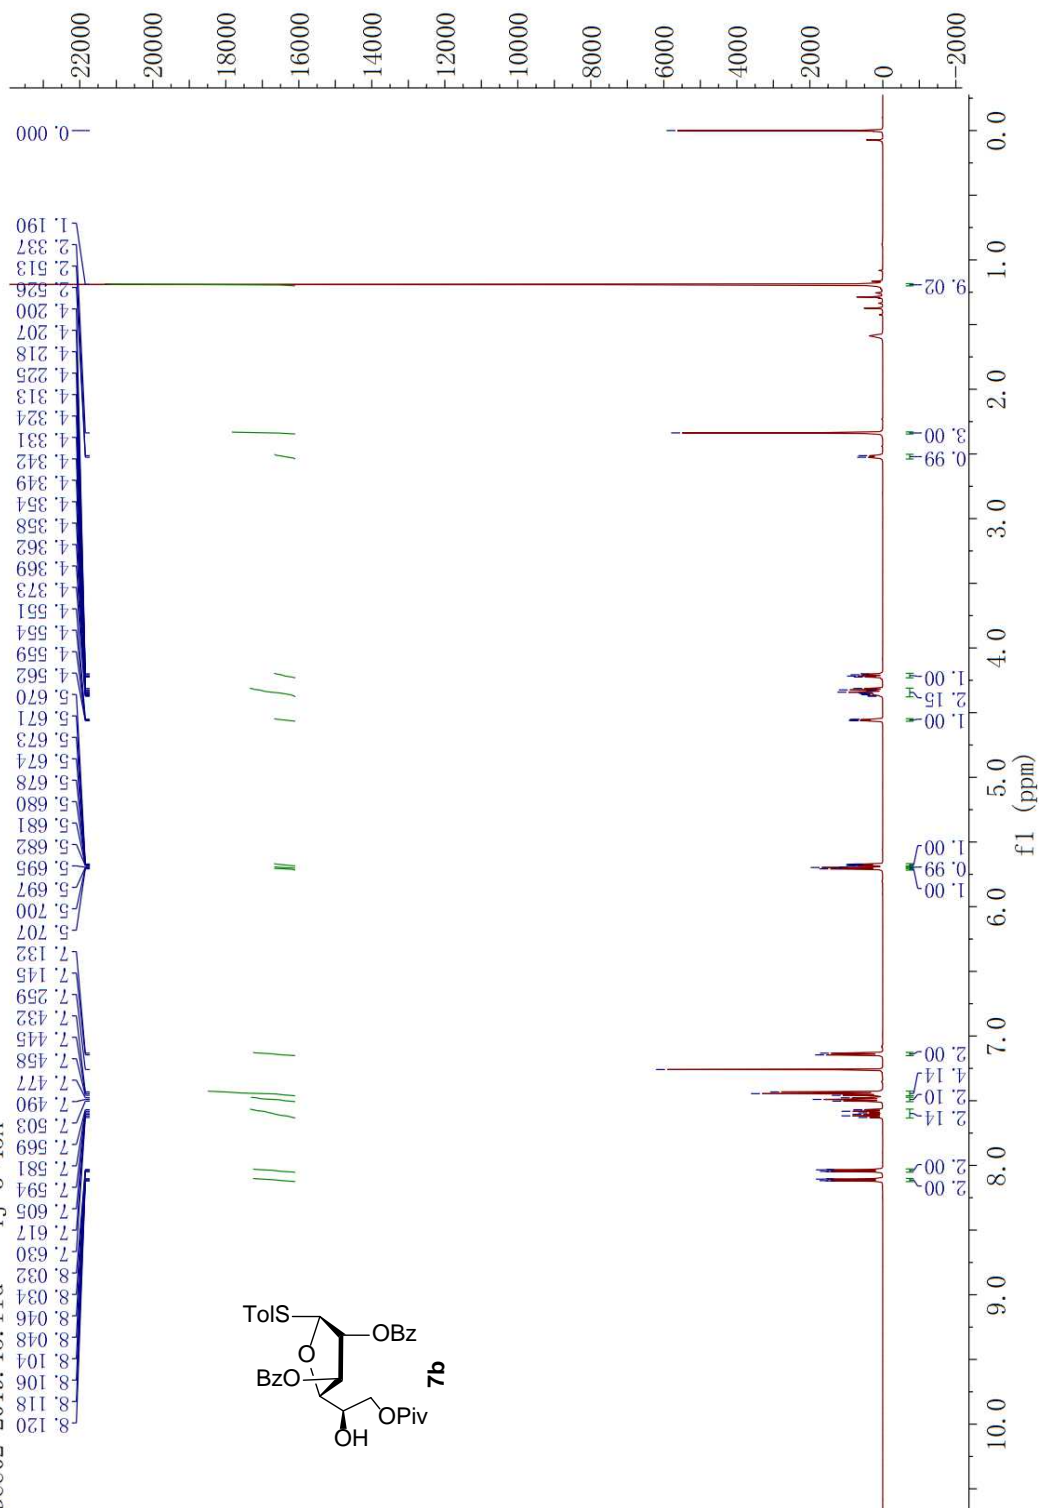

7b <sup>1</sup>H NMR (600 MHz, CDCl<sub>3</sub>)

Tolyl 6-O-p-nitrobenzoyl-2,3-di-O-benzoyl-1-thio-β-D-galactofuranoside (7c)

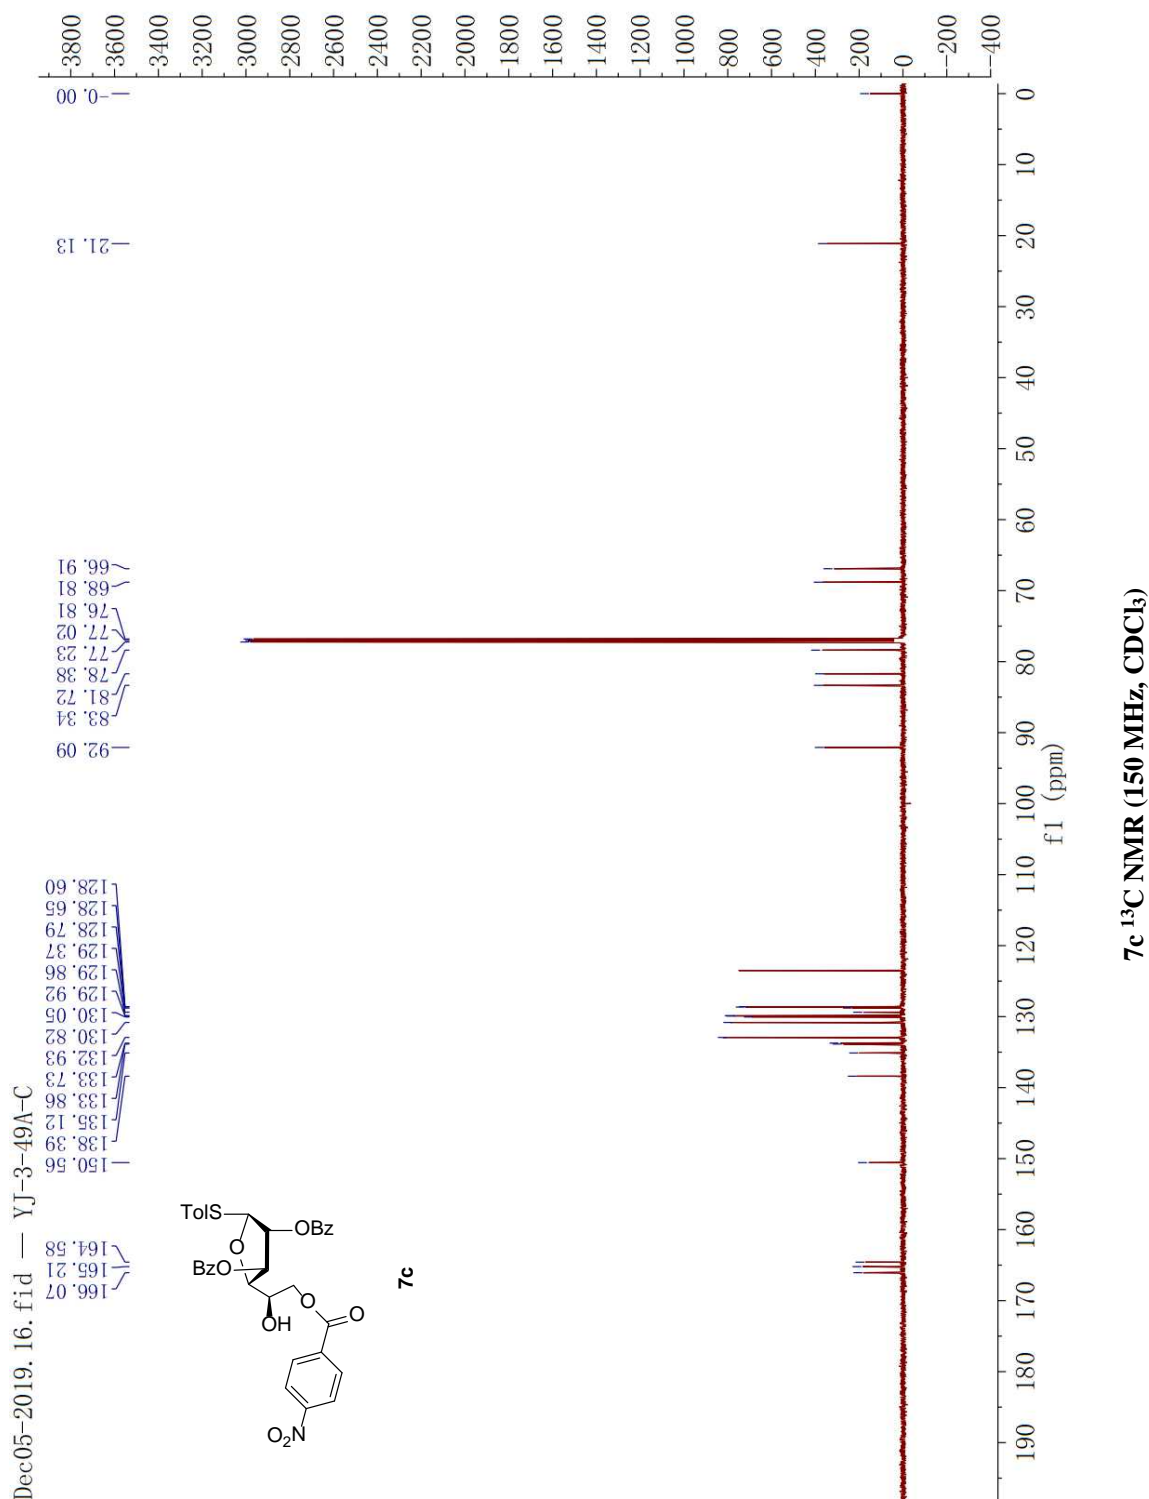

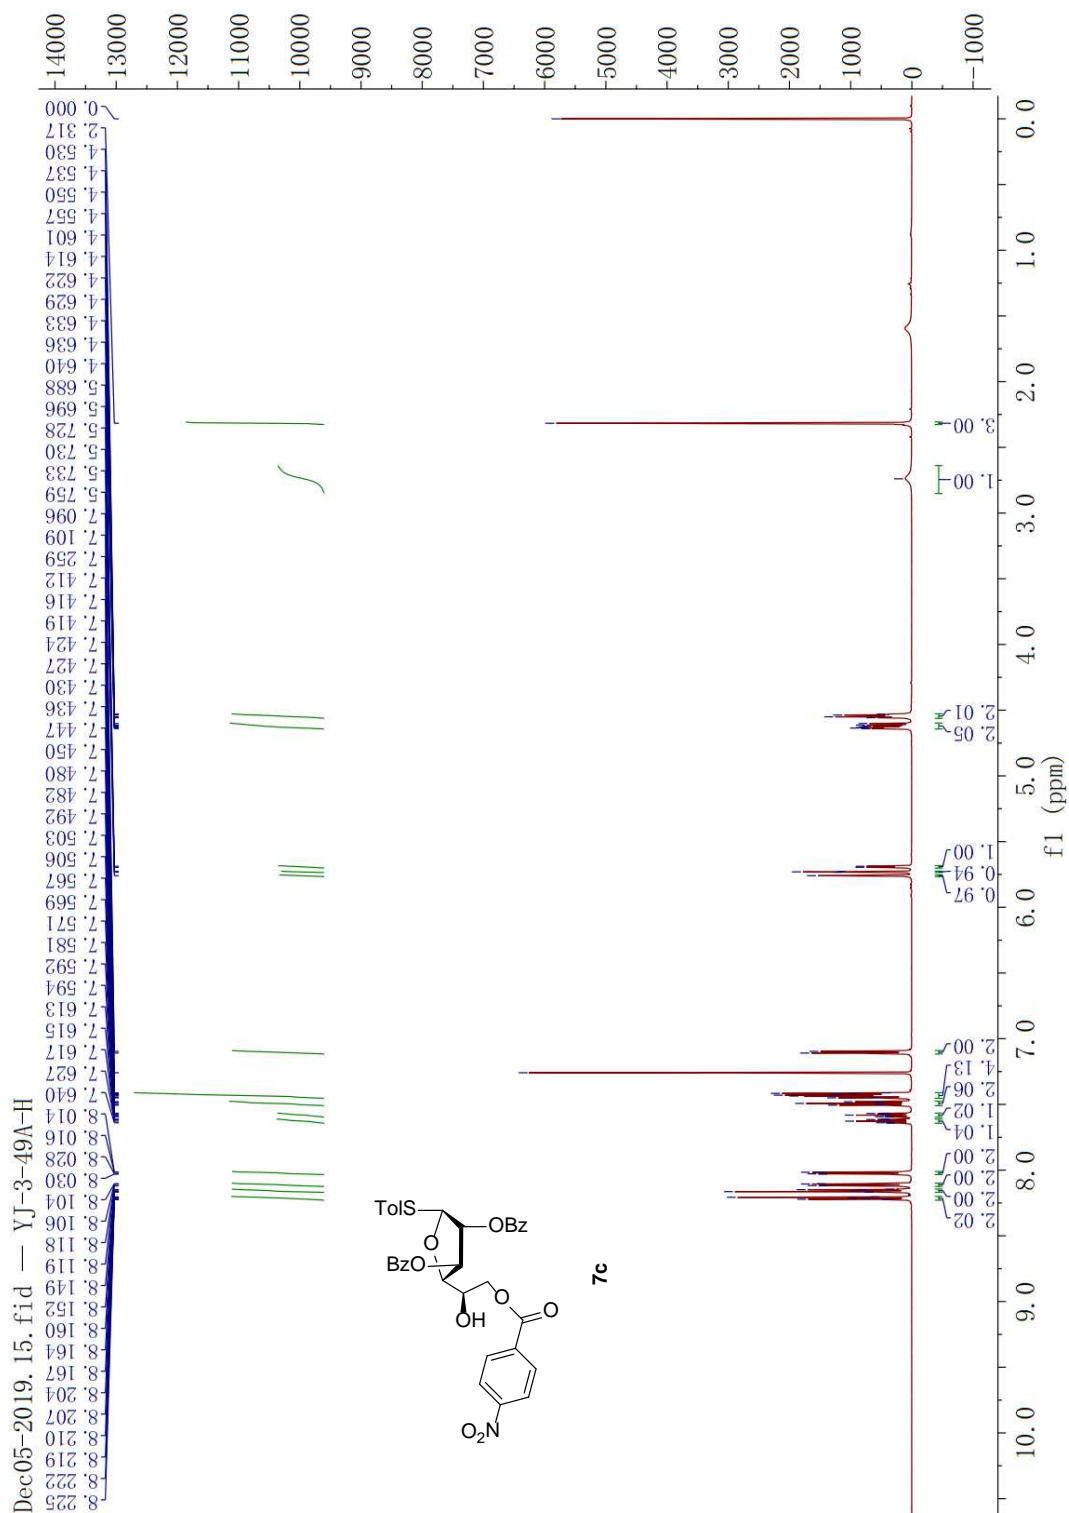

**7c** <sup>1</sup>H NMR (600 MHz, CDCl<sub>3</sub>)

Tolyl 6-*O*-*p*-methoxybenzoyl-2,3-*di-O*-benzoyl-1-*thio*- $\beta$ -D-galactofuranoside (7d)

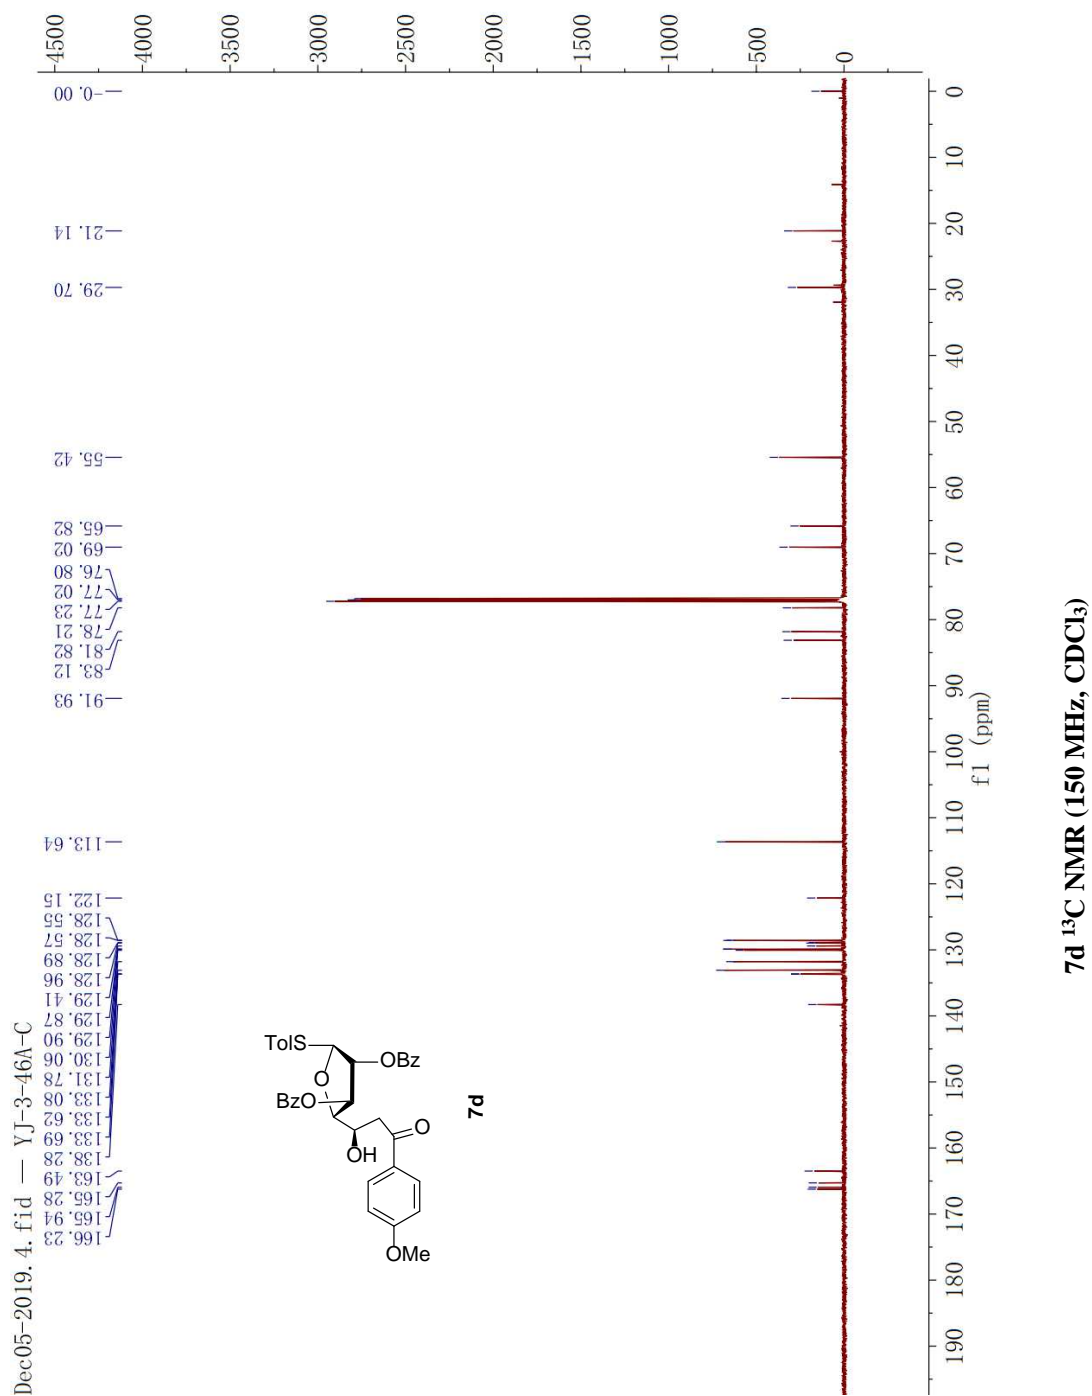

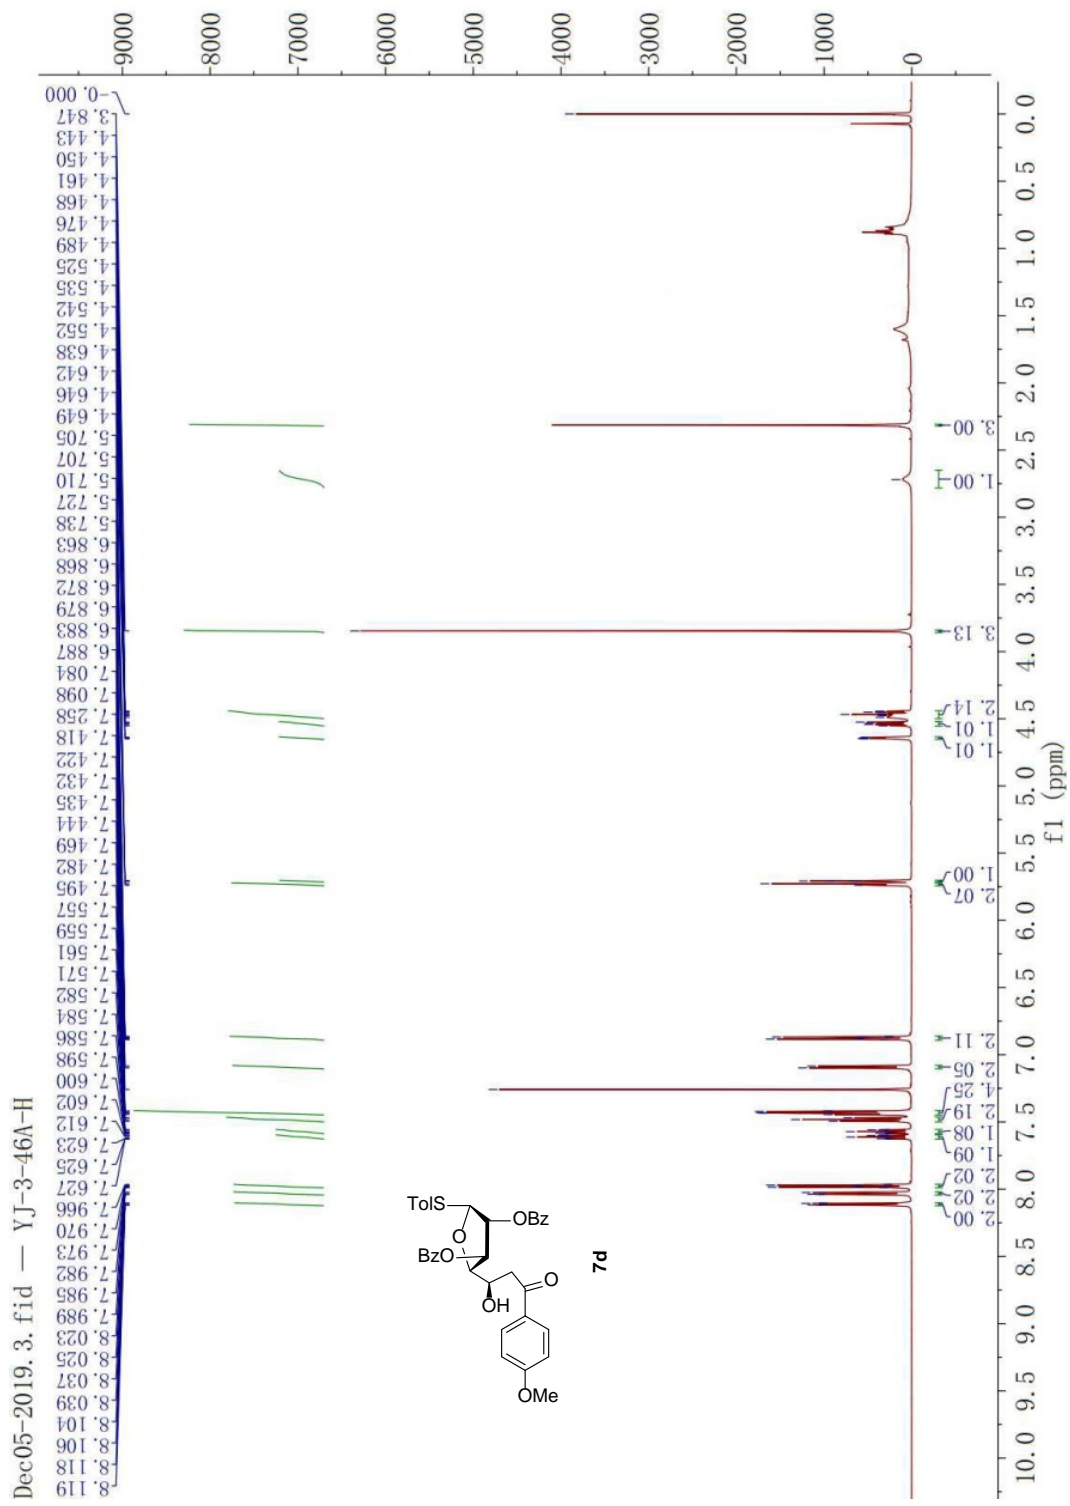

**7d** <sup>1</sup>H NMR (600 MHz, CDCl<sub>3</sub>)

## 2-Hydroxy-2-phenylethyl benzoate (10a)

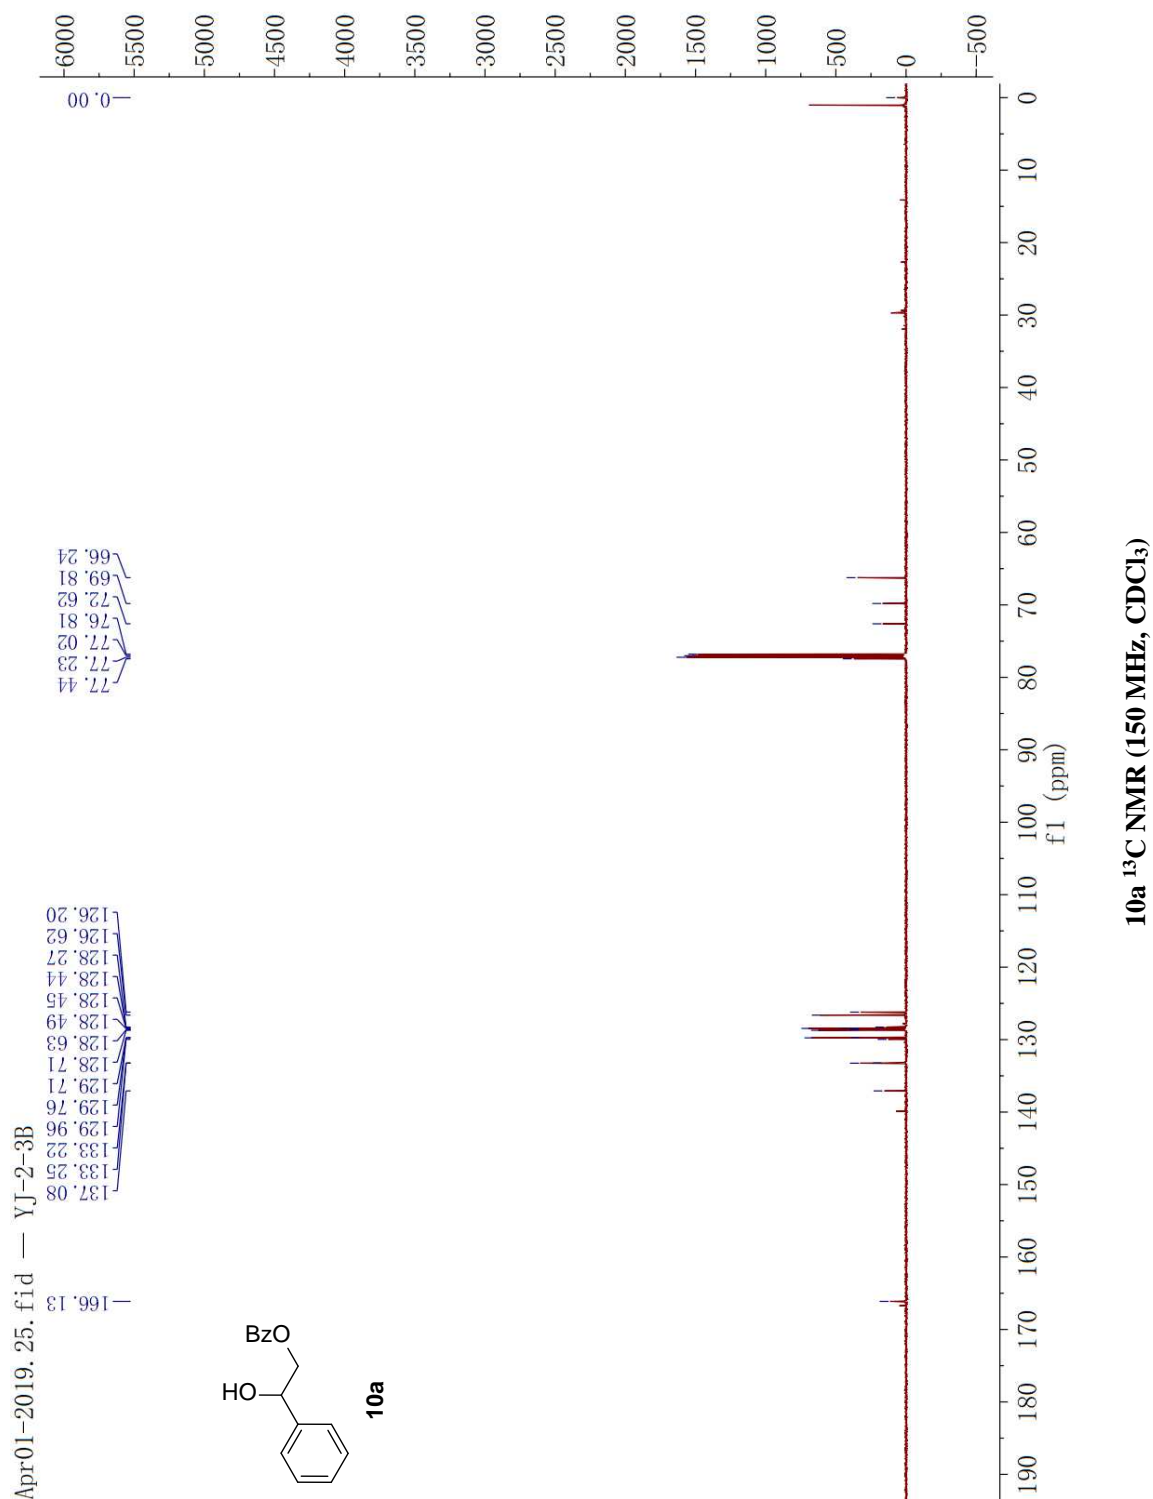

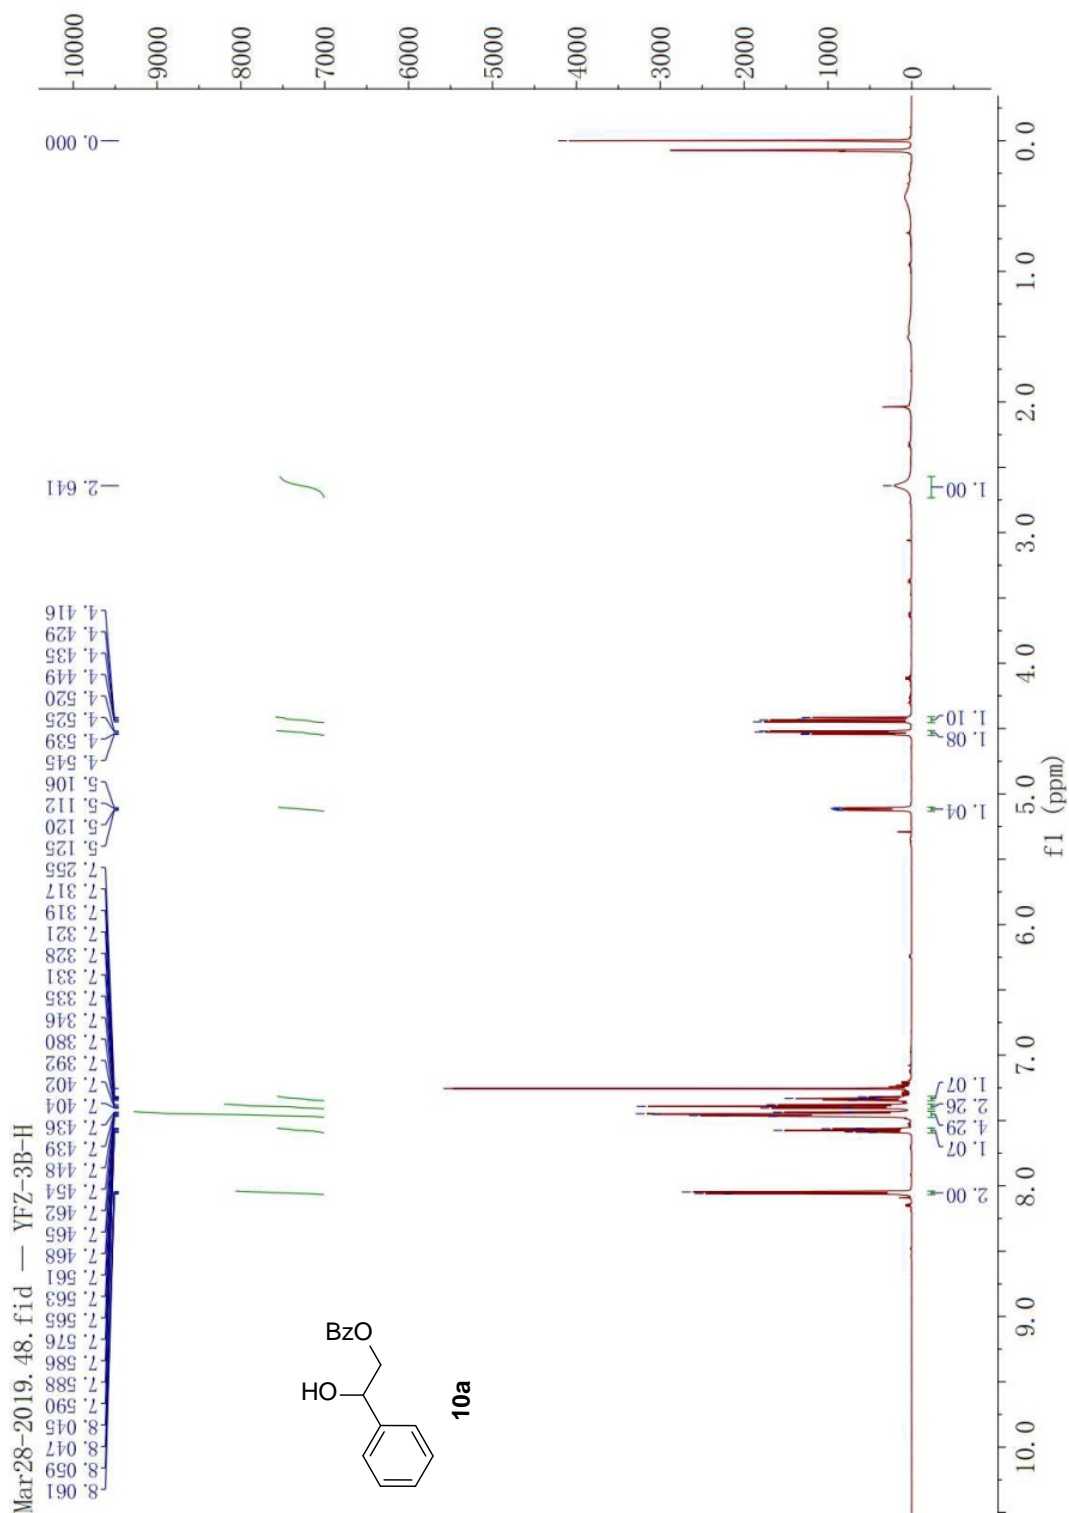



## 2-Hydroxy-3-phenoxypropyl benzoate (10b)

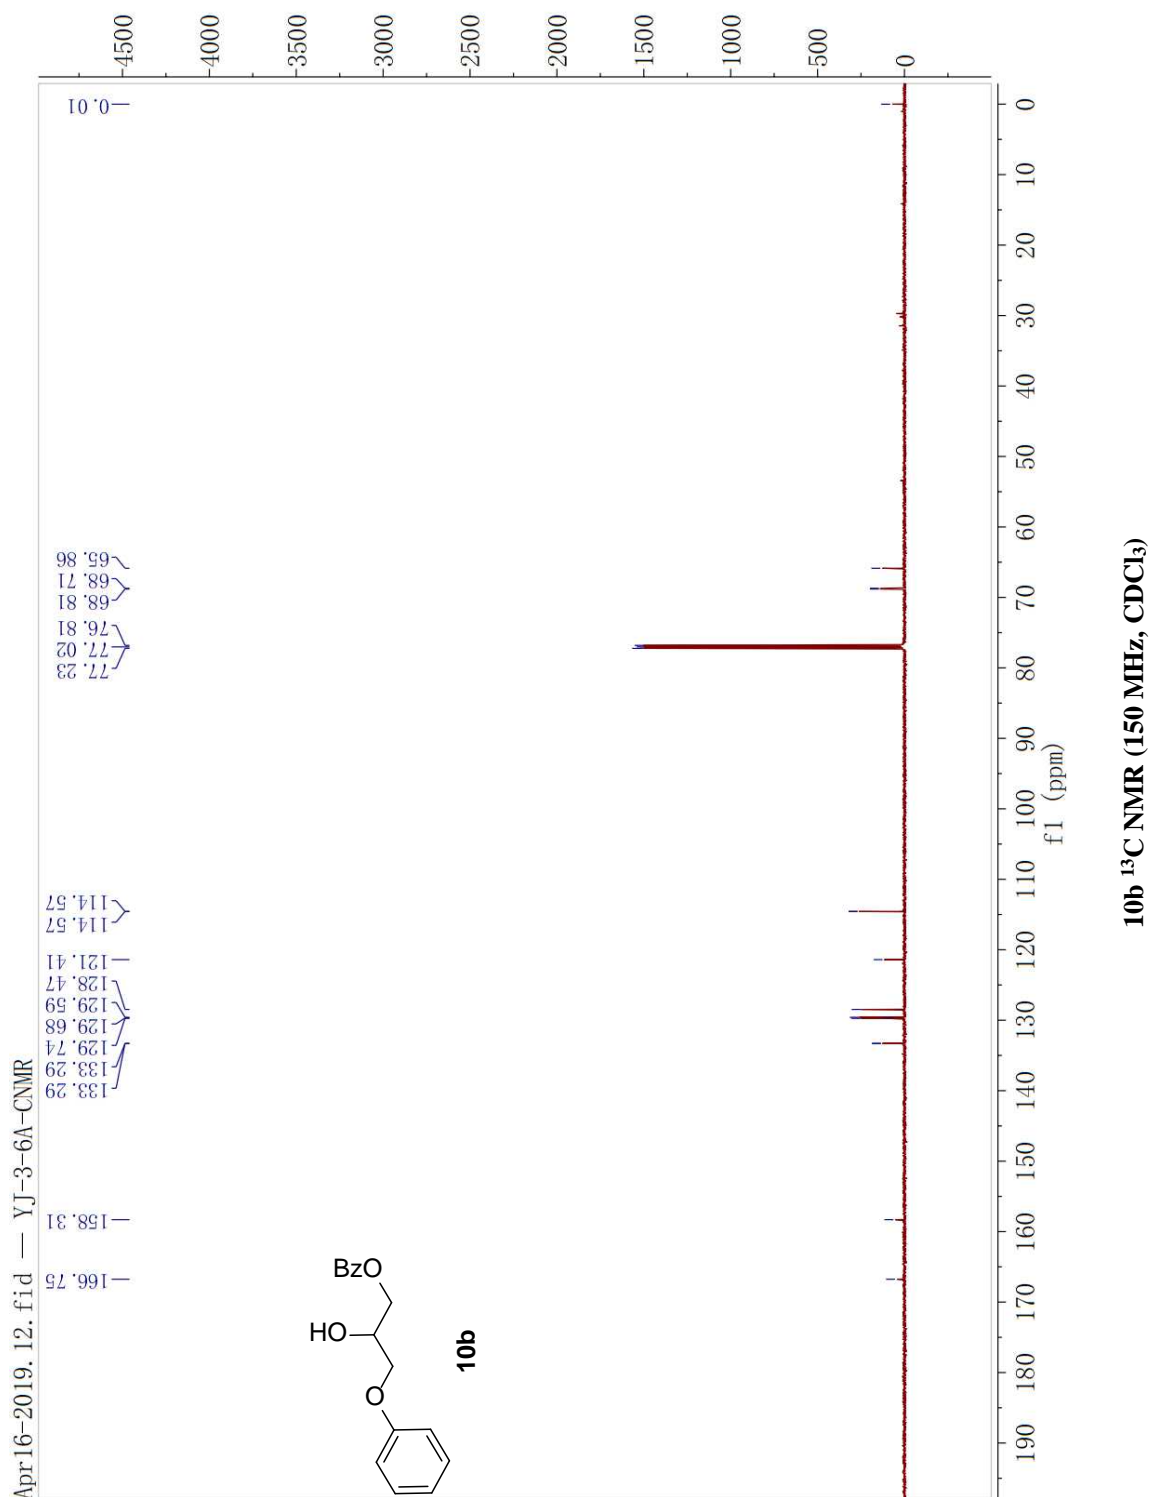

Apr 11-2019. 5. fid — YJ-2-6A

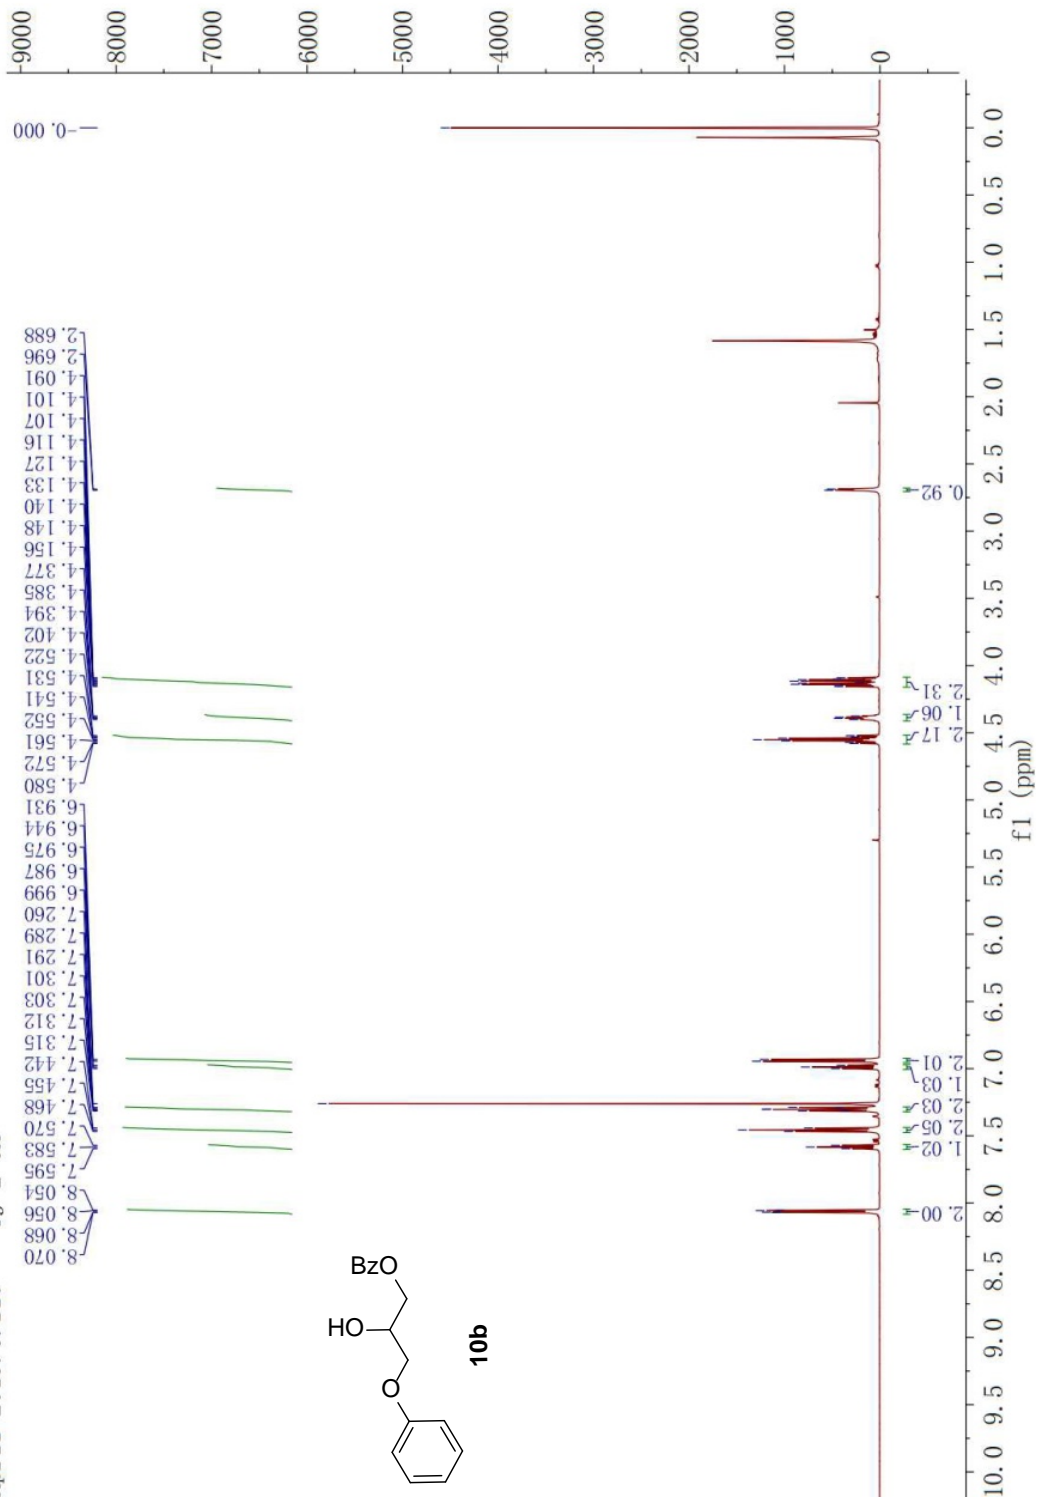

10b <sup>1</sup>H NMR (600 MHz, CDCl<sub>3</sub>)

Methyl 2,3,6-tri-O-benzoyl-β-D-galactofuranoside (10c)

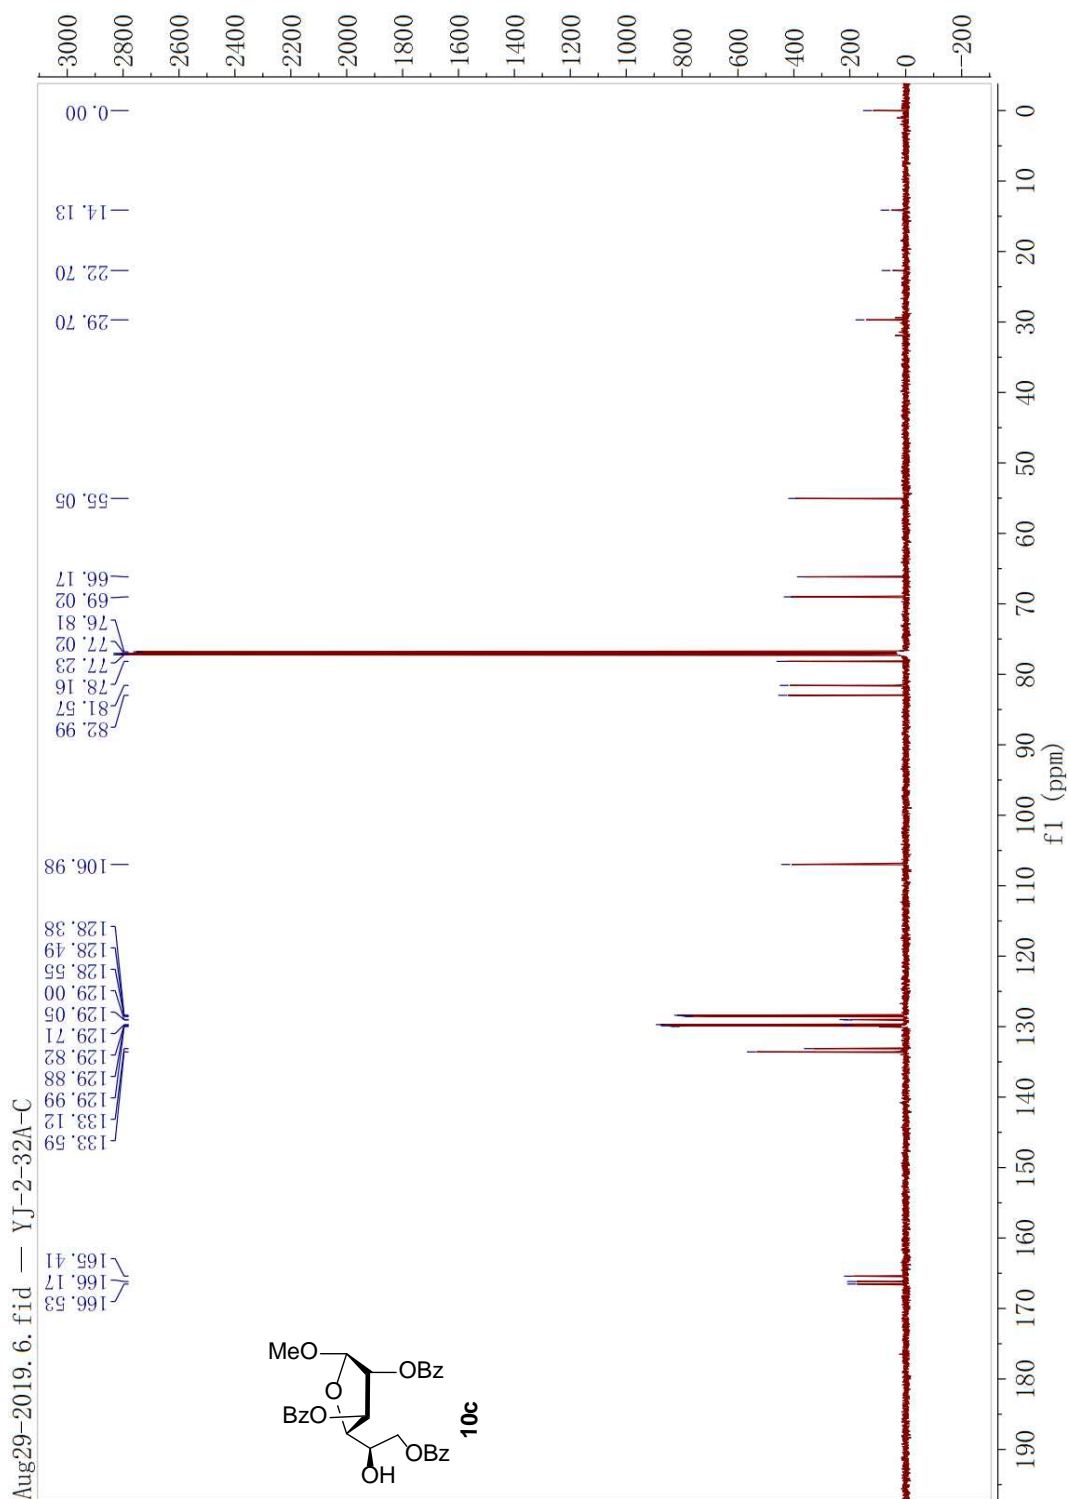

10c <sup>13</sup>C NMR (150 MHz, CDCl<sub>3</sub>)

Aug29-2019, 5. fid — YJ-2-32A-H

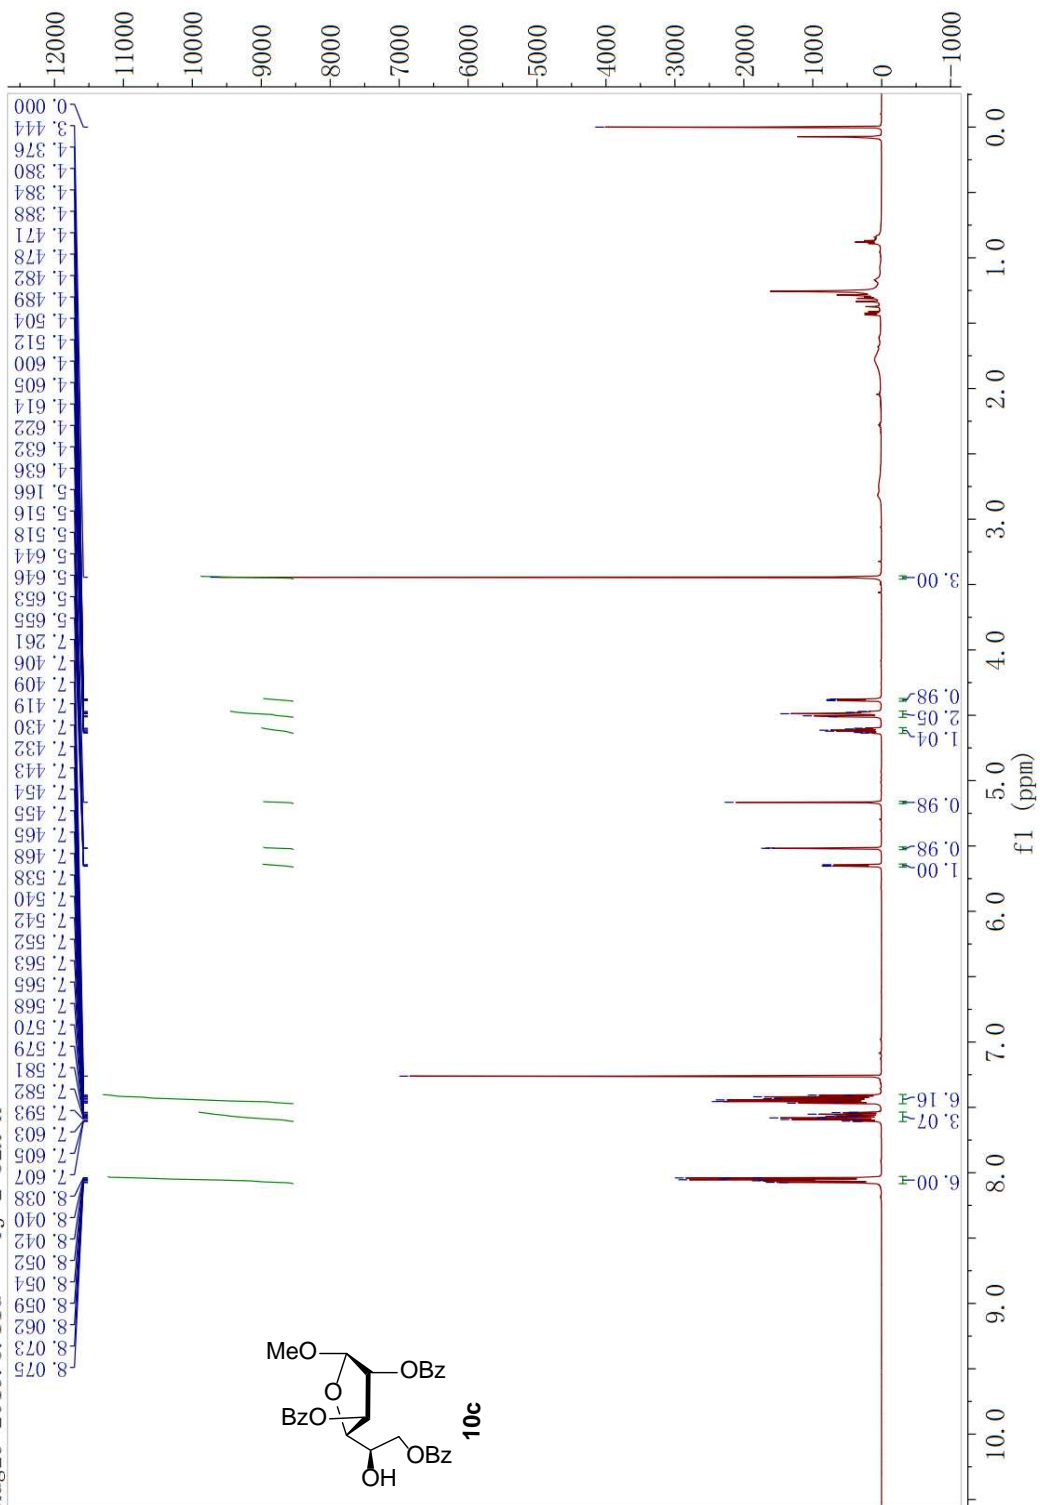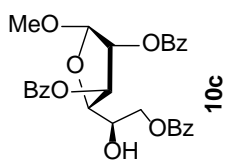

**10c** <sup>1</sup>H NMR (600 MHz, CDCl<sub>3</sub>)

# 1,2-*O*-Isopropylidene-6-*O*-benzoyl-3-*O*-benzyl- $\alpha$ -D-glucofuranose (10d)

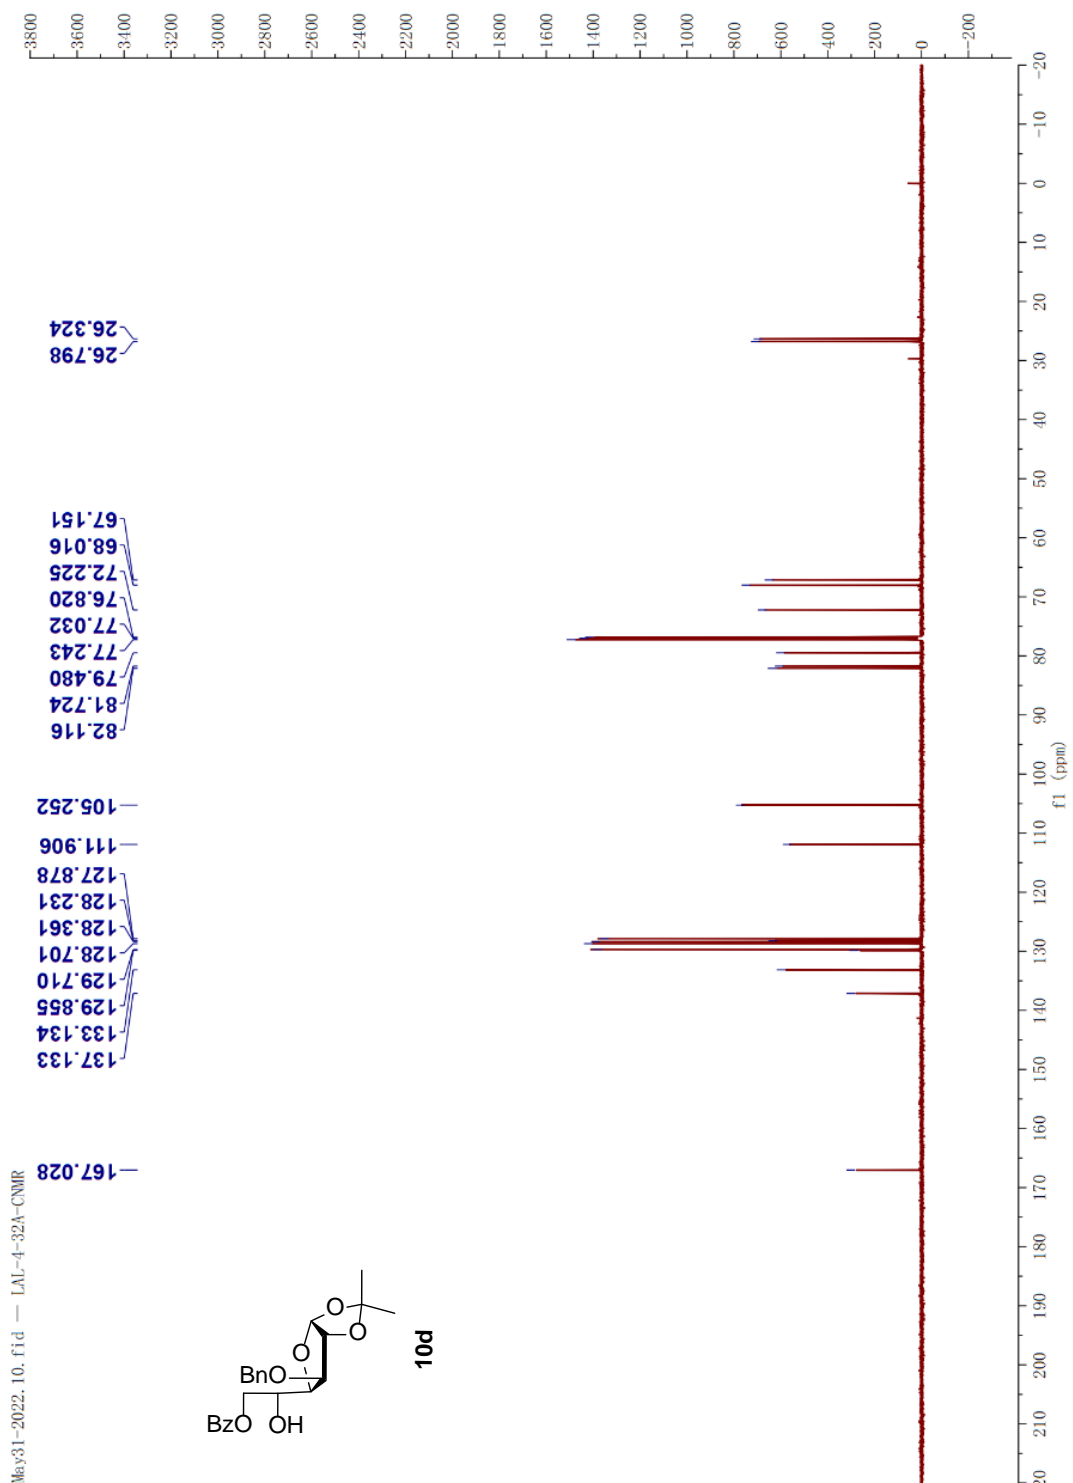

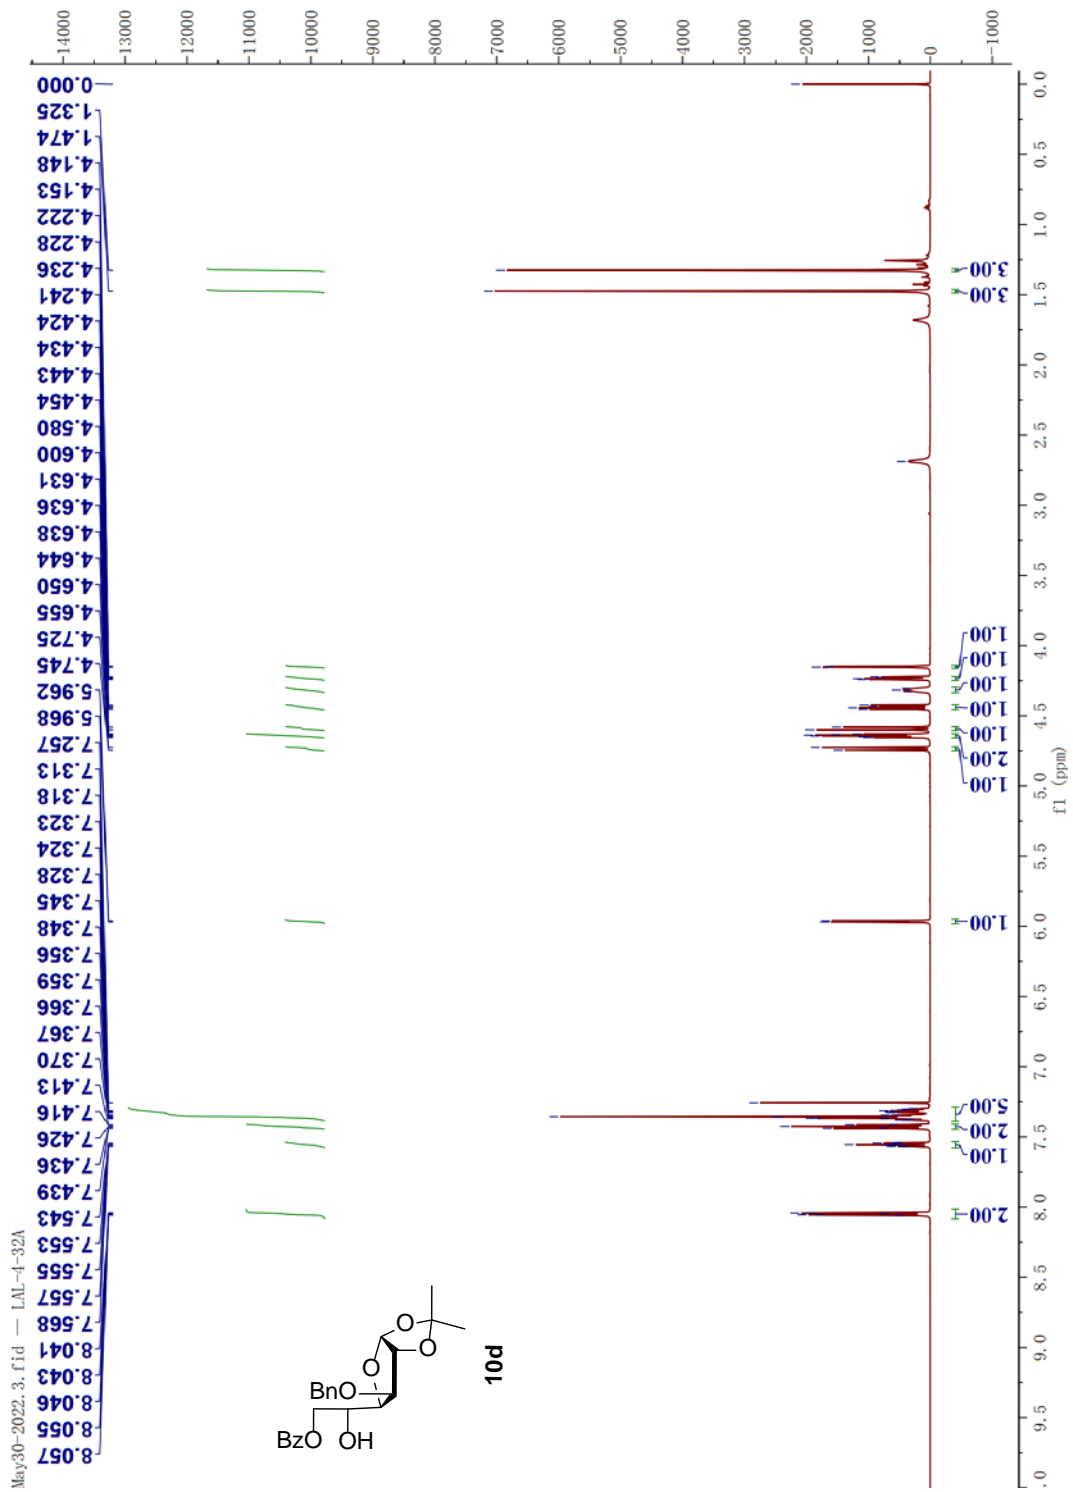

10d <sup>1</sup>H NMR (600 MHz, CDCl<sub>3</sub>)

**Tolyl 2,3,4-tri-O-benzoyl-1-thio- $\beta$ -D-galactopyranoside (9e), Tolyl 2,3,6-tri-O-benzoyl-1-thio- $\beta$ -D-galactopyranoside (10e) and Tolyl 2,4,6-tri-O-benzoyl-1-thio- $\beta$ -D-galactopyranoside (10e')**

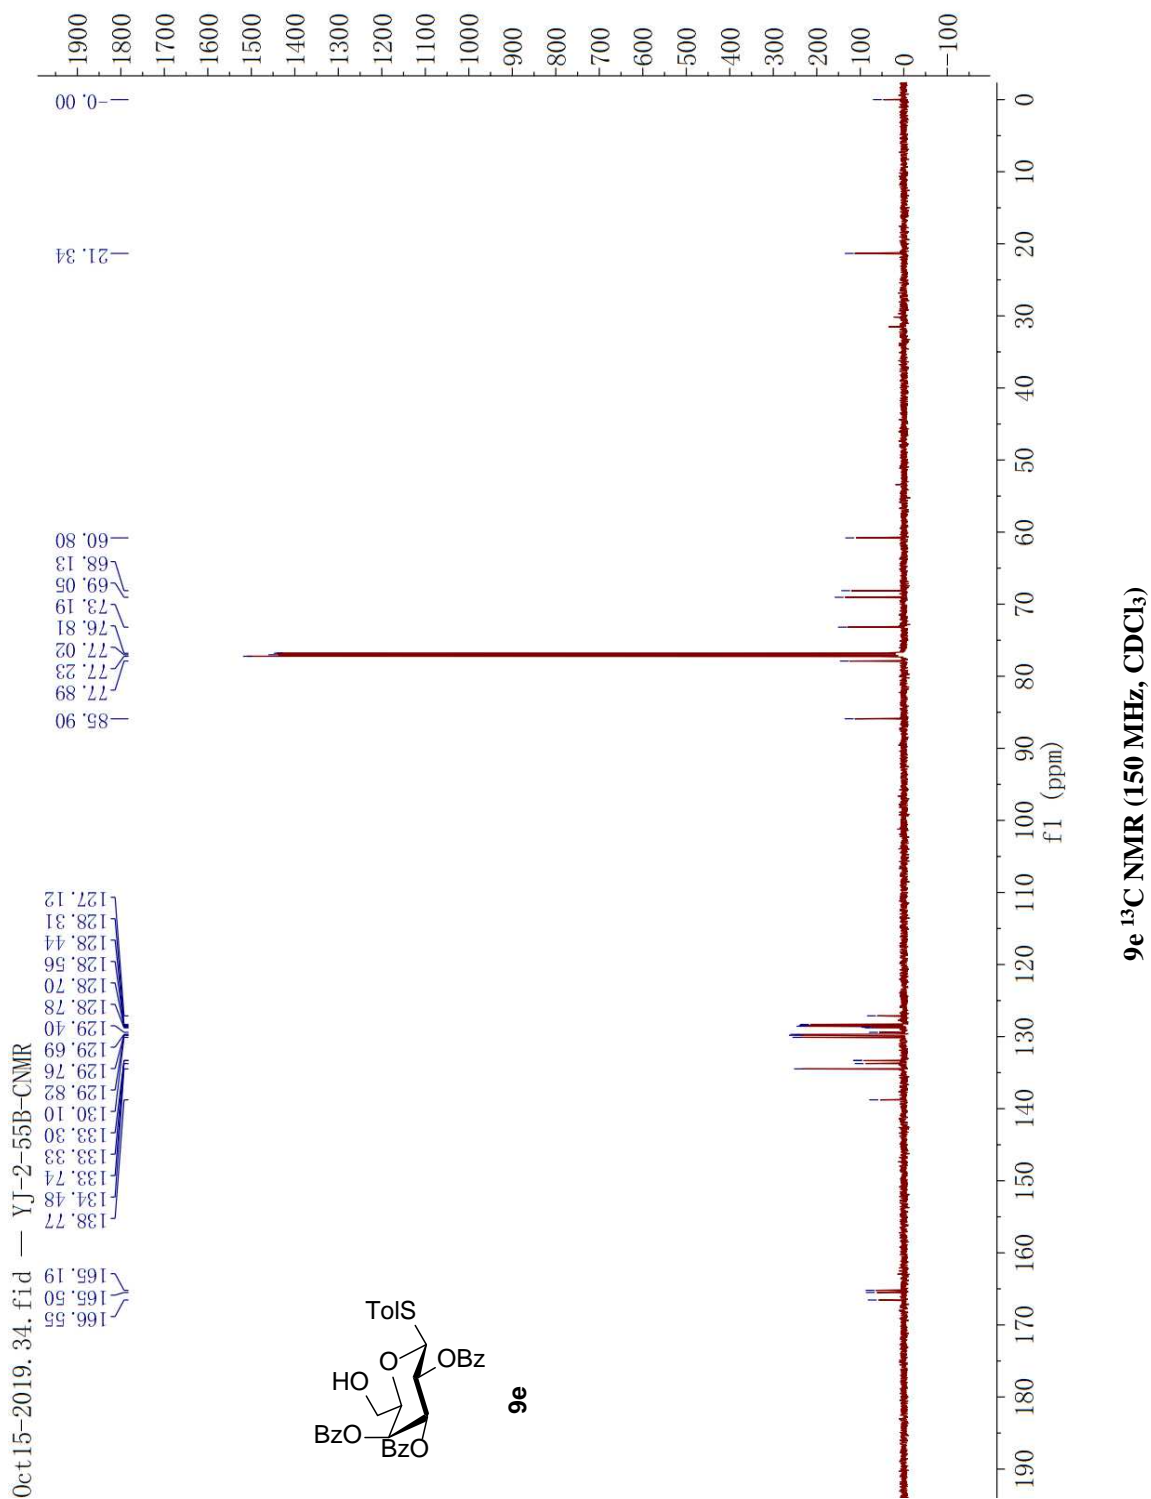

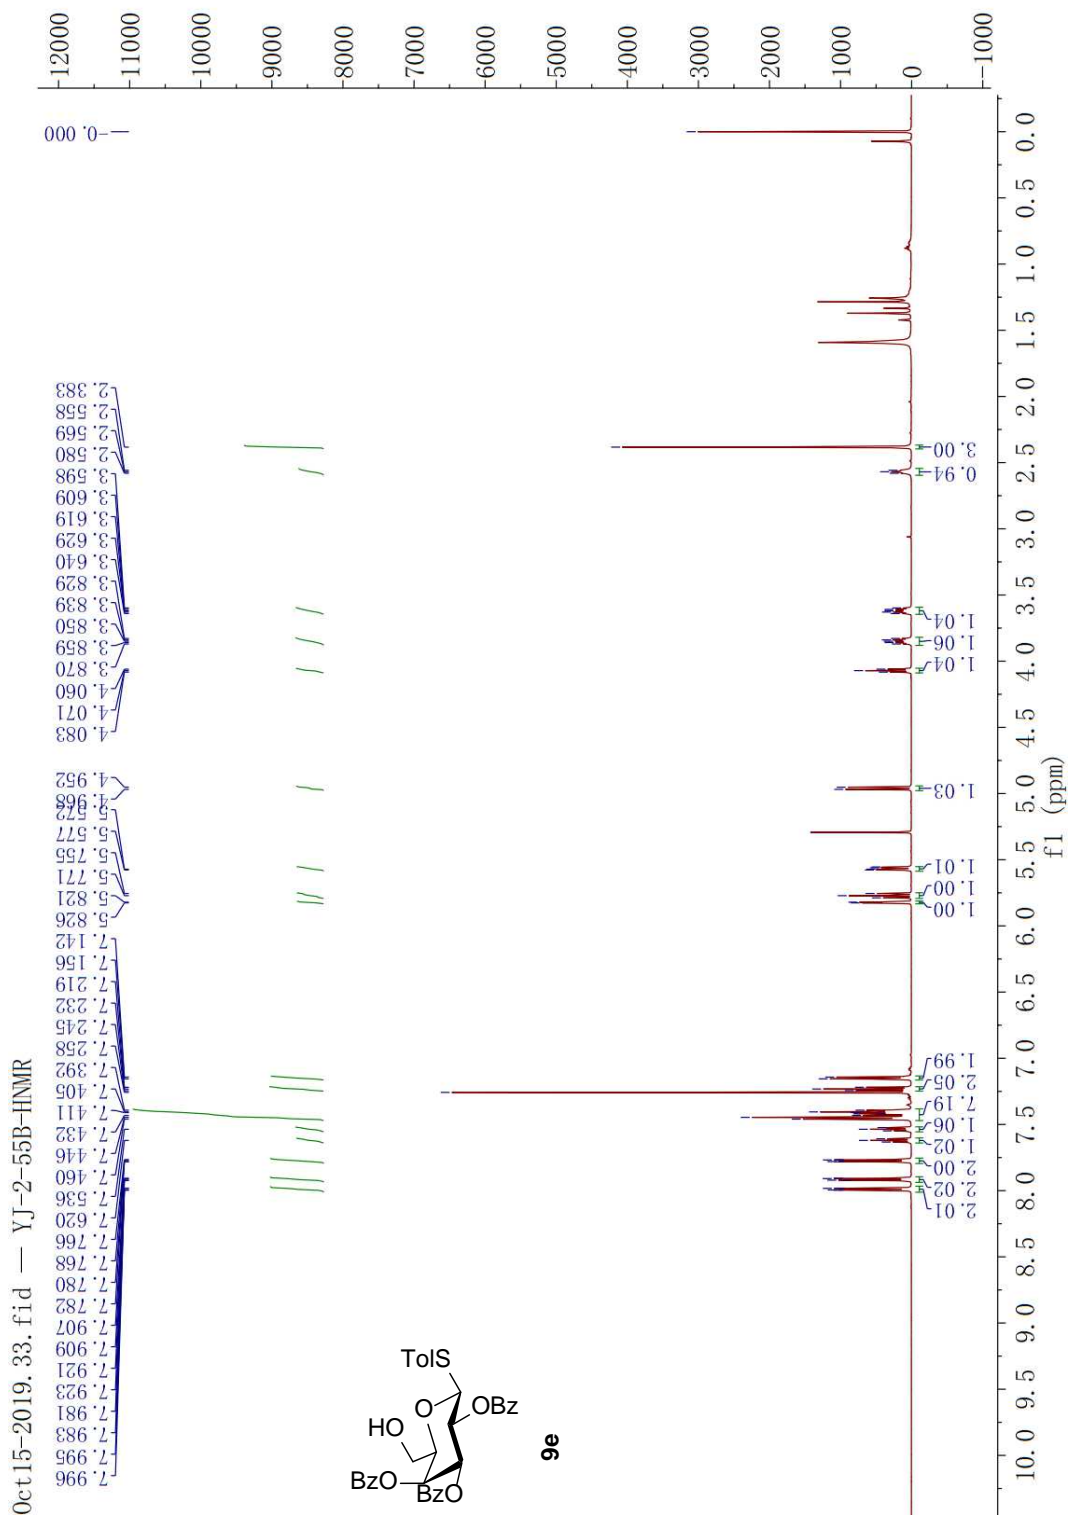

**9e** <sup>1</sup>H NMR (600 MHz, CDCl<sub>3</sub>)



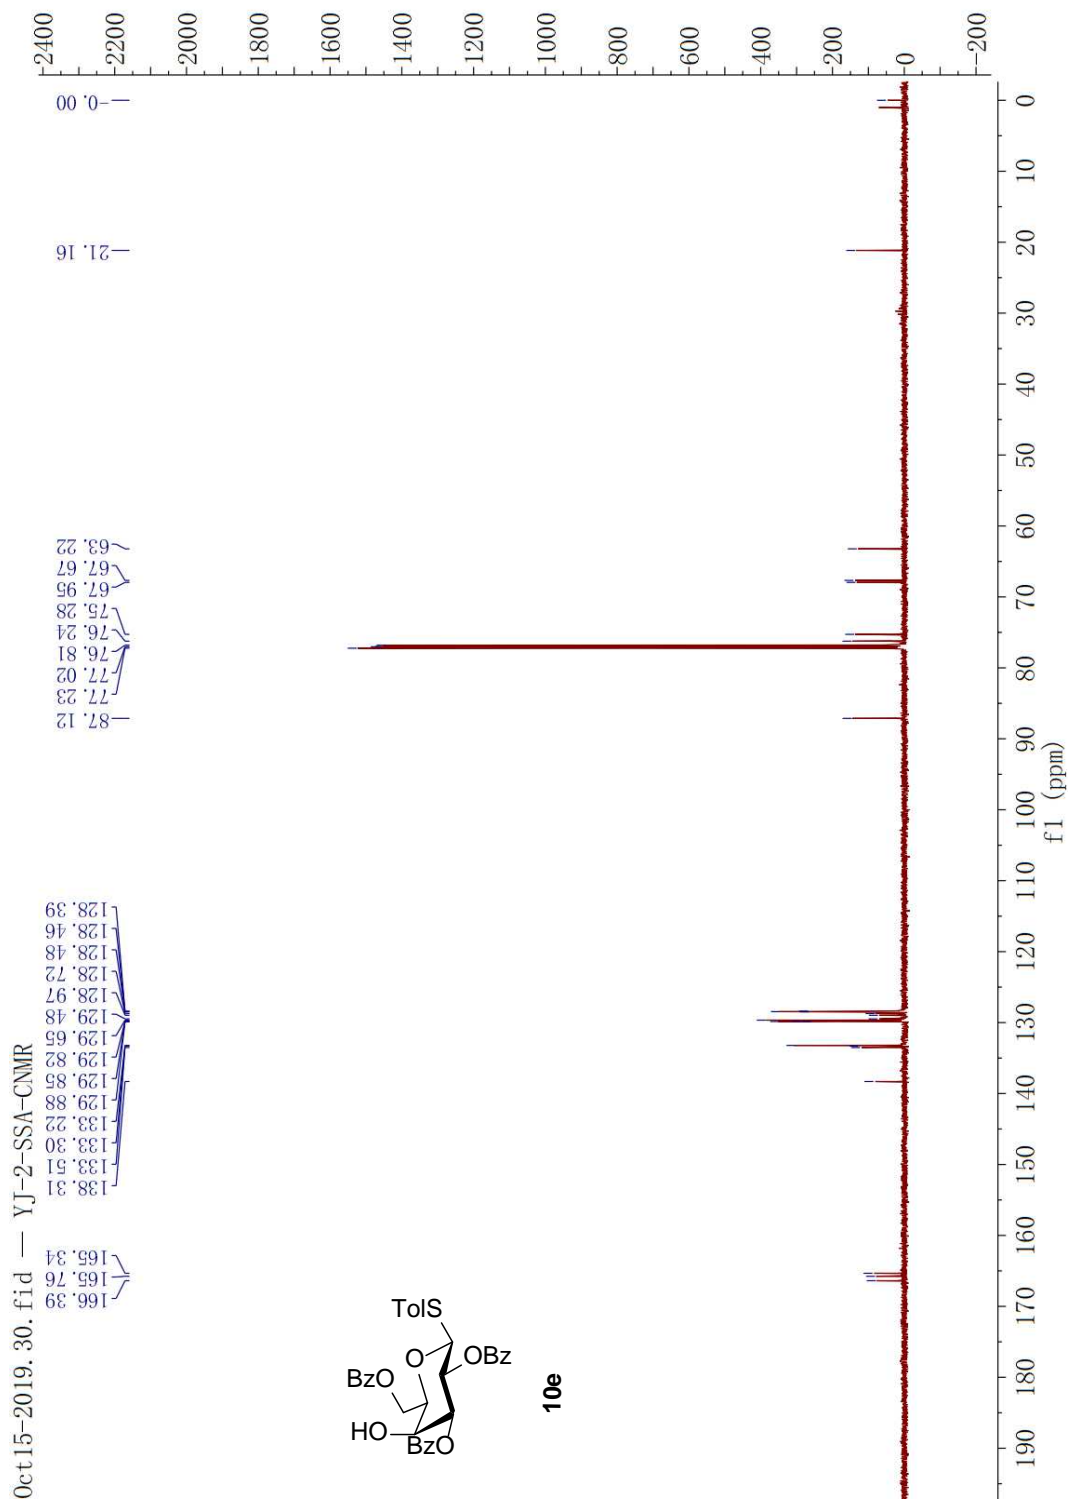

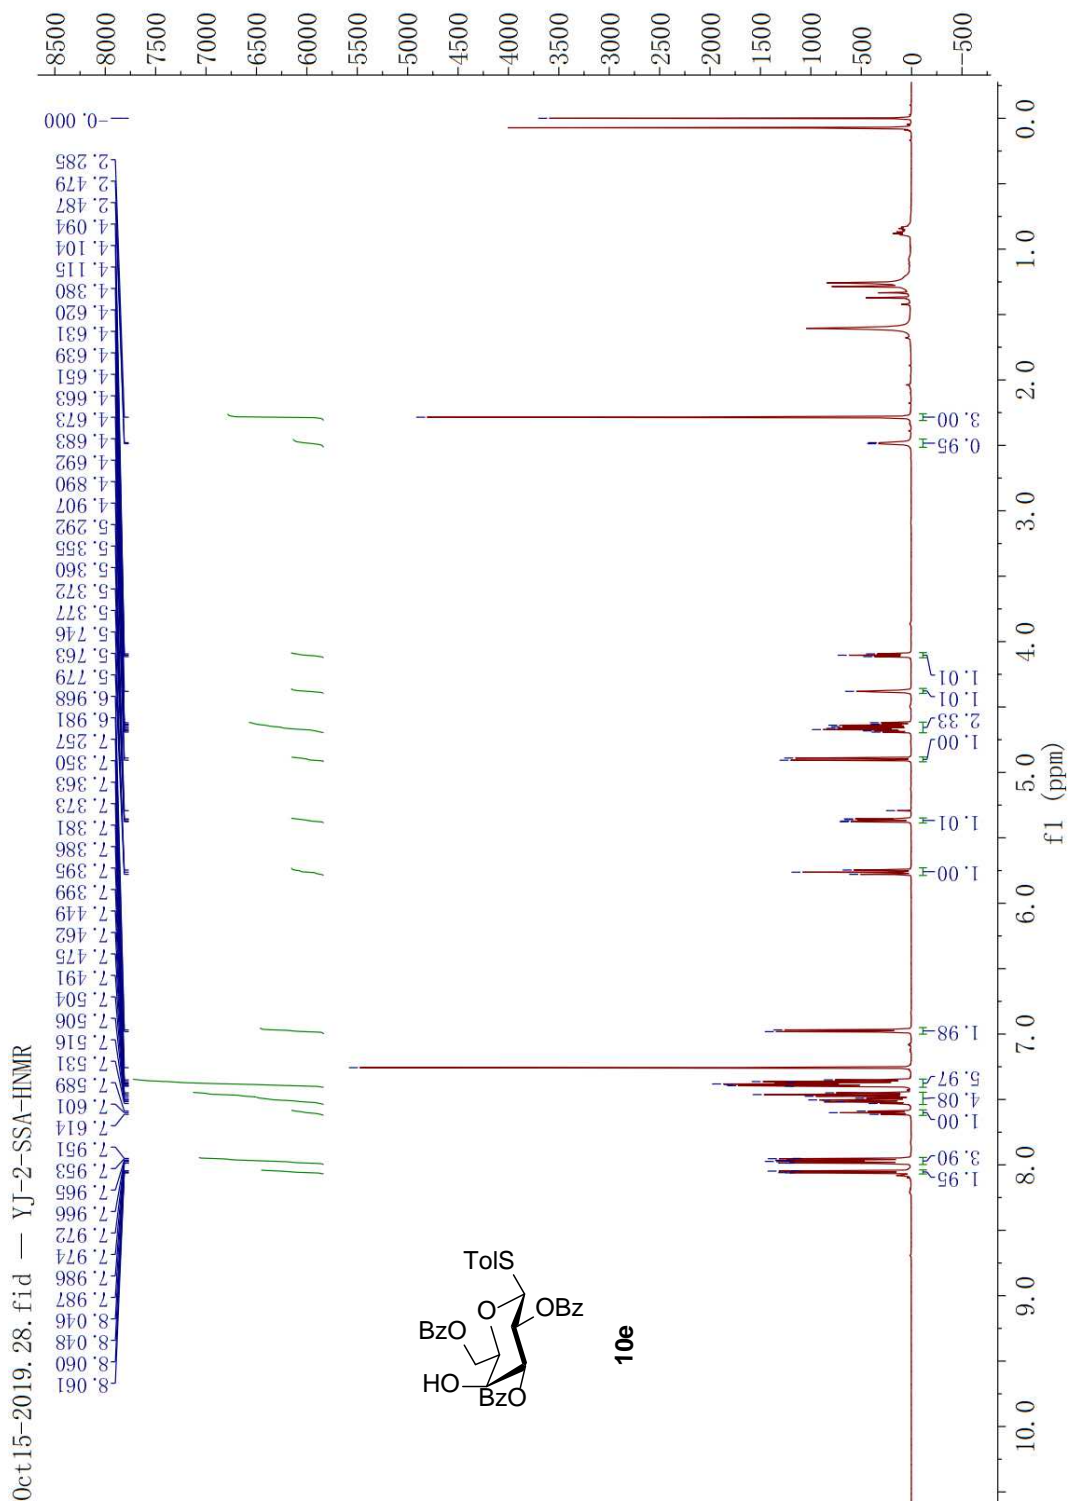

**10e** <sup>1</sup>H NMR (600 MHz, CDCl<sub>3</sub>)

Oct16-2019. 20. fid — YJ-2-55C-C

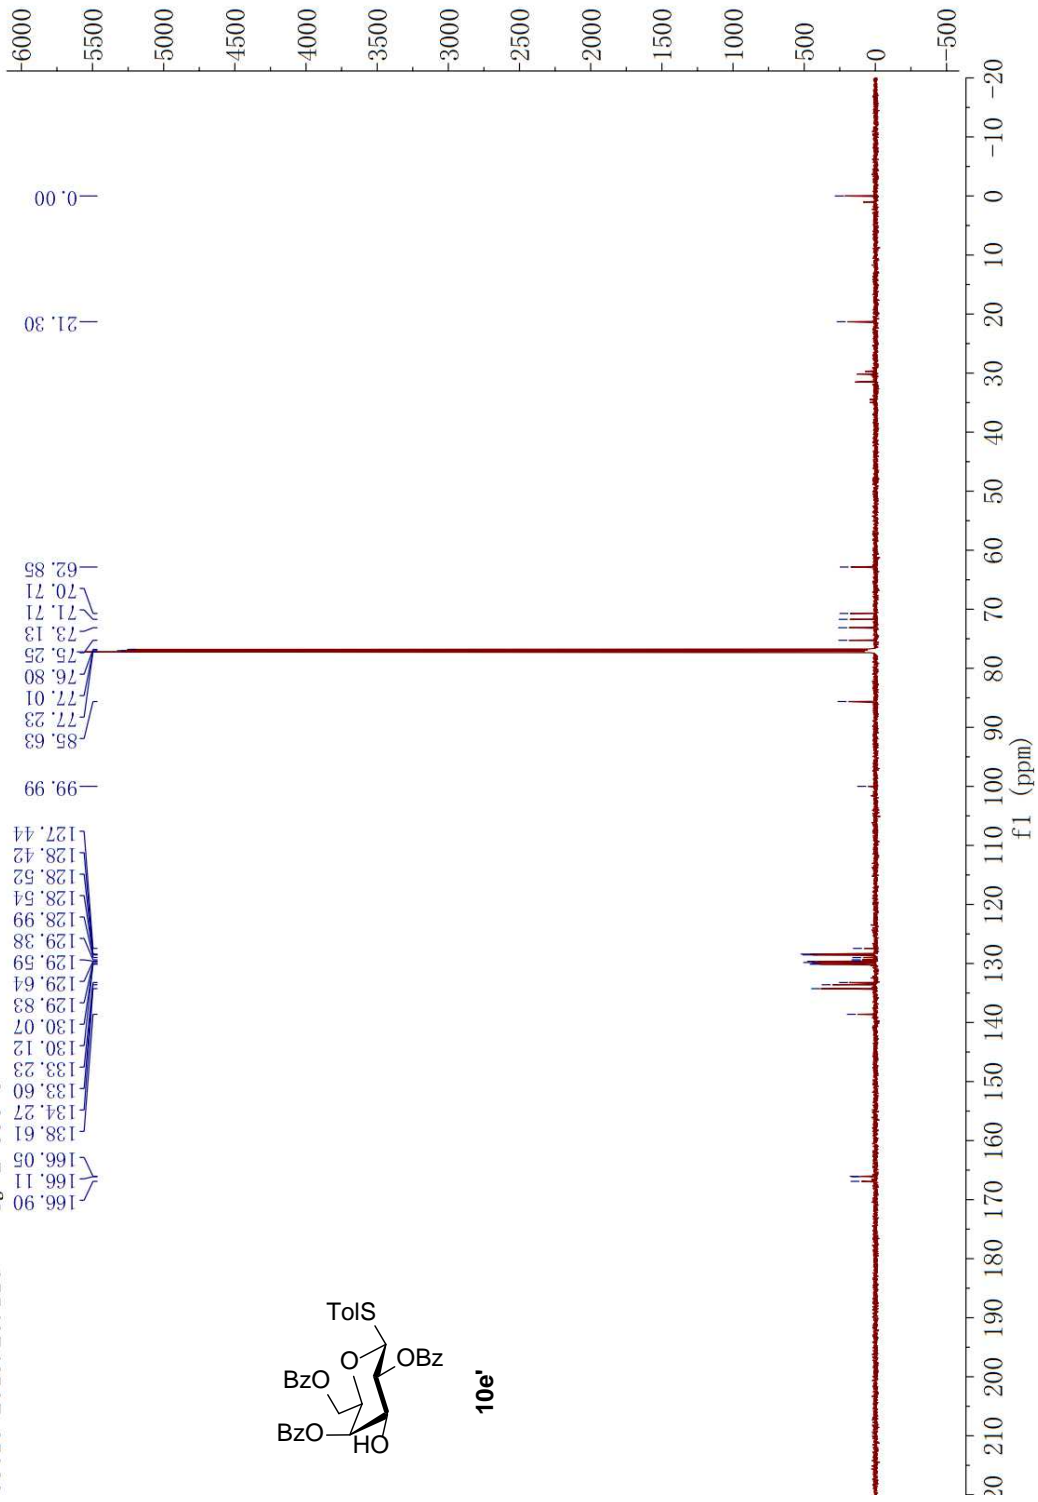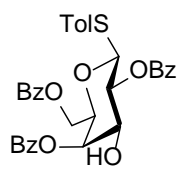

10e'

10e' <sup>13</sup>C NMR (150 MHz, CDCl<sub>3</sub>)

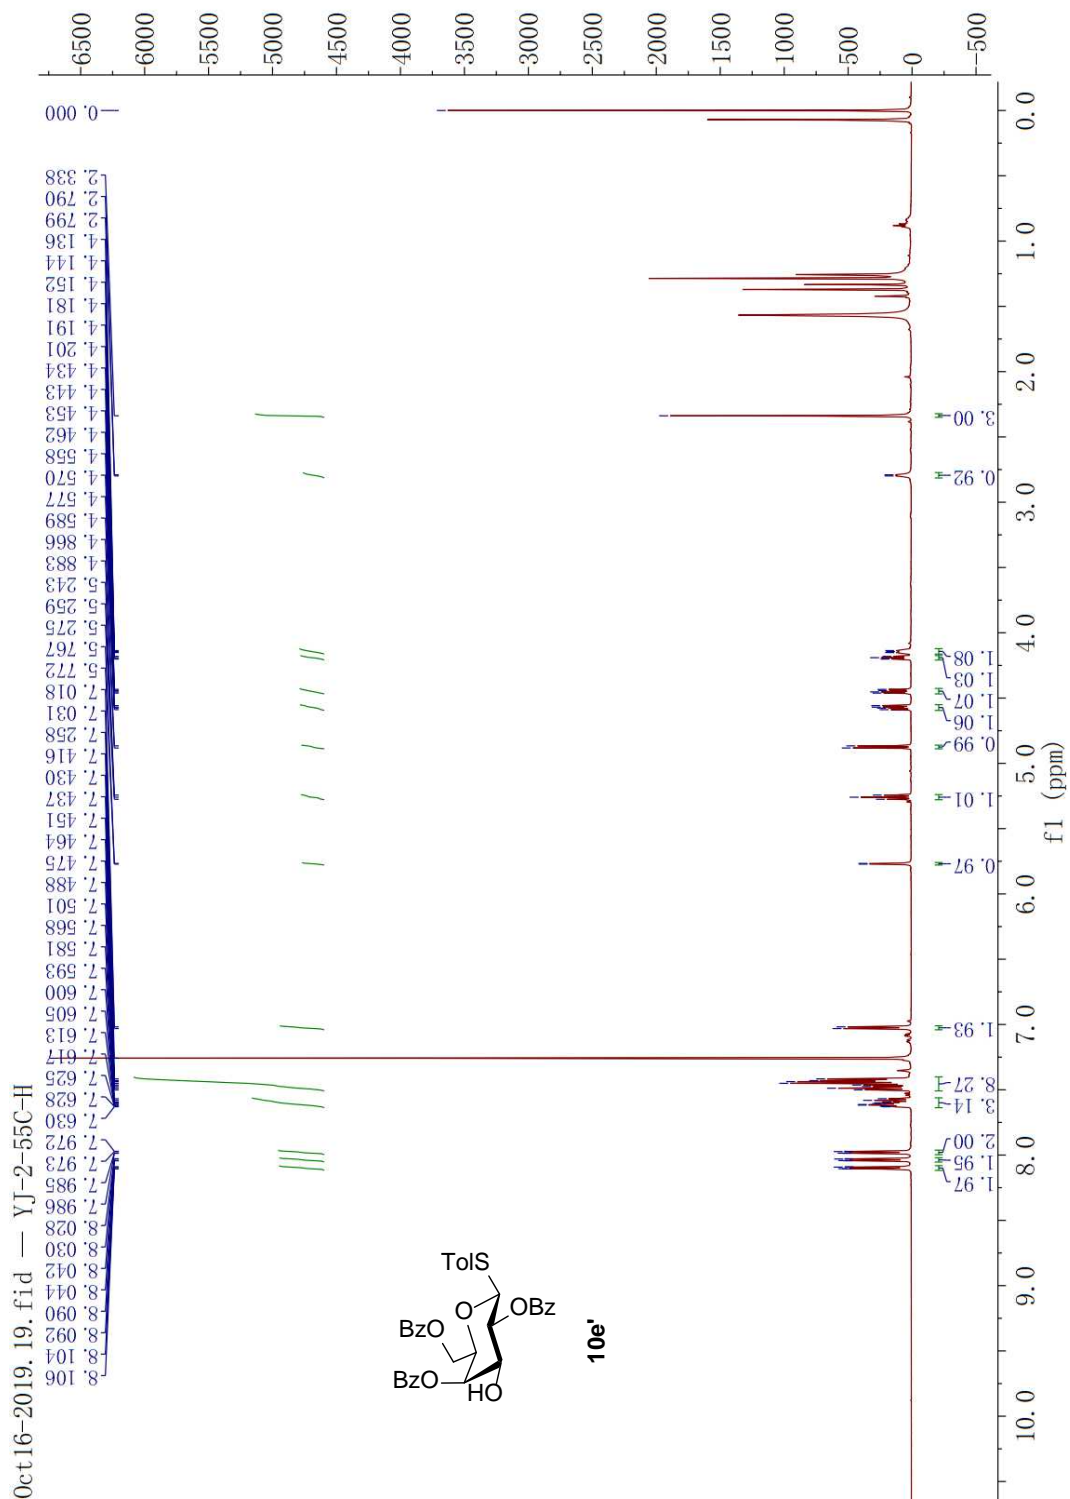

**10e'** <sup>1</sup>H NMR (600 MHz, CDCl<sub>3</sub>)

Methyl 2,3,6-tri-O-benzoyl- $\alpha$ -D-galactopyranoside (10f)

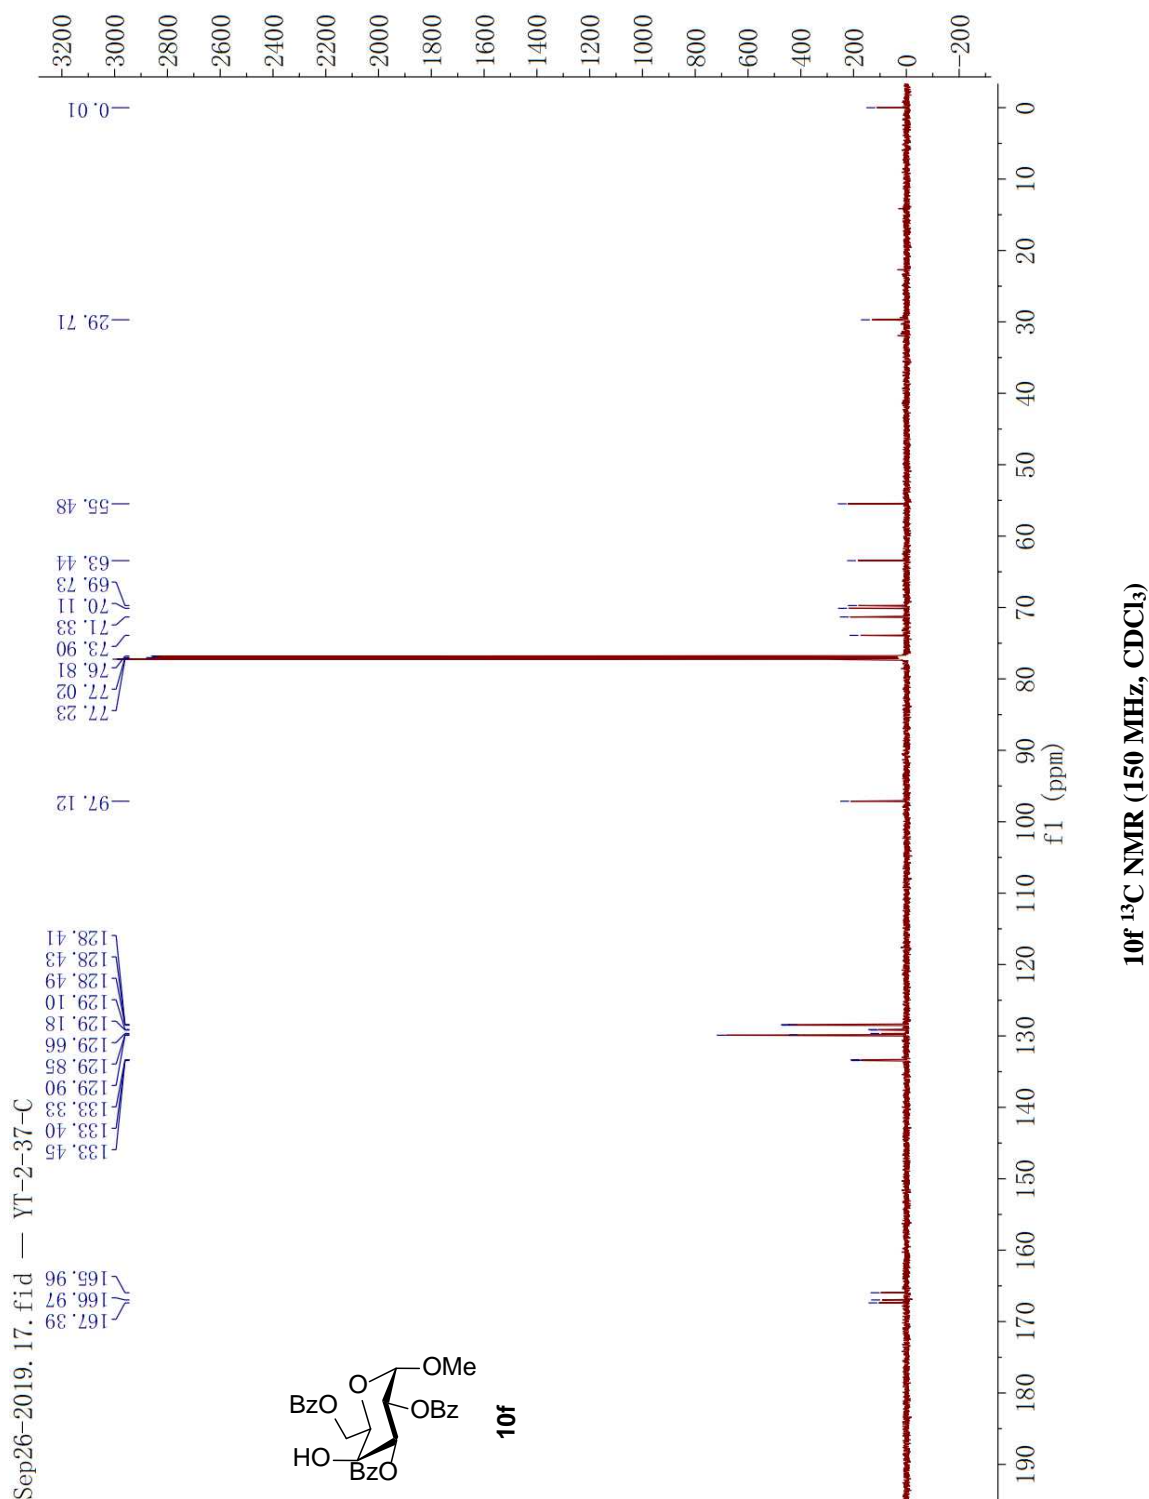

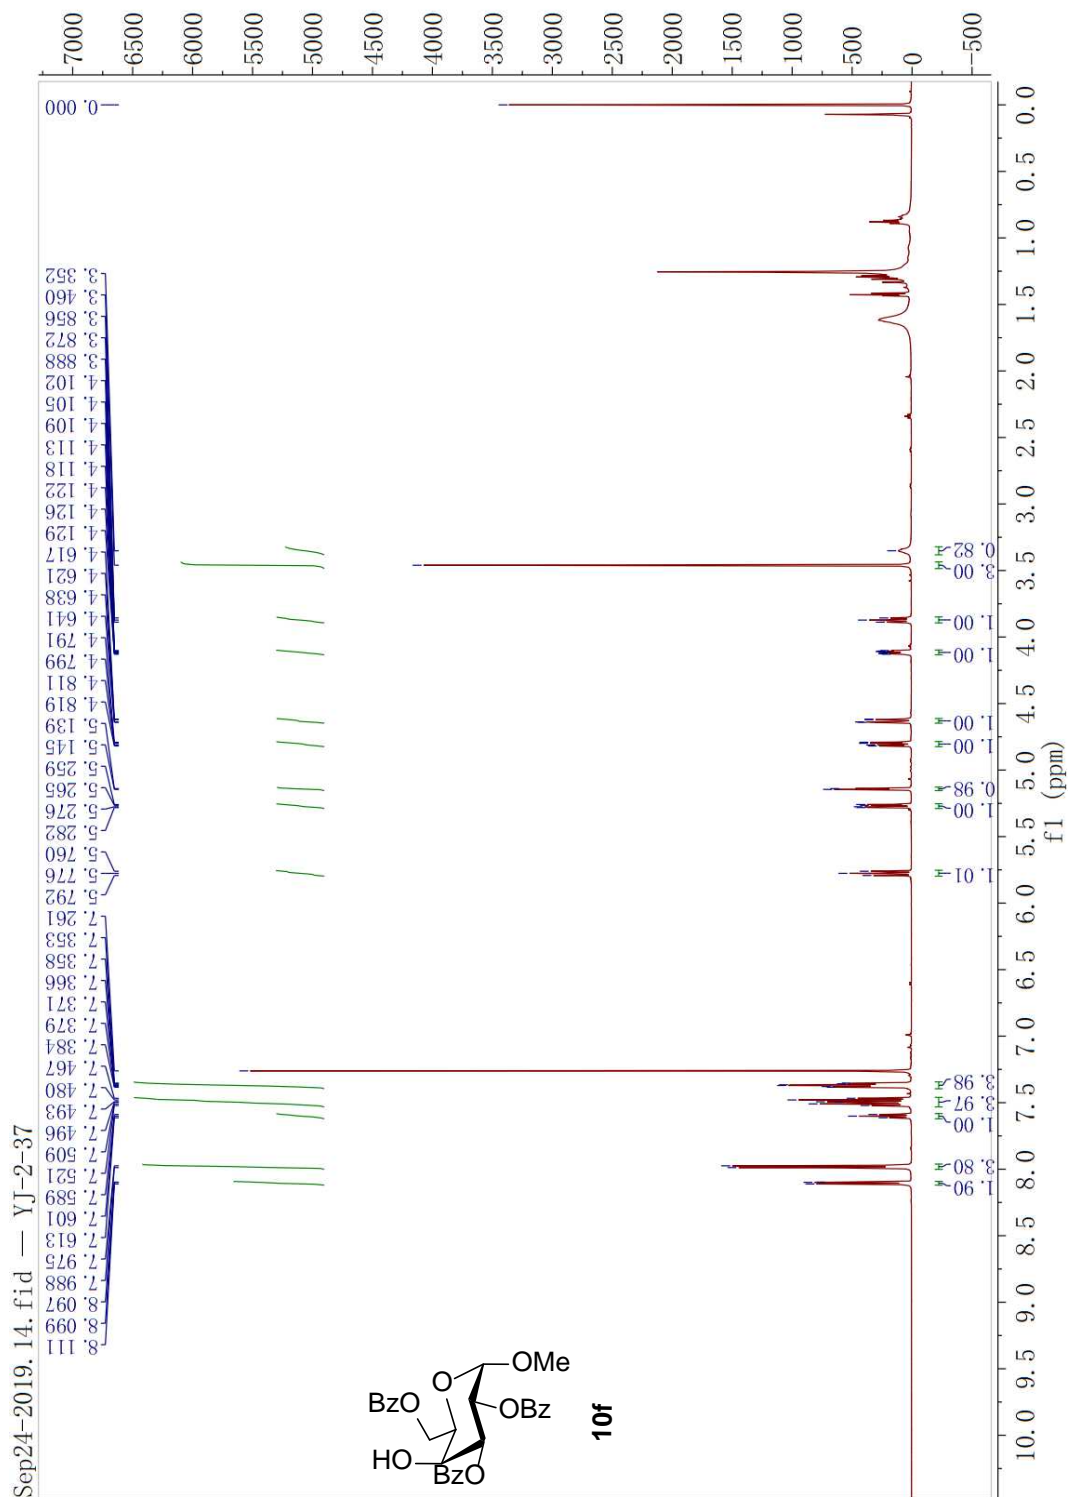

**10f** <sup>1</sup>H NMR (600 MHz, CDCl<sub>3</sub>)

# 1,2-*O,O*-Isopropylidene-5-*O*-benzoyl- $\alpha$ -D-xylofuranose (10g)

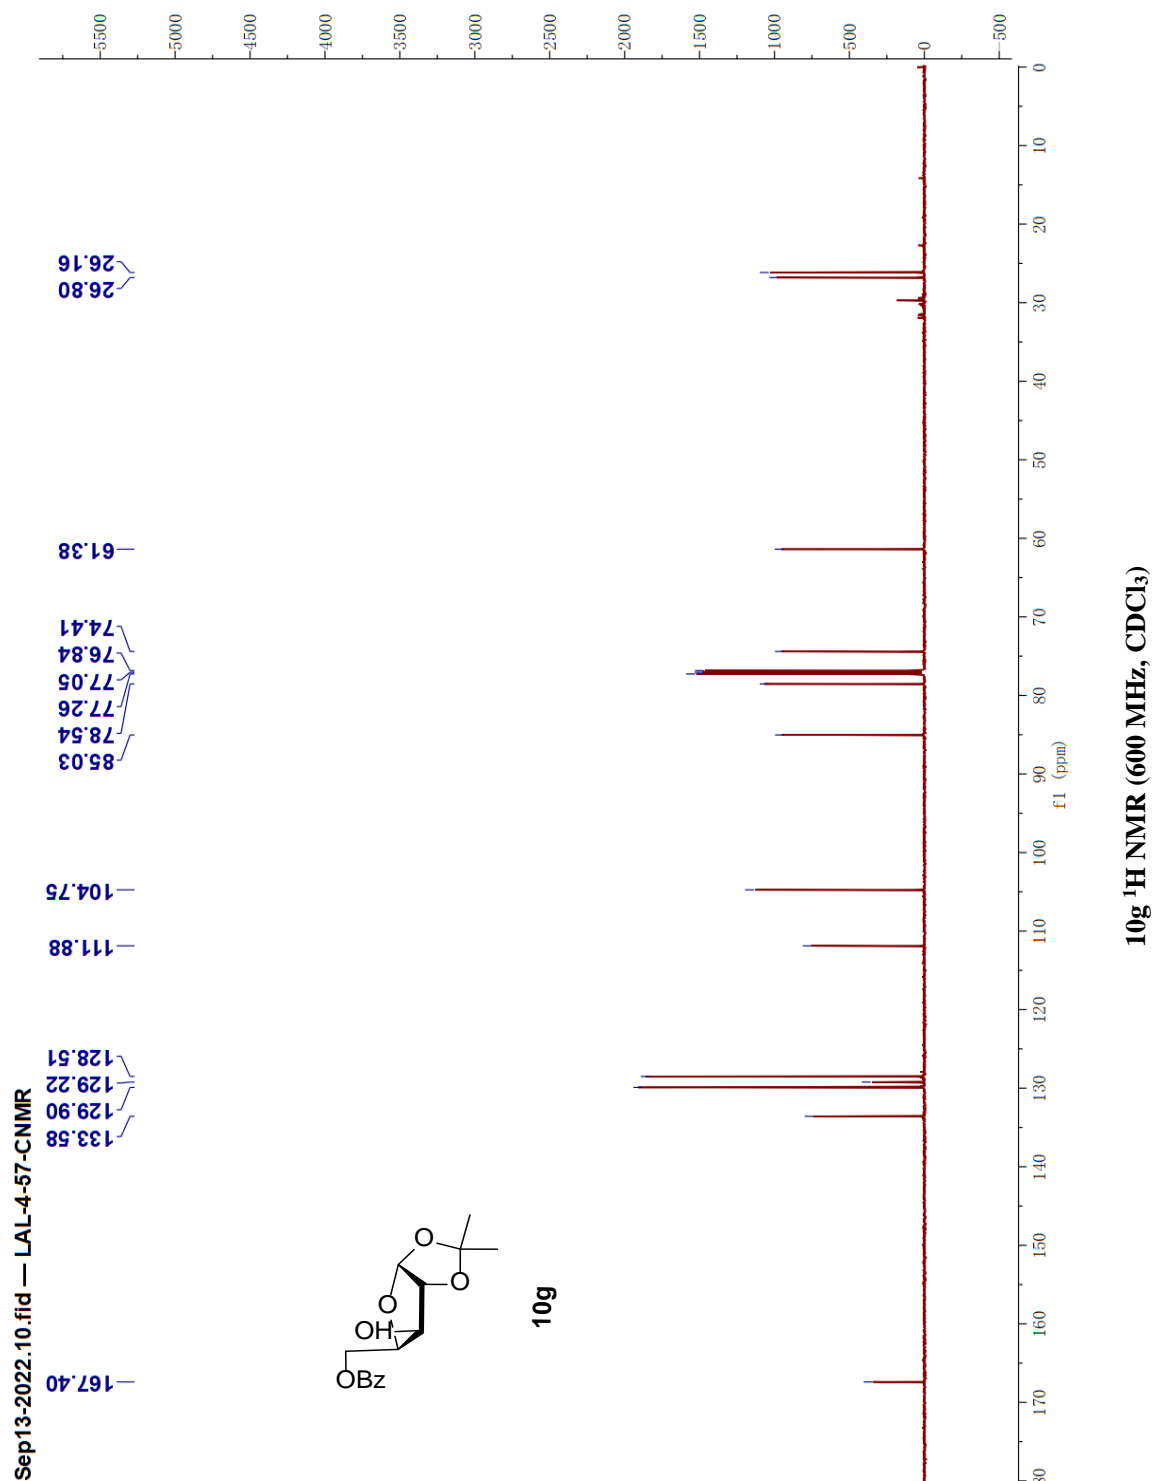

Sep13-2022.9.fid — LAL-4-57-HNMR

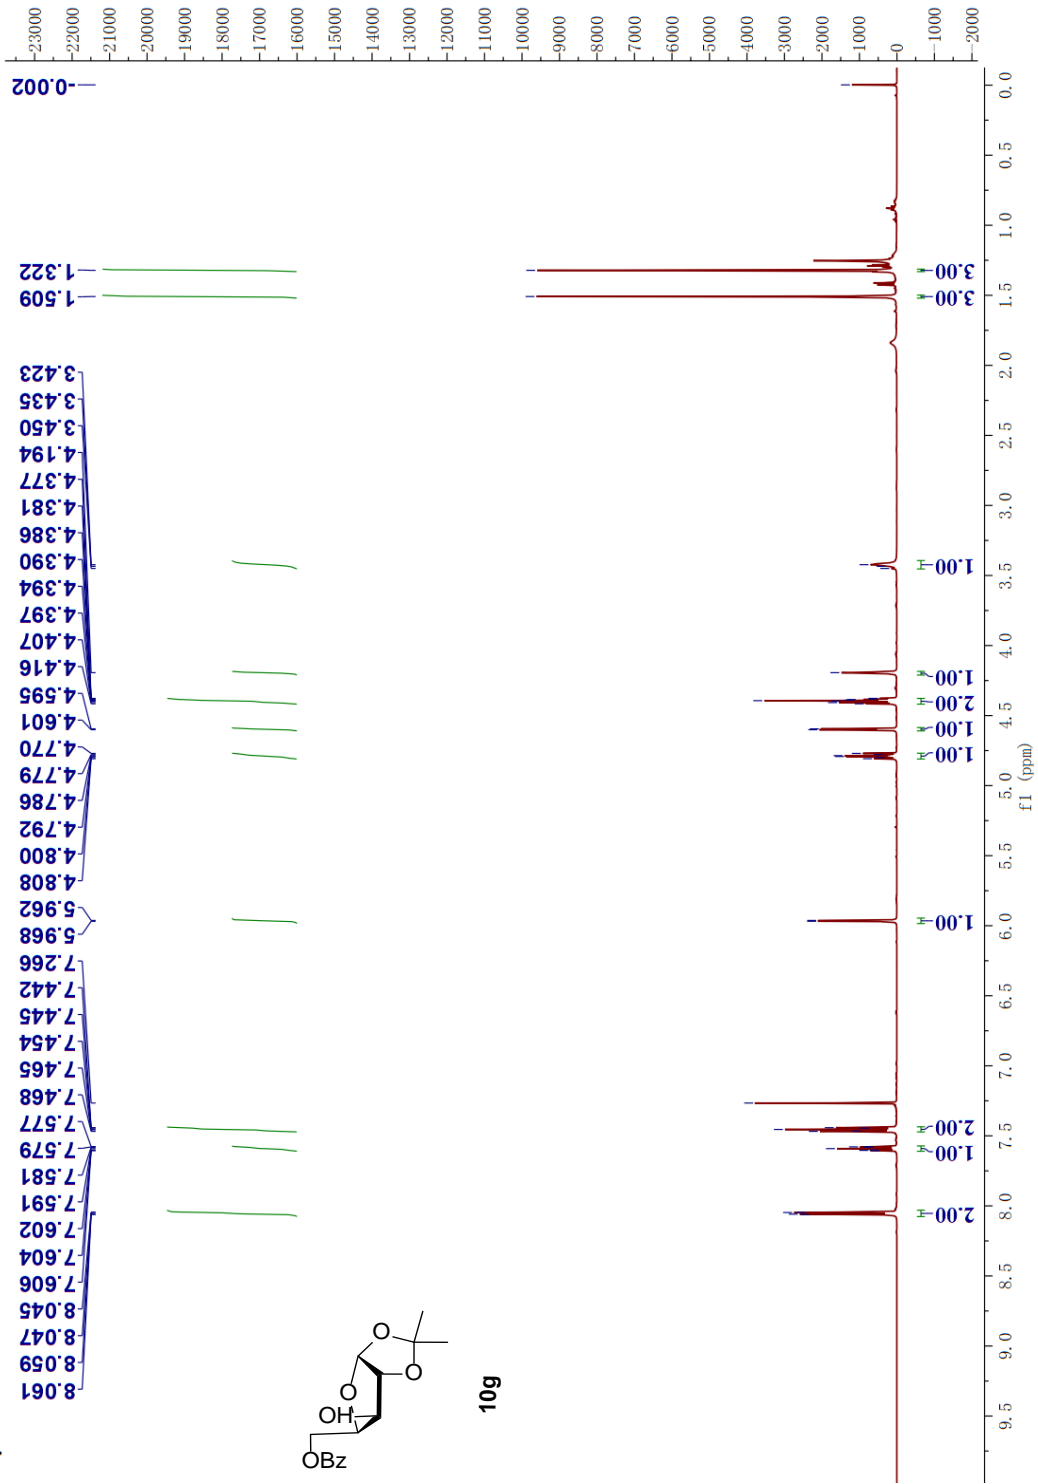

10g <sup>1</sup>H NMR (600 MHz, CDCl<sub>3</sub>)



# Methyl 2,3,6-tri-O-benzoyl- $\alpha$ -D-mannopyranoside (10h)

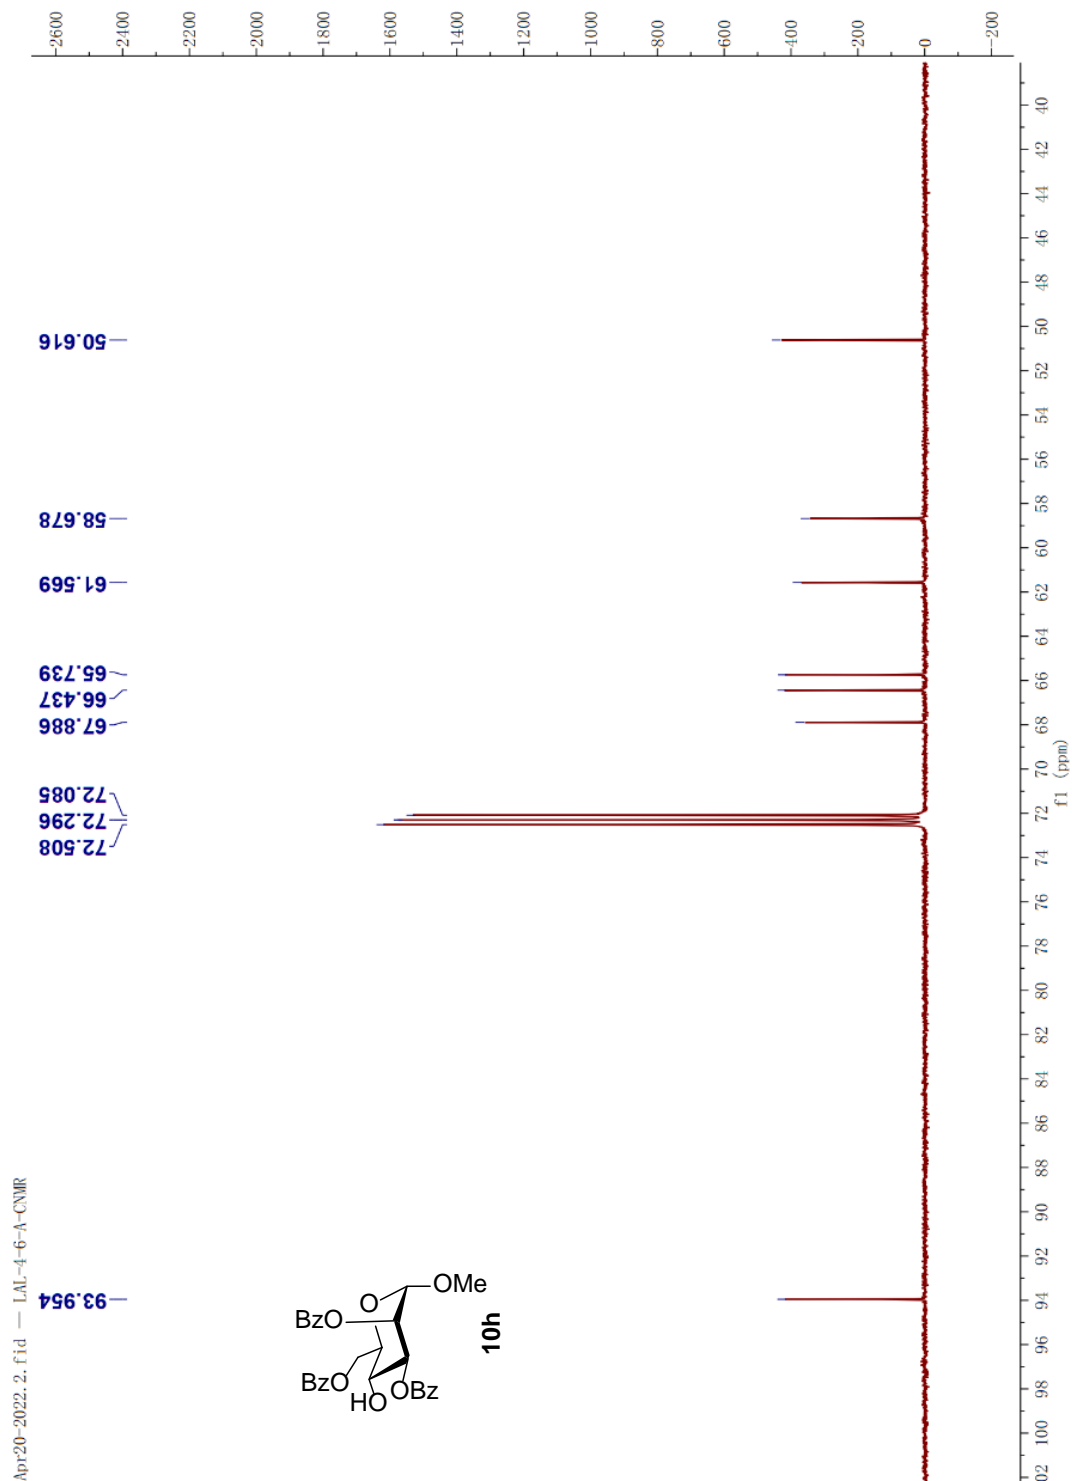

Apr20-2022. 2. fid - LAL-4-6-A-CNMR

Apr19-2022, 14, f1d — LAL-4-6-A

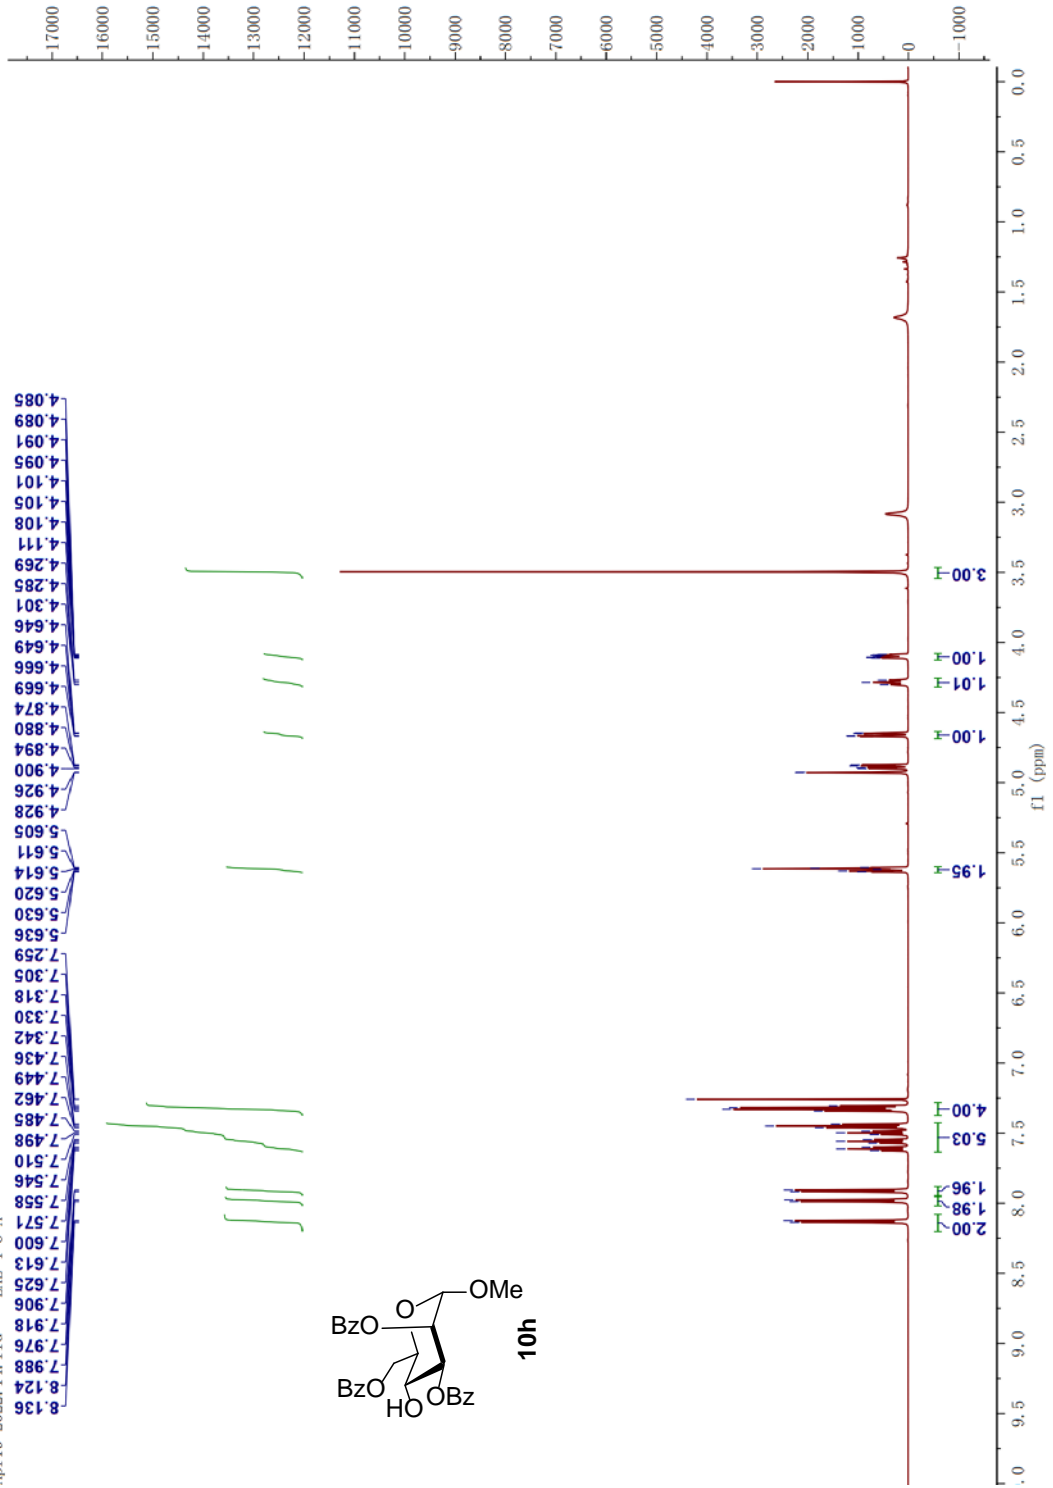

10h <sup>1</sup>H NMR (600 MHz, CDCl<sub>3</sub>)

methyl 2,3,4-*tri-O*-benzoyl- $\alpha$ -D-glucopyranoside (9i) and Methyl 2,3,6-*tri-O*-benzoyl- $\alpha$ -D-glucopyranoside (10i)

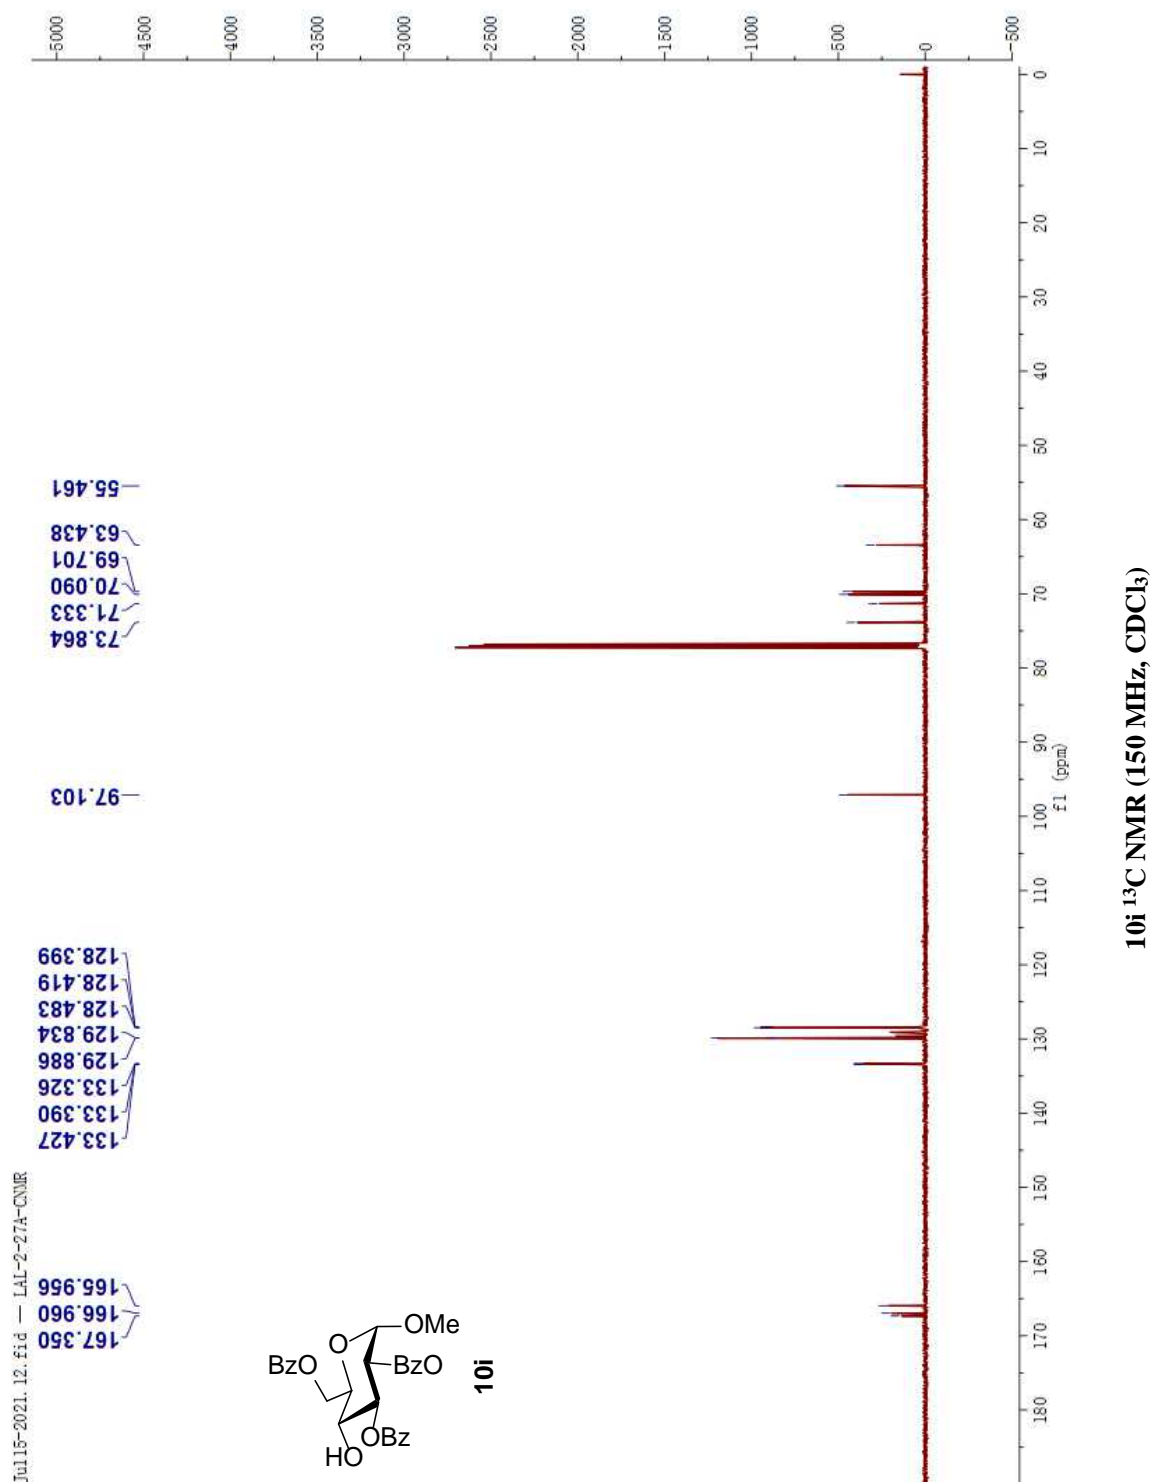

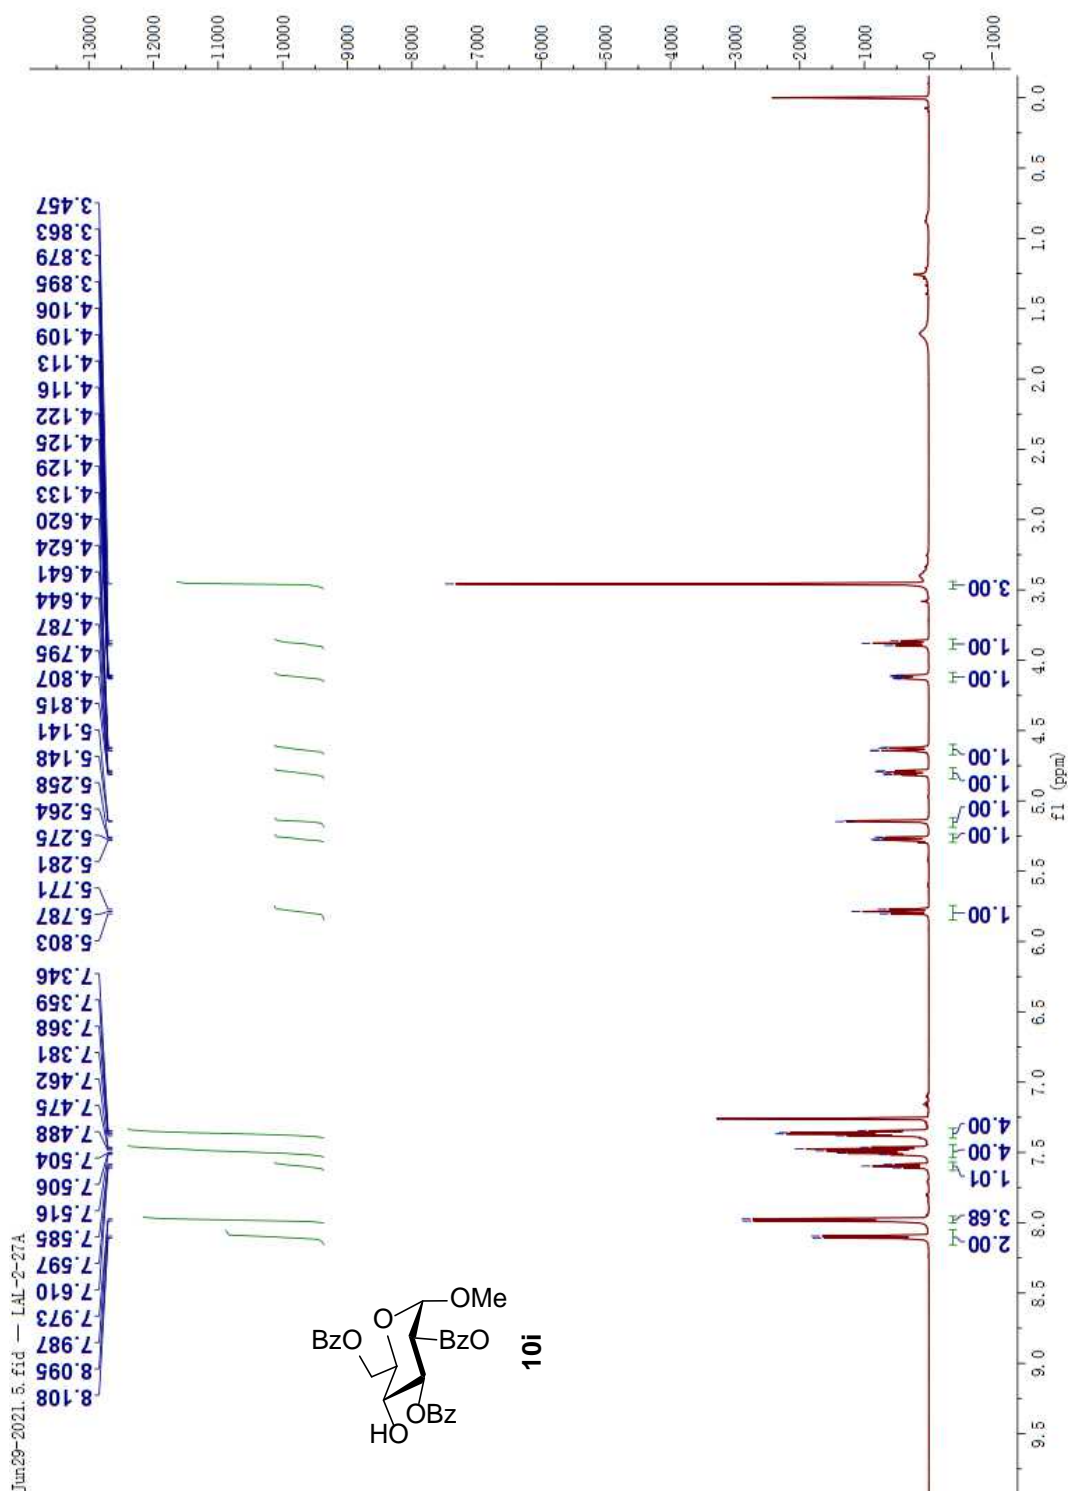

(±)-[(3*aRS*,4*SR*,5*RS*,6*aSR*)-5-Hydroxy-2-oxohexahydro-2*H*-cyclopenta[*b*]furan-4-yl] methyl benzoate (**10j**)

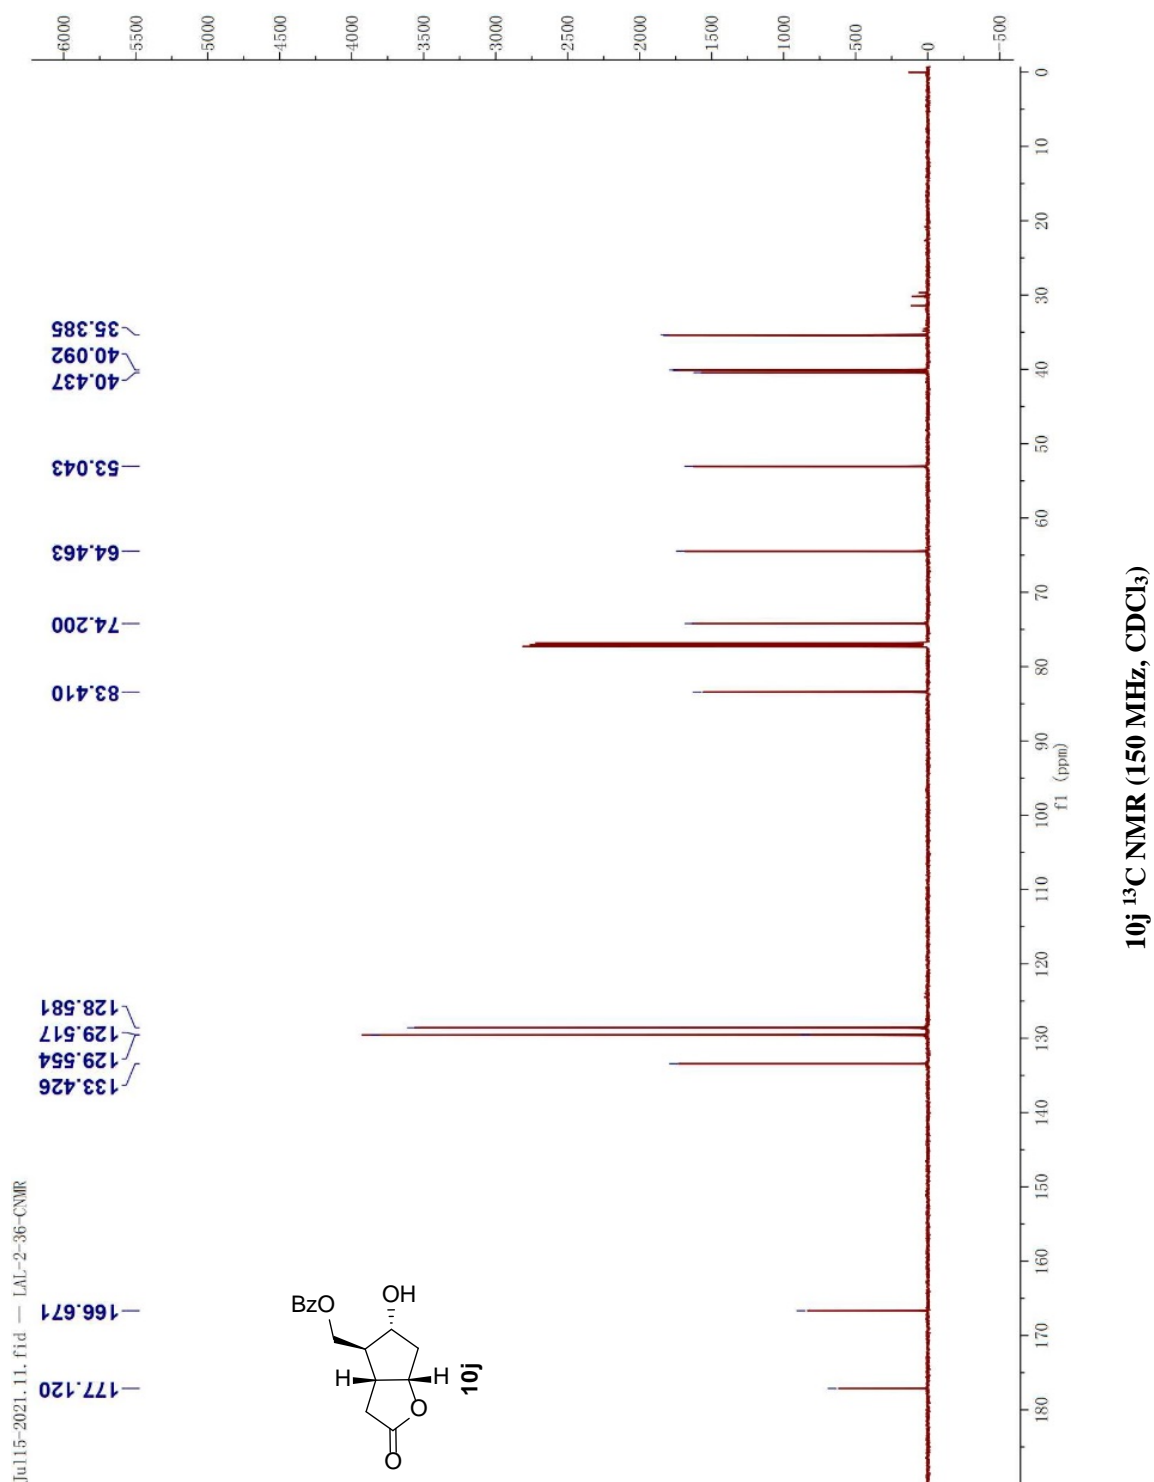

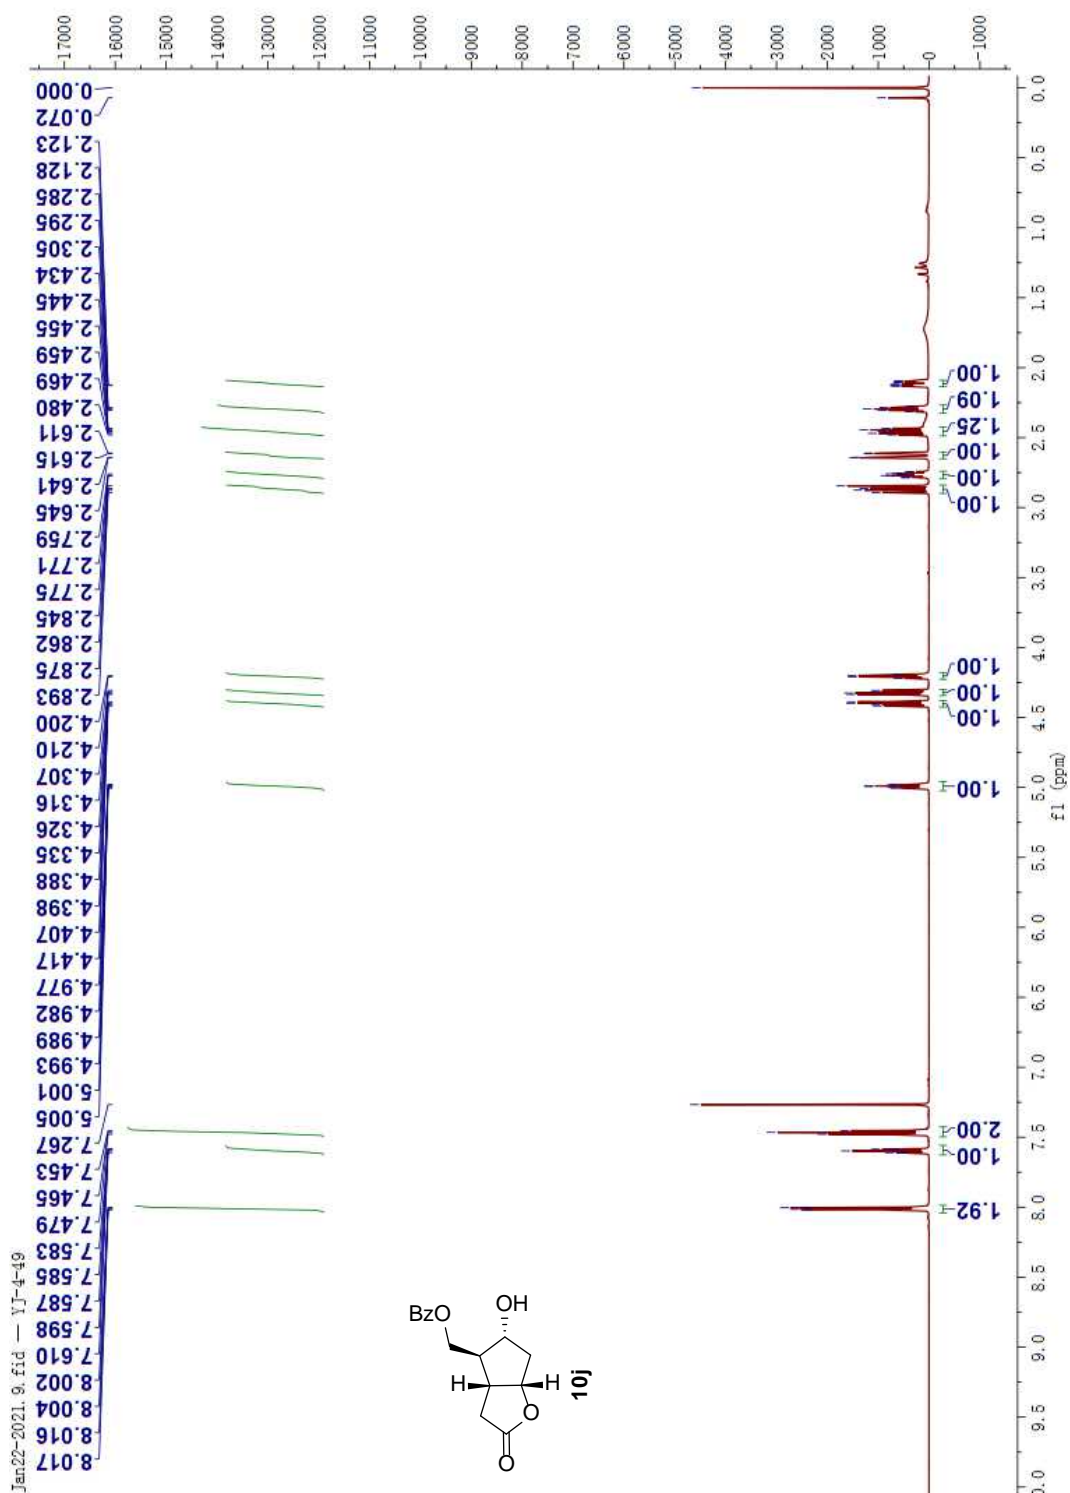

10j <sup>1</sup>H NMR (600 MHz, CDCl<sub>3</sub>)

# Methyl 2,3-di-O-benzoyl- $\alpha$ -L-arabinofuranoside (9k)

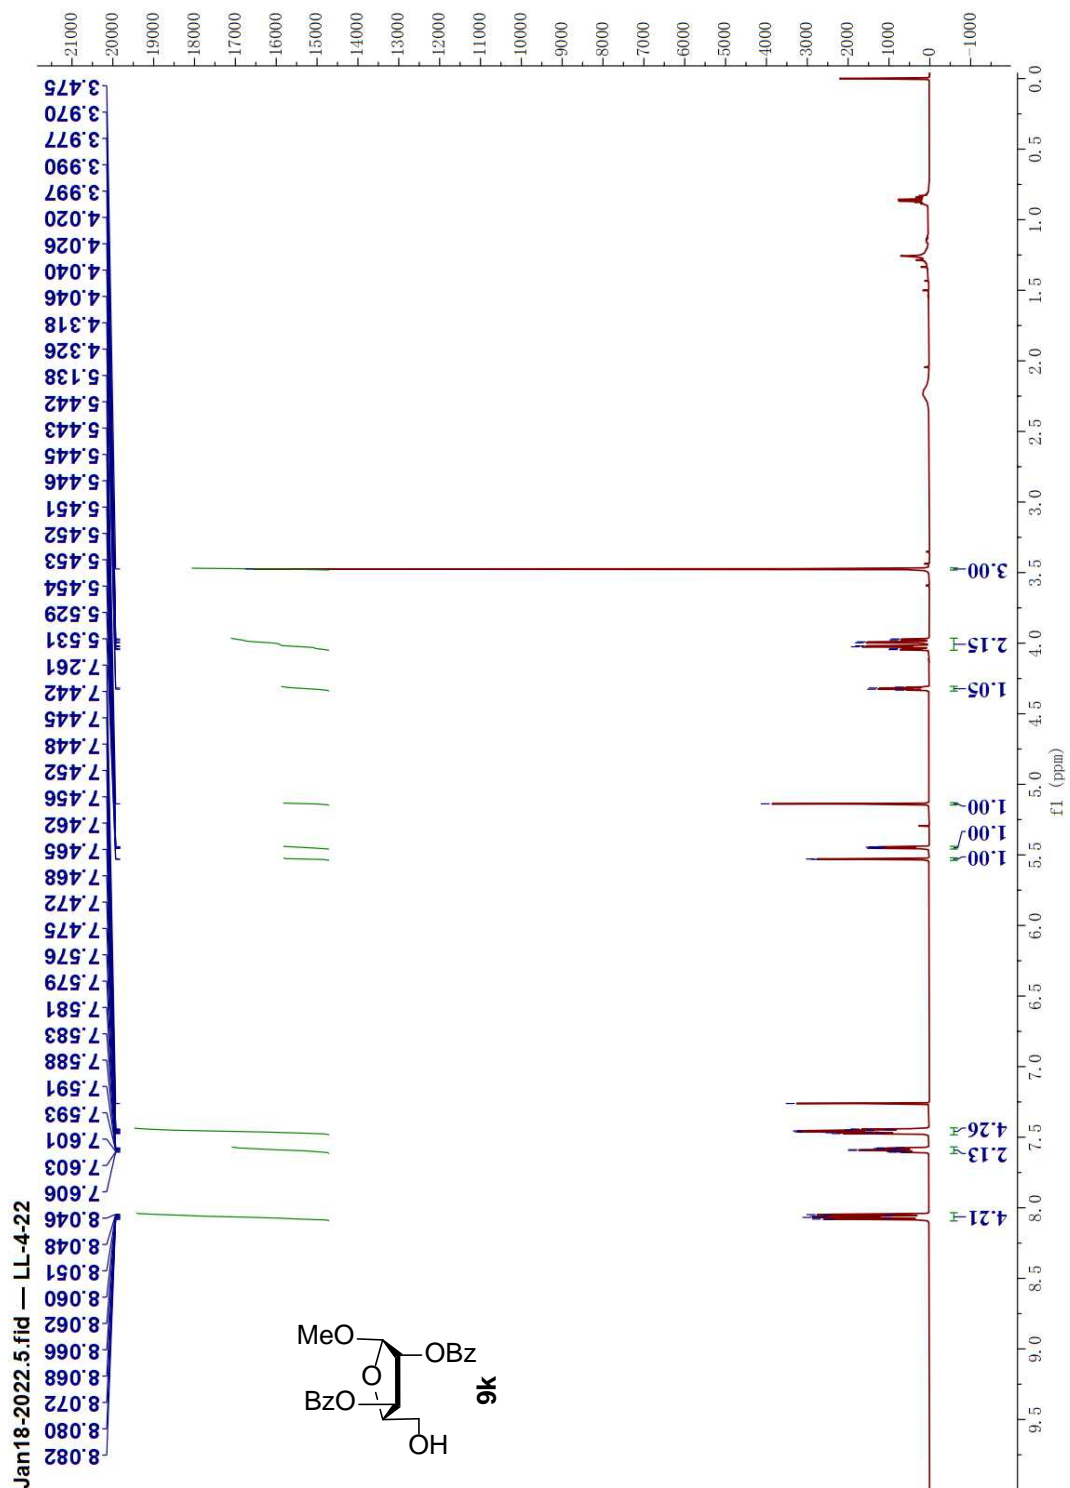

9k  $^1\text{H}$  NMR (600 MHz,  $\text{CDCl}_3$ )

Tolyl 6-*O*-*t*-butyldiphenylsilyl-2,3-*di-O*-benzoyl-1-*thio*- $\beta$ -D-galactopyranoside (101)

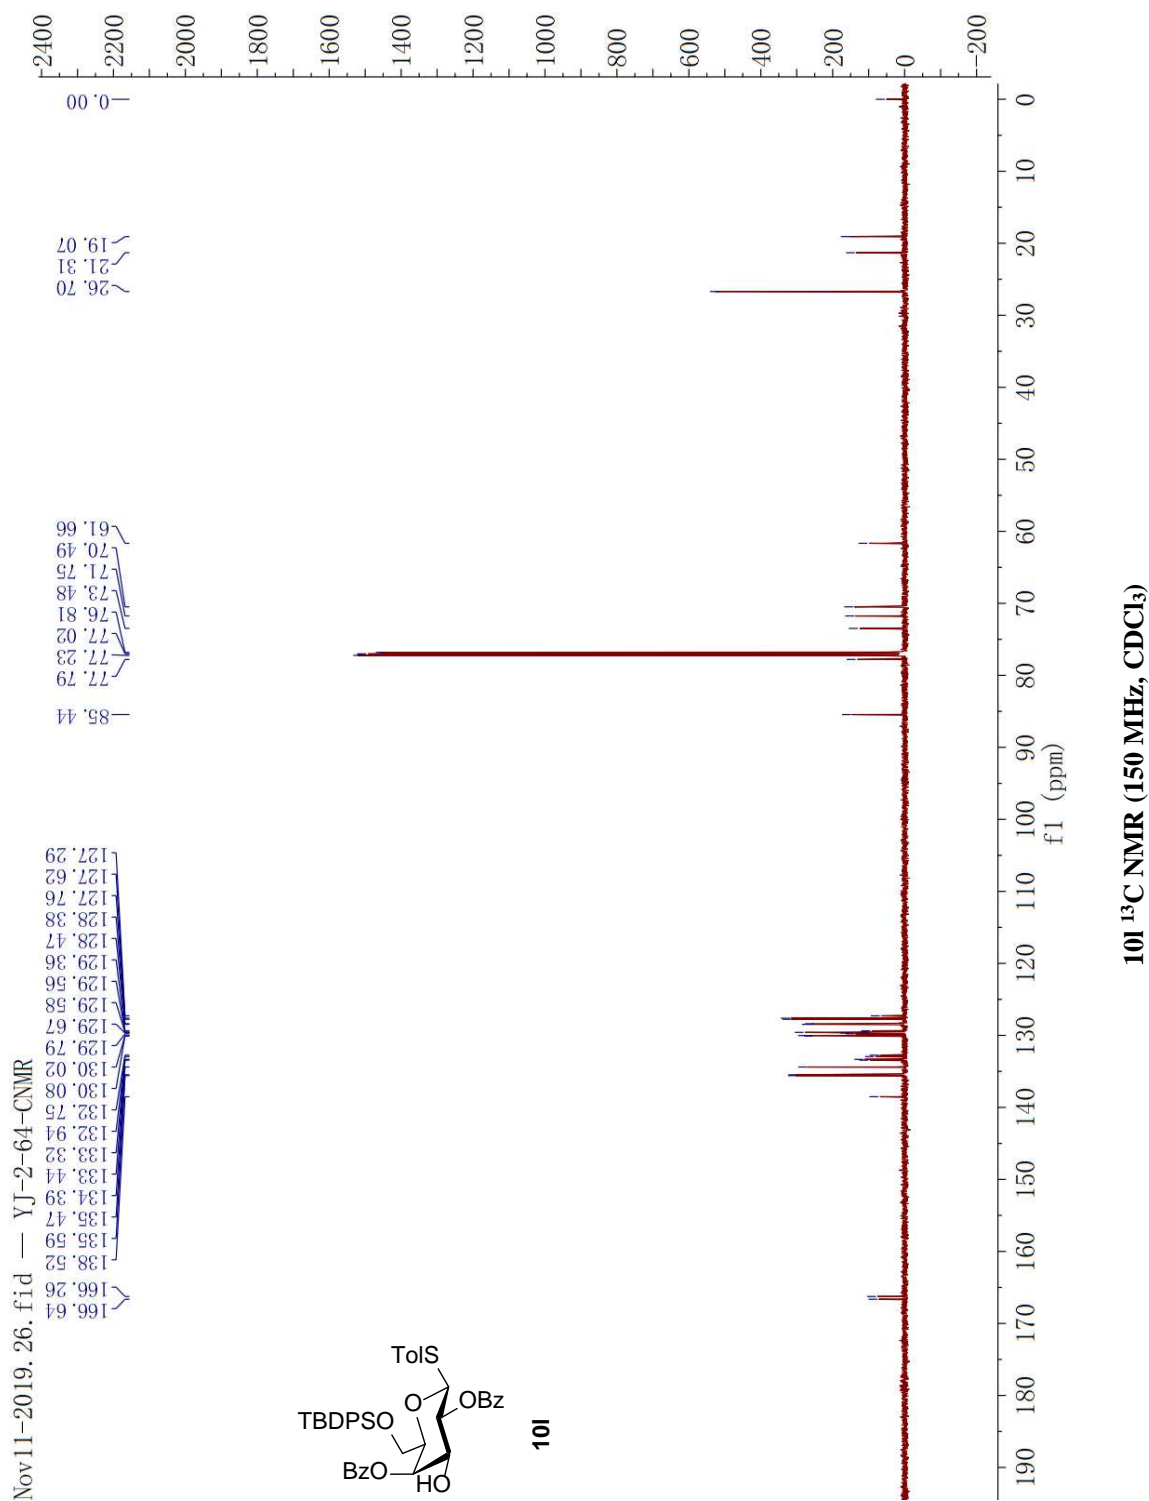



Nov 11-2019, 25. f1 d — YJ-2-64-HNMR

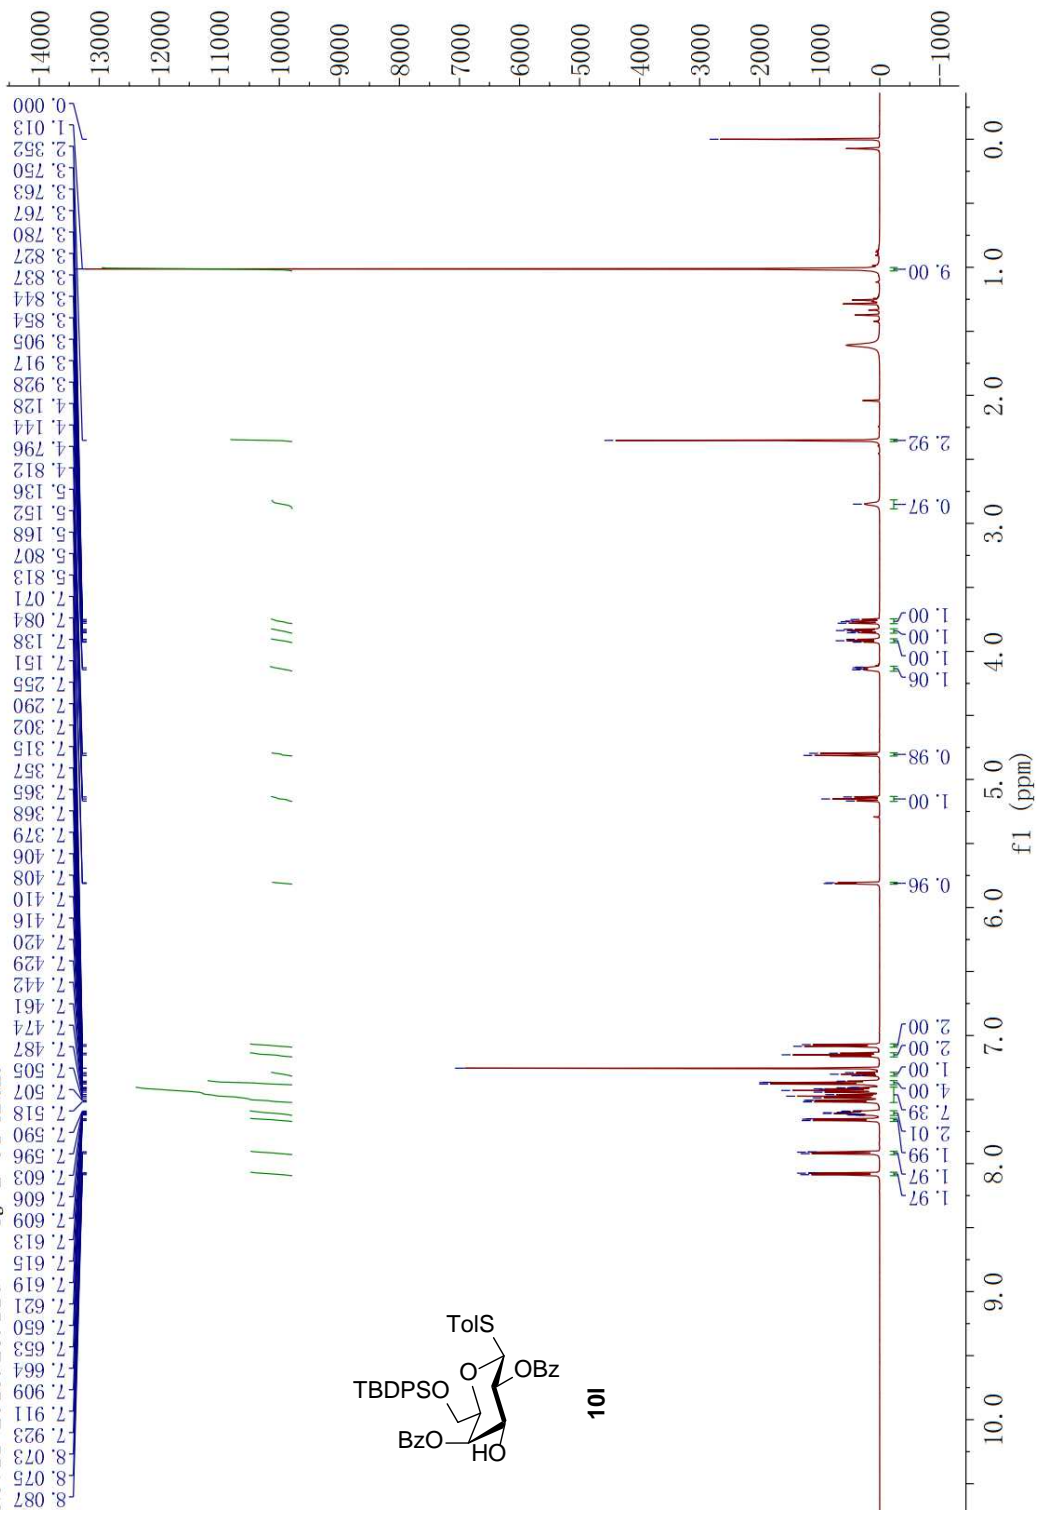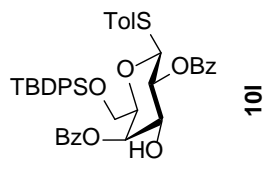

101 <sup>1</sup>H NMR (600 MHz, CDCl<sub>3</sub>)

# Methyl 2,4-di-O-benzoyl- $\alpha$ -L-rhamnopyranoside (10m)

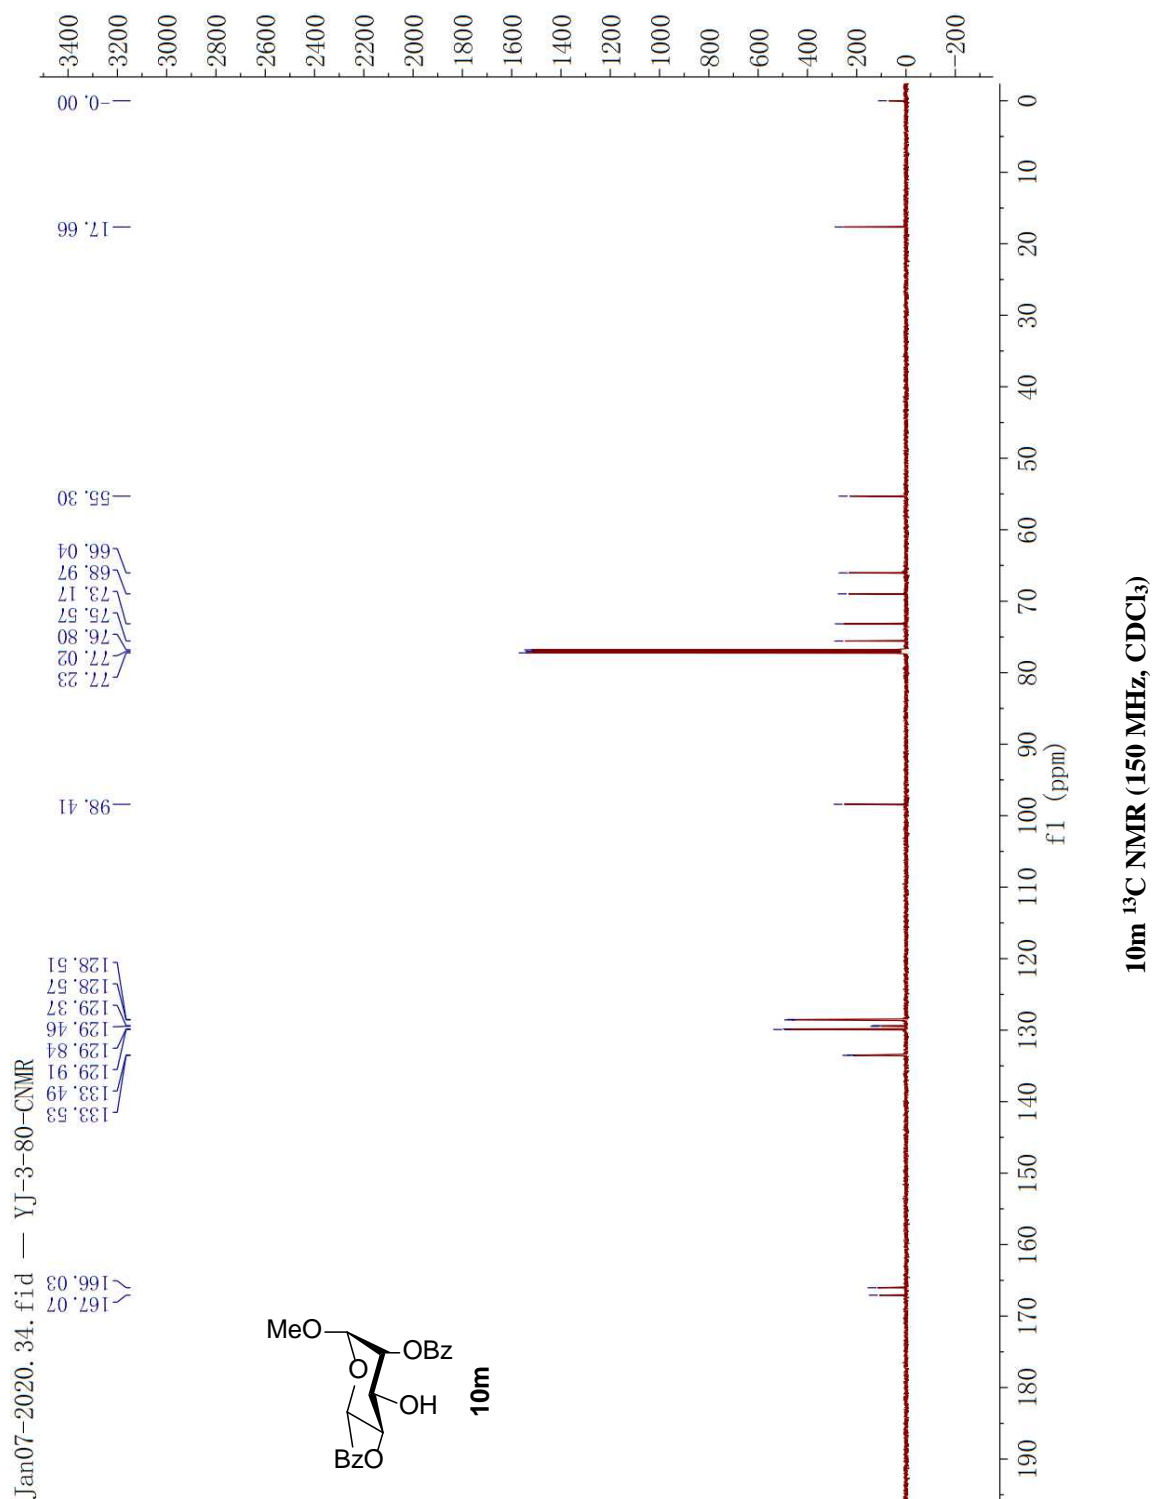

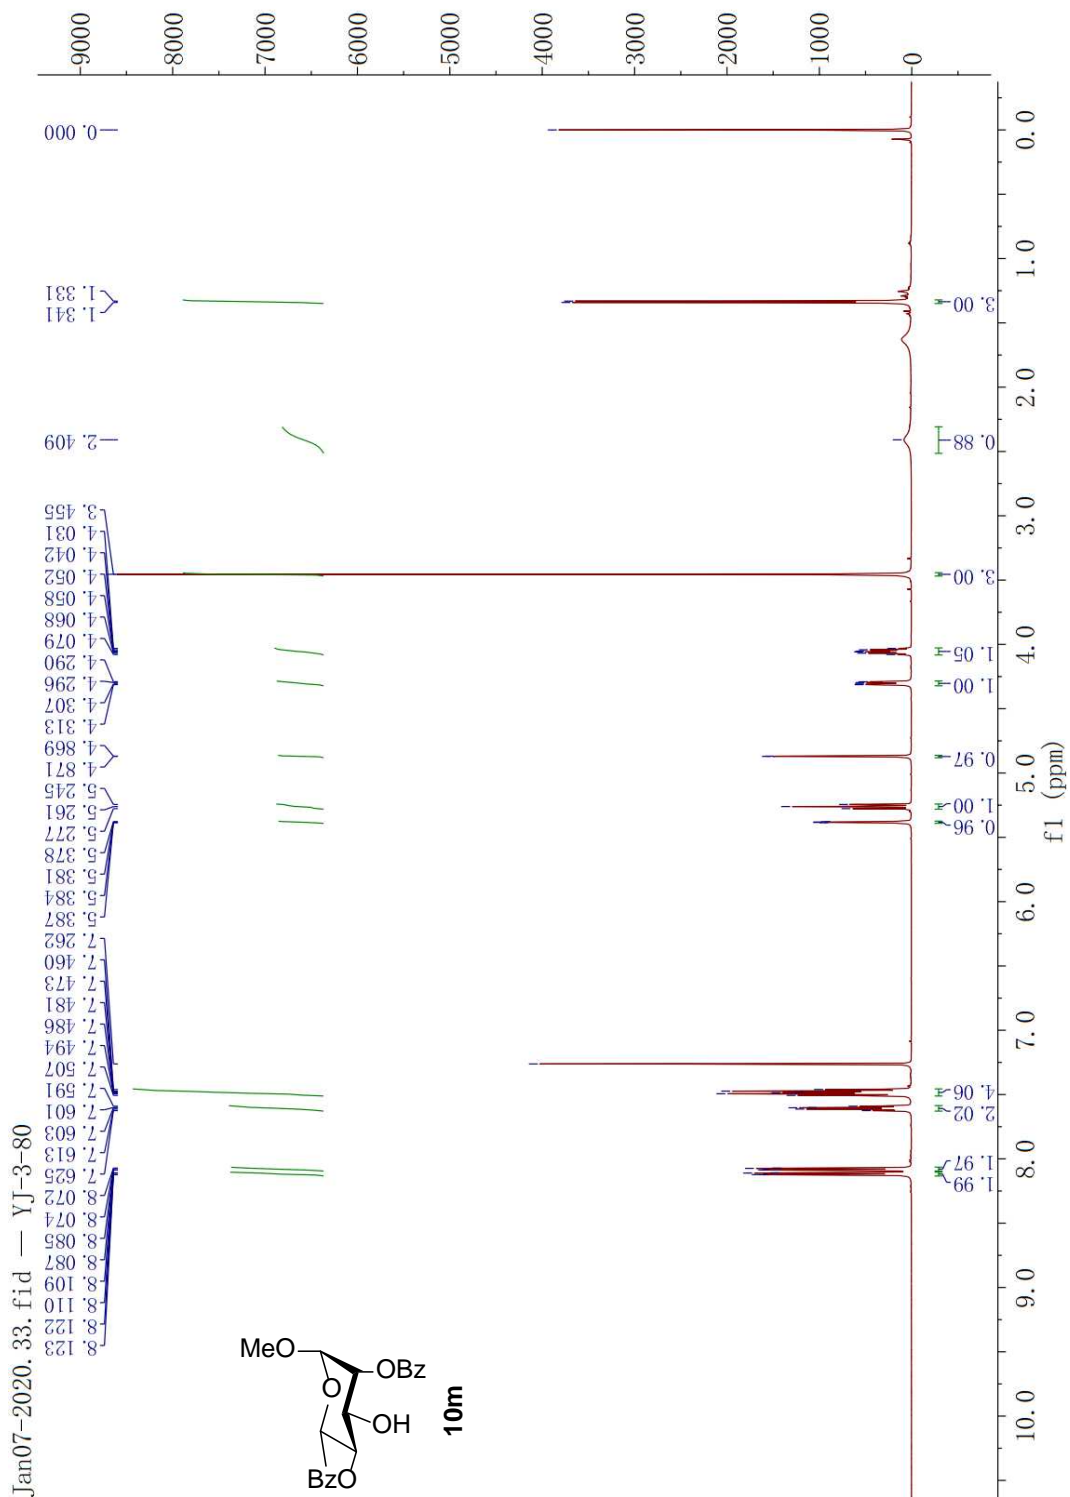

6-*O*-*tert*-Butyldiphenylsilyl-2,3,5-*tri-O*-benzoyl-1-*thio*- $\beta$ -D-galactofuranoside (11)

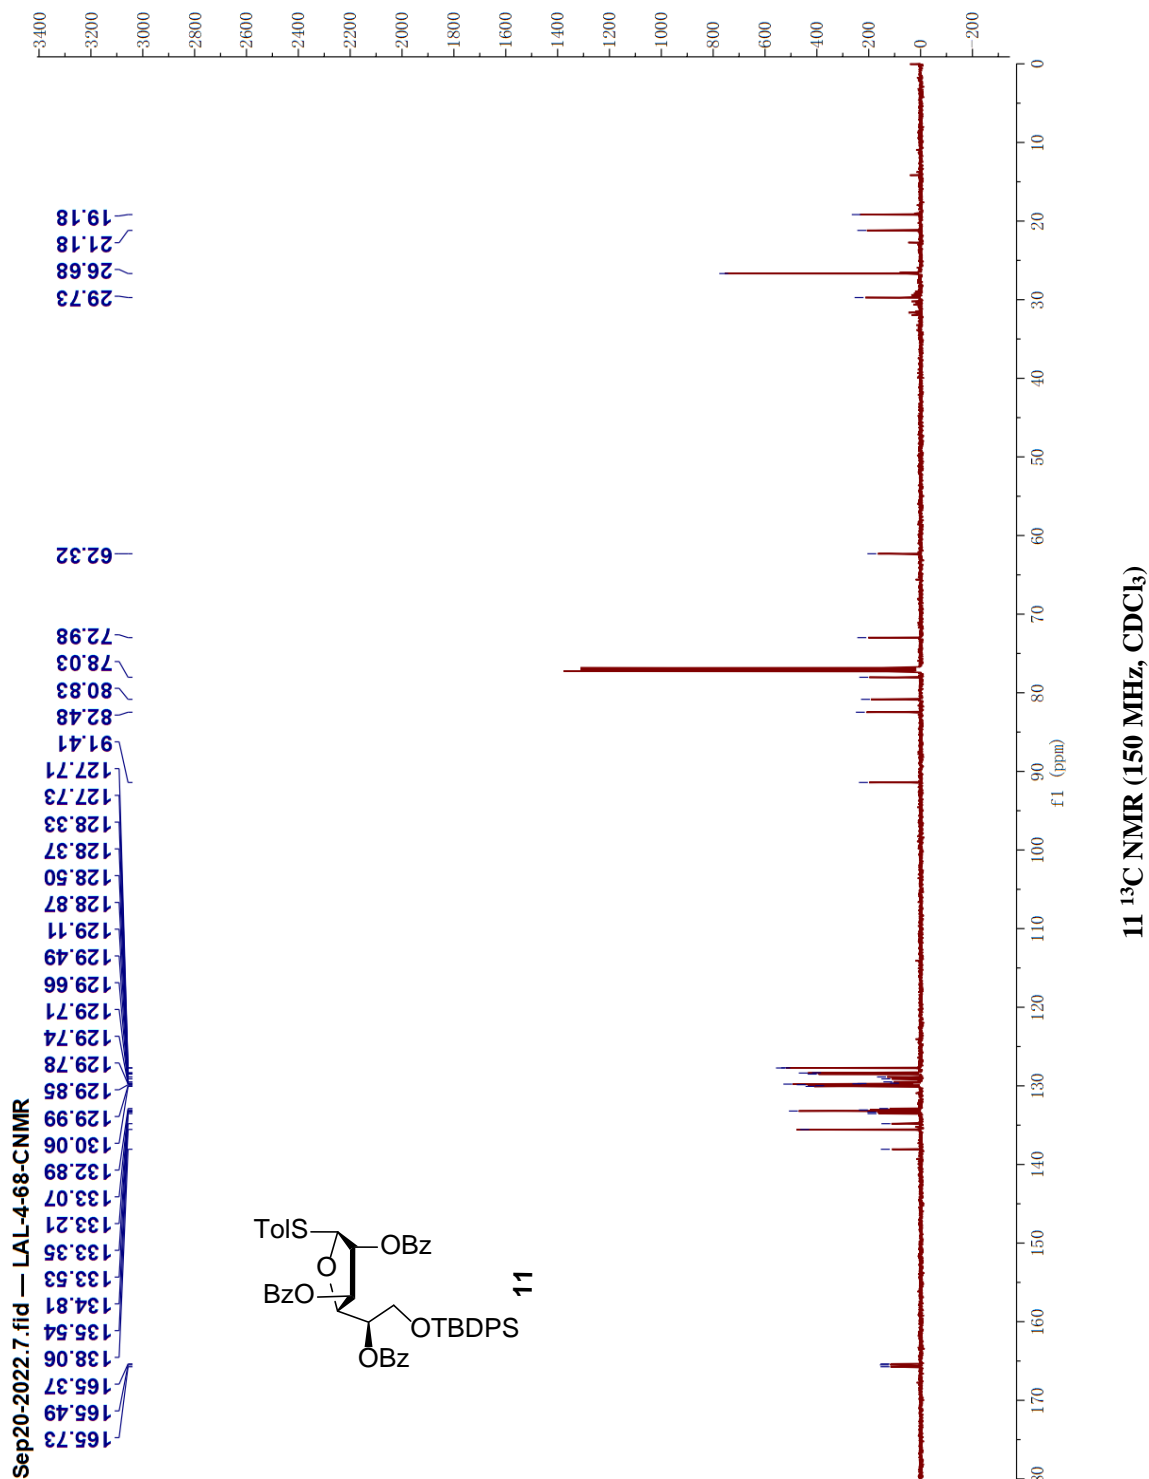

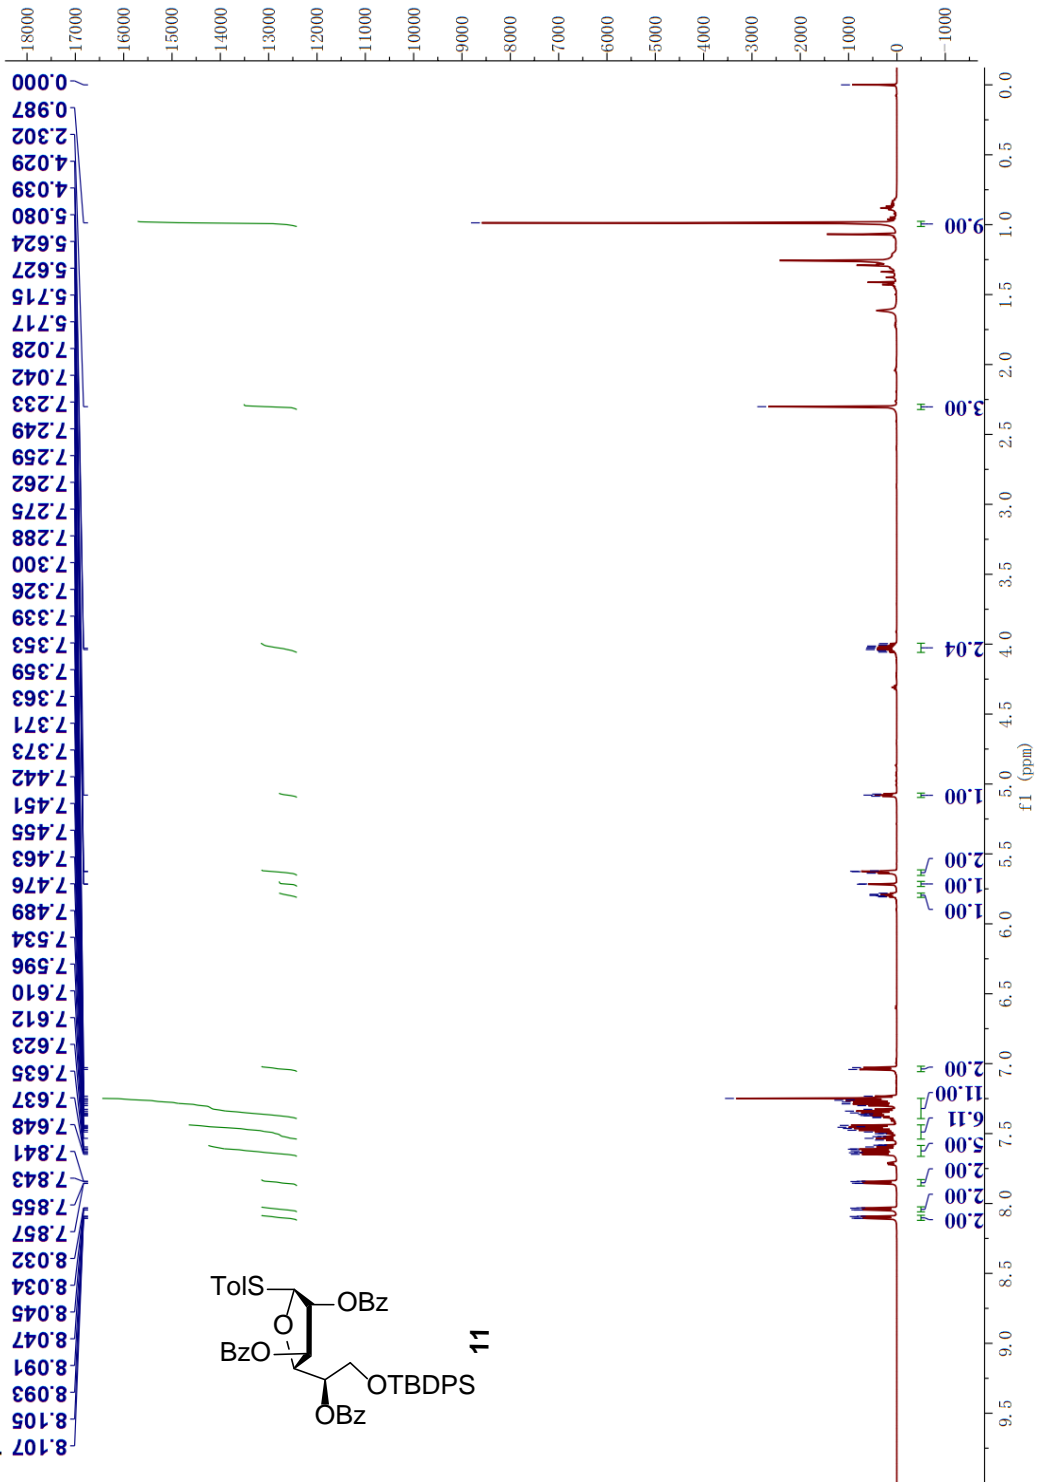

11 <sup>1</sup>H NMR (600 MHz, CDCl<sub>3</sub>)

**Octyl 6-*O*-*tert*-butyldiphenylsilyl-2,3,5-tri-*O*-benzoyl- $\beta$ -D-galactopyranosyl-(1 $\rightarrow$ 6)-2,3,5-tri-*O*-benzoyl- $\beta$ -D-galactofuranoside (14)**

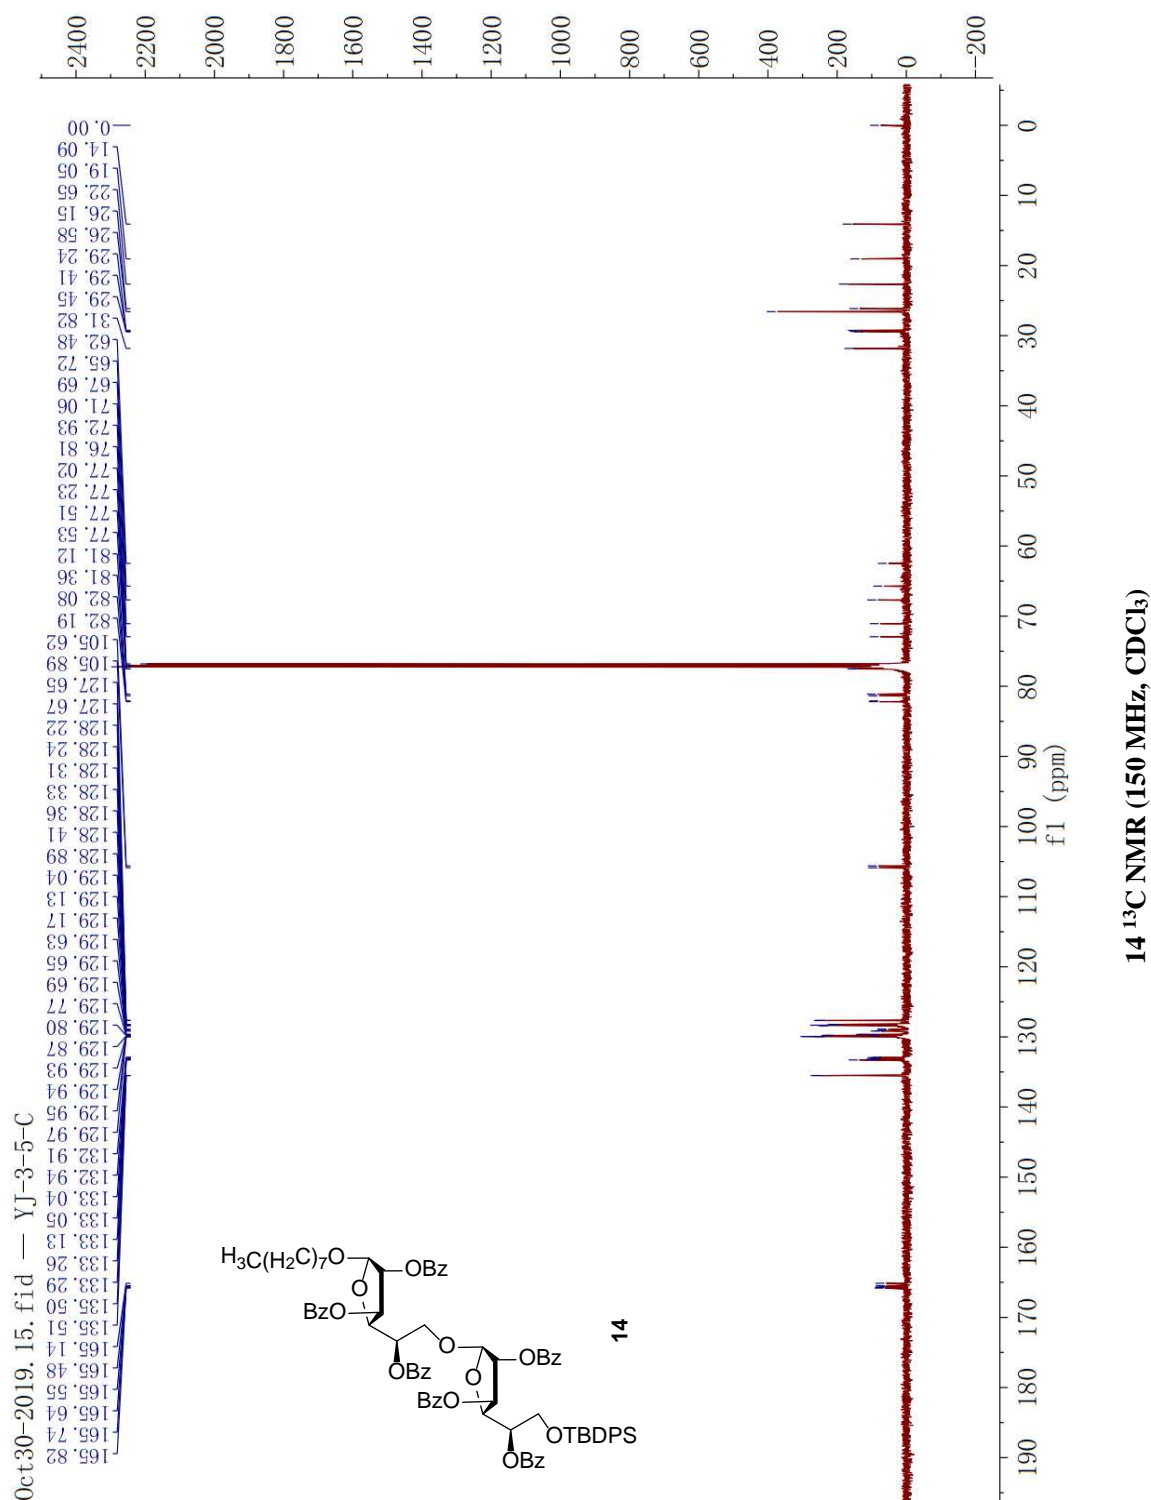

Oct28-2019, 23. fid — YJ-3-5

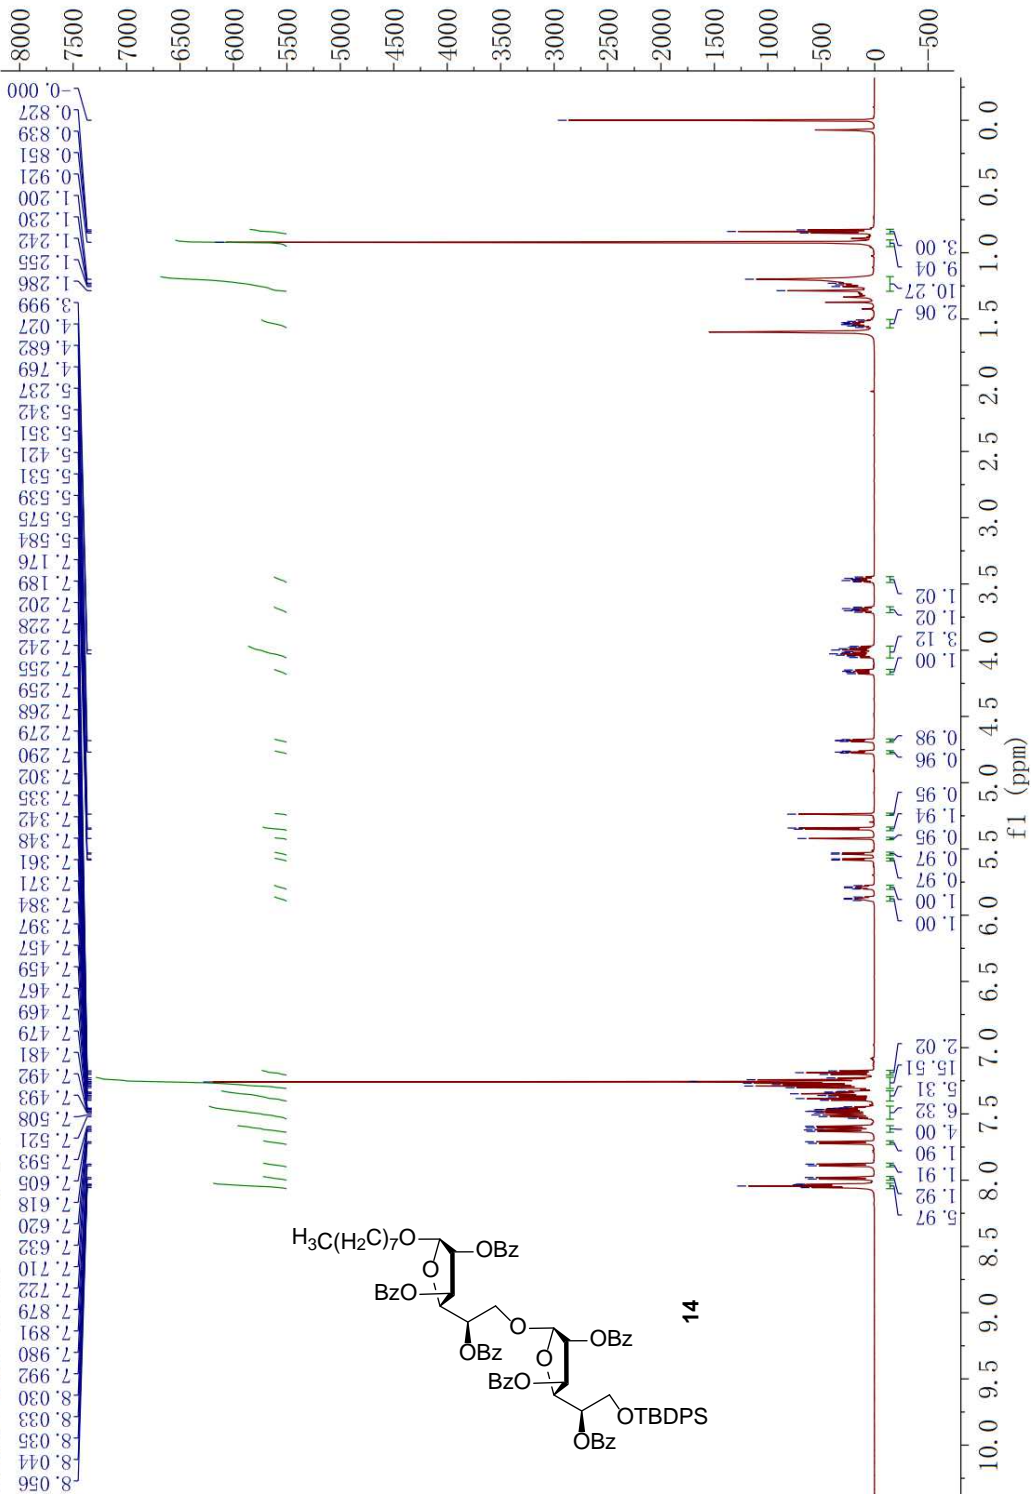

**14** <sup>1</sup>H NMR (600 MHz, CDCl<sub>3</sub>)

**Octyl 2,3,5-tri-O-benzoyl-β-D-galactopyranosyl-(1→6)-2,3,5-tri-O-benzoyl-β-D-galactofuranoside (15)**

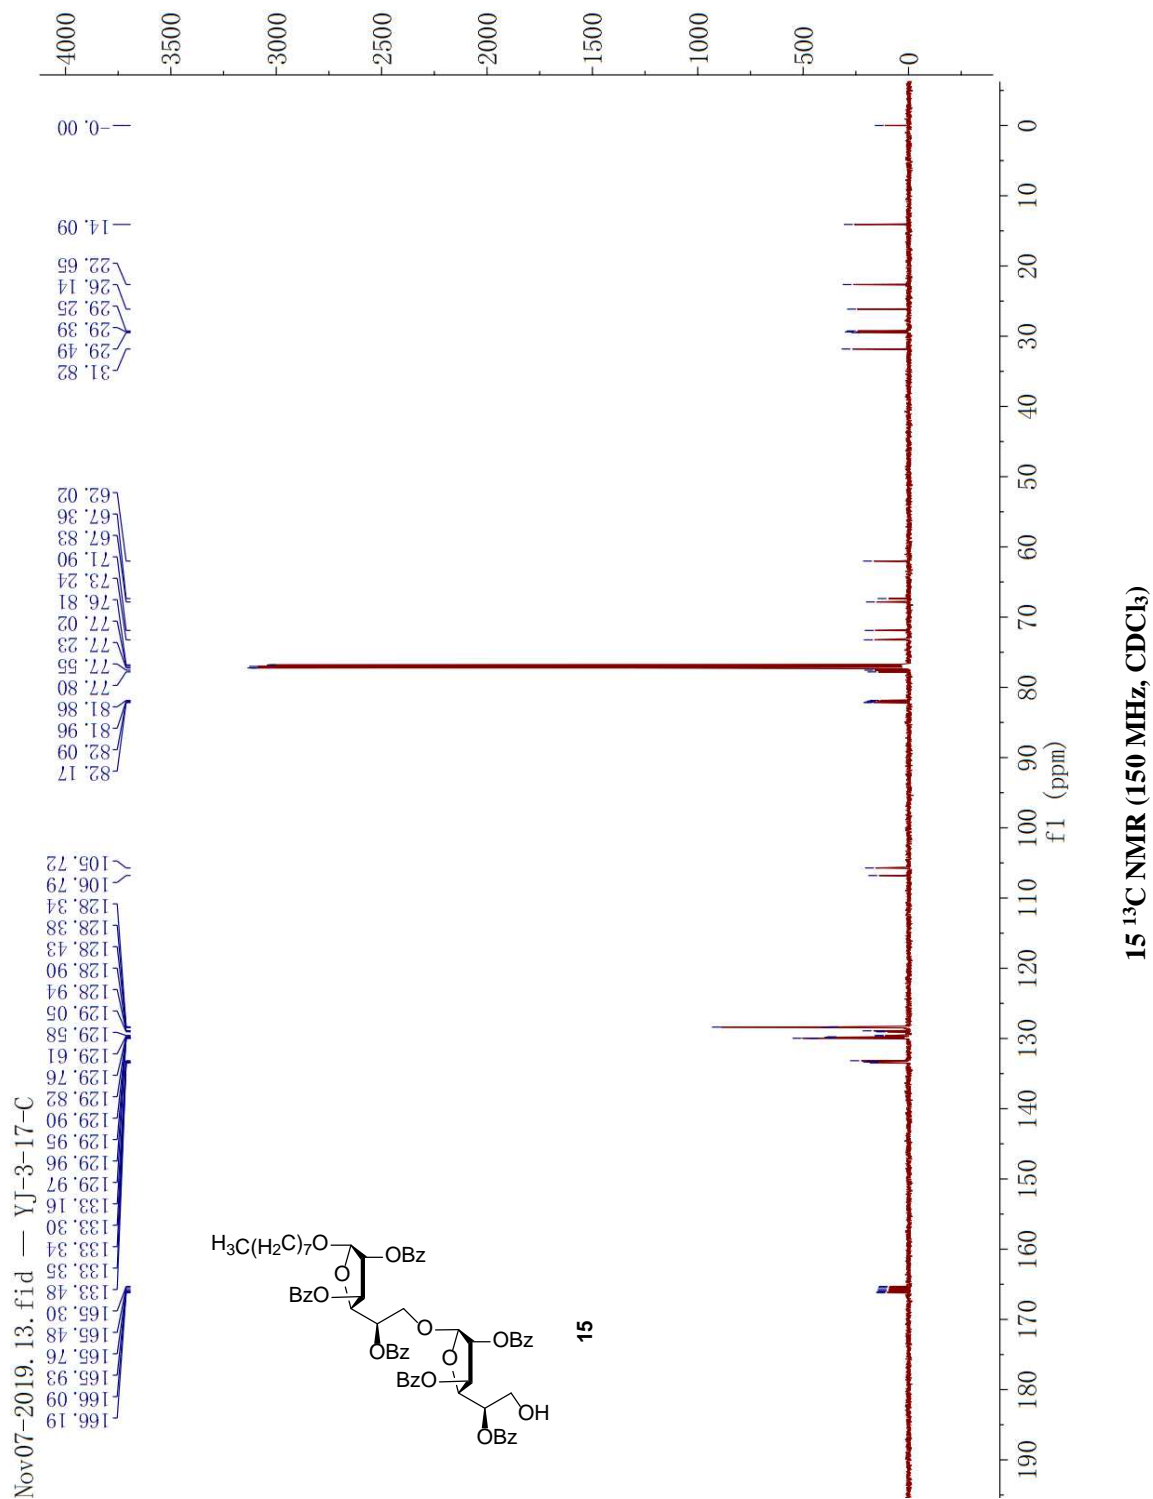



Nov07-2019. 12. fid — YJ-3-17-H

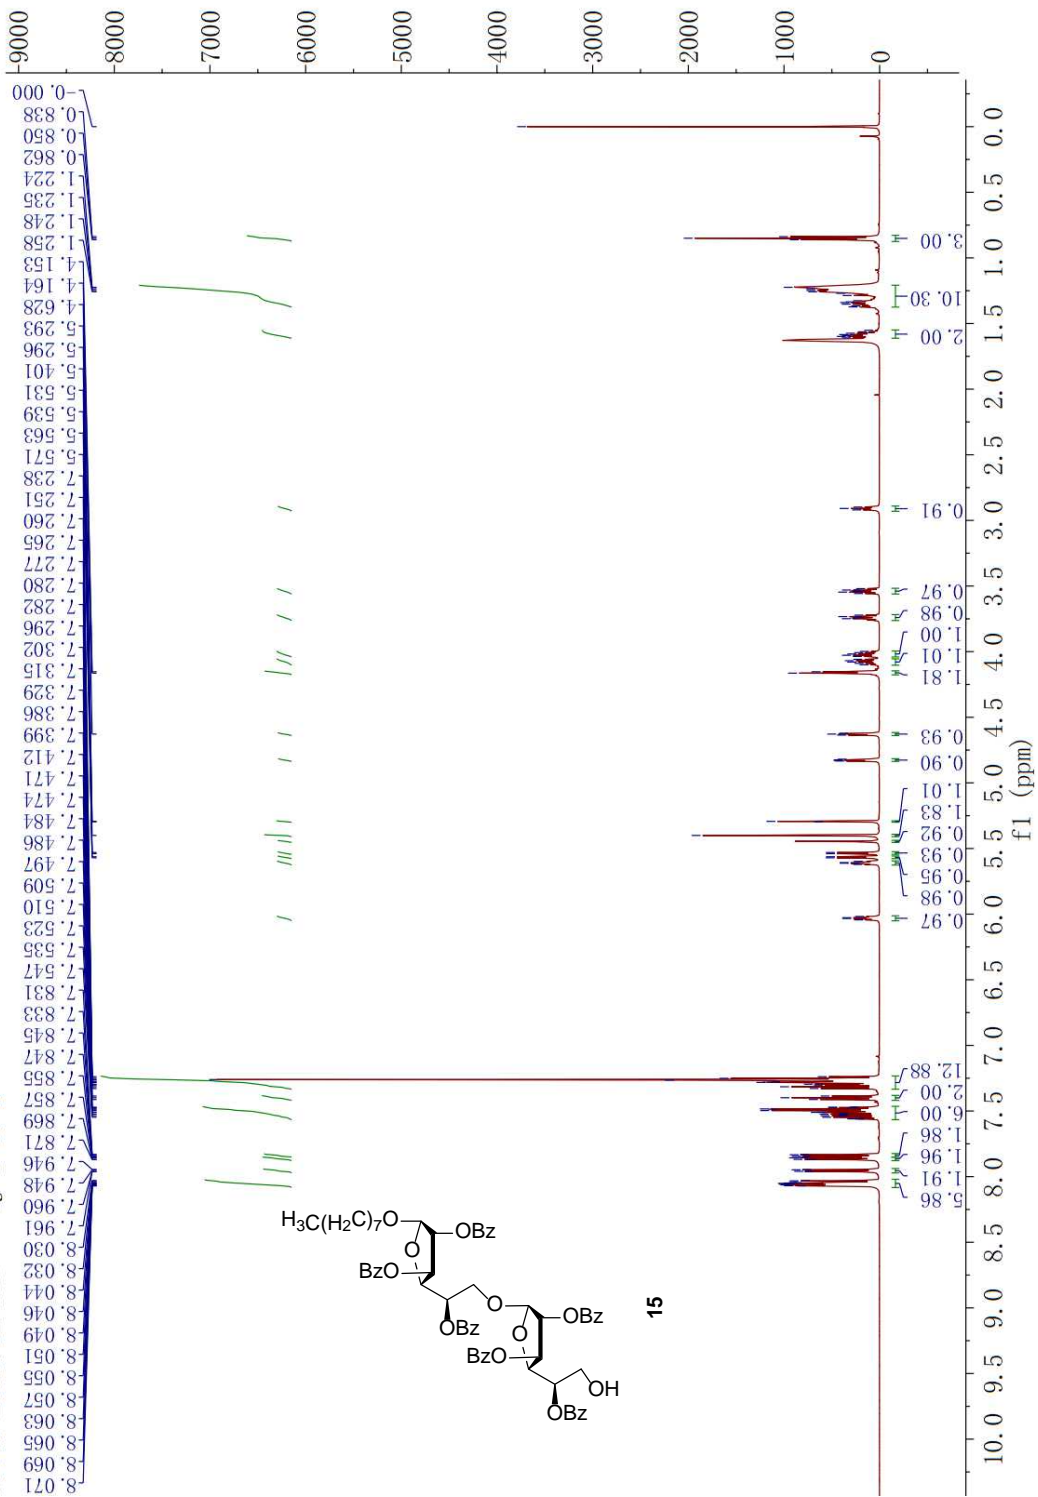

15 <sup>1</sup>H NMR (600 MHz, CDCl<sub>3</sub>)

**Octyl 2,3,6-tri-O-benzoyl- $\beta$ -D-galactopyranosyl-(1 $\rightarrow$ 6)-2,3,5-tri-O-benzoyl- $\beta$ -D-galactofuranoside (16)**

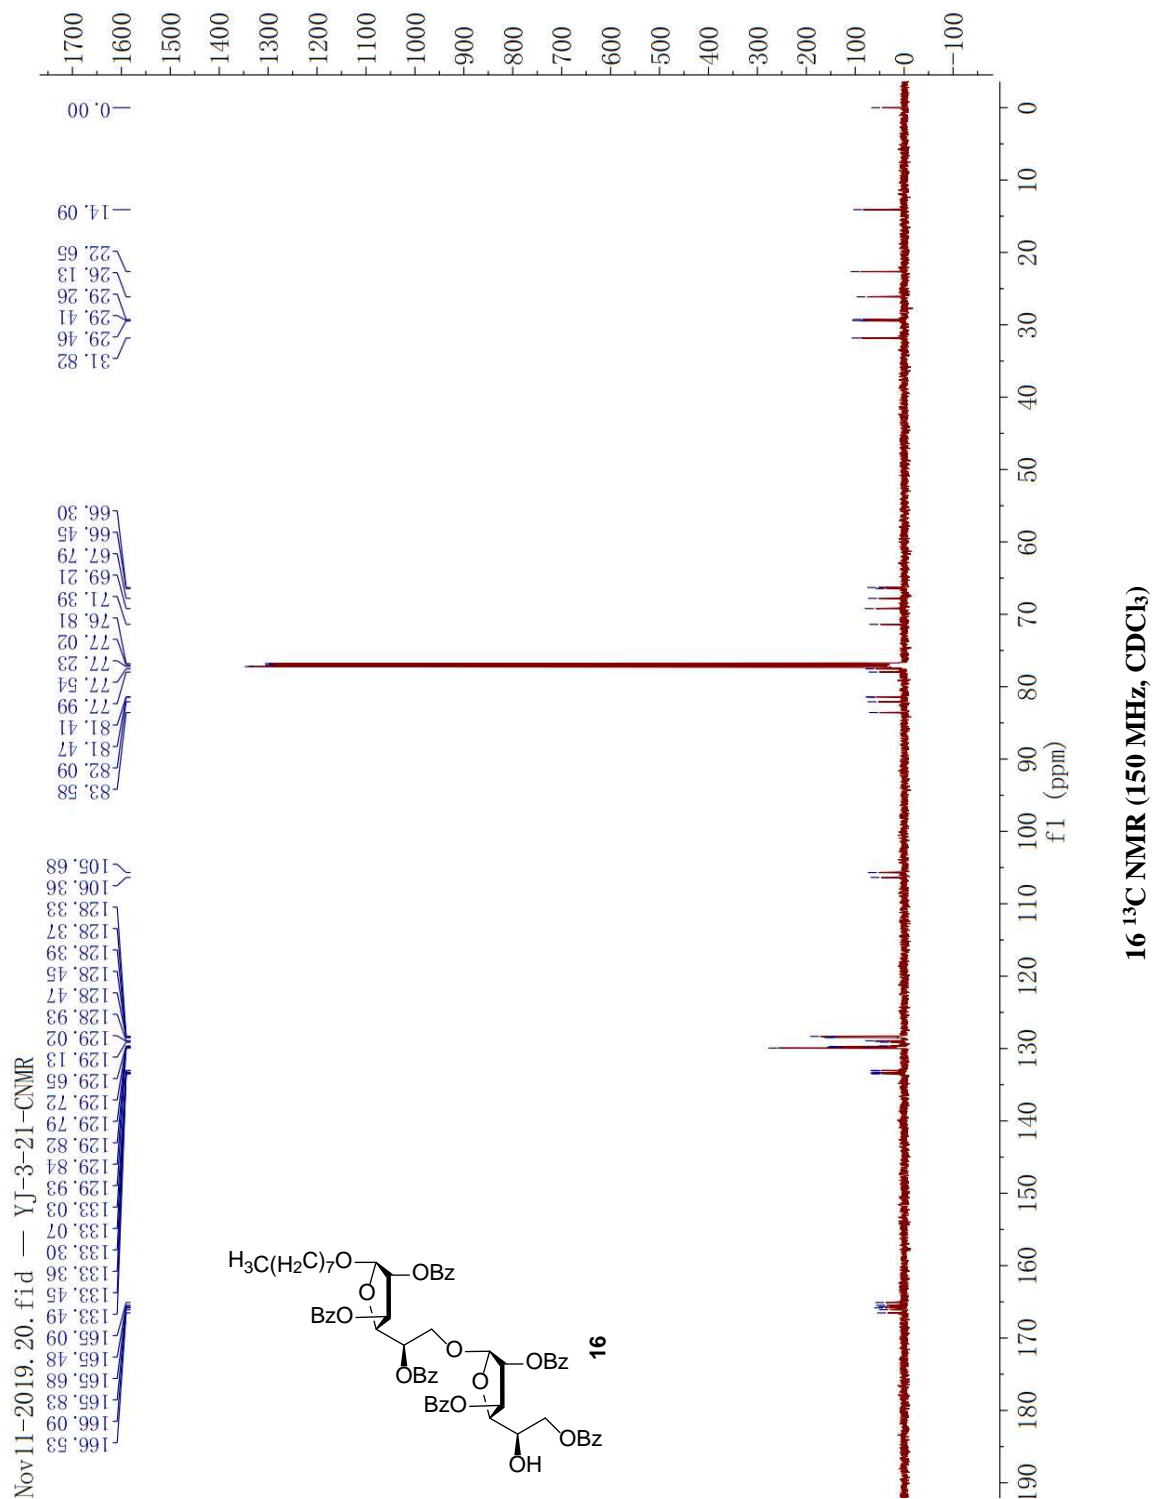

Nov11-2019. 19. fid — YJ-3-21-HNMR

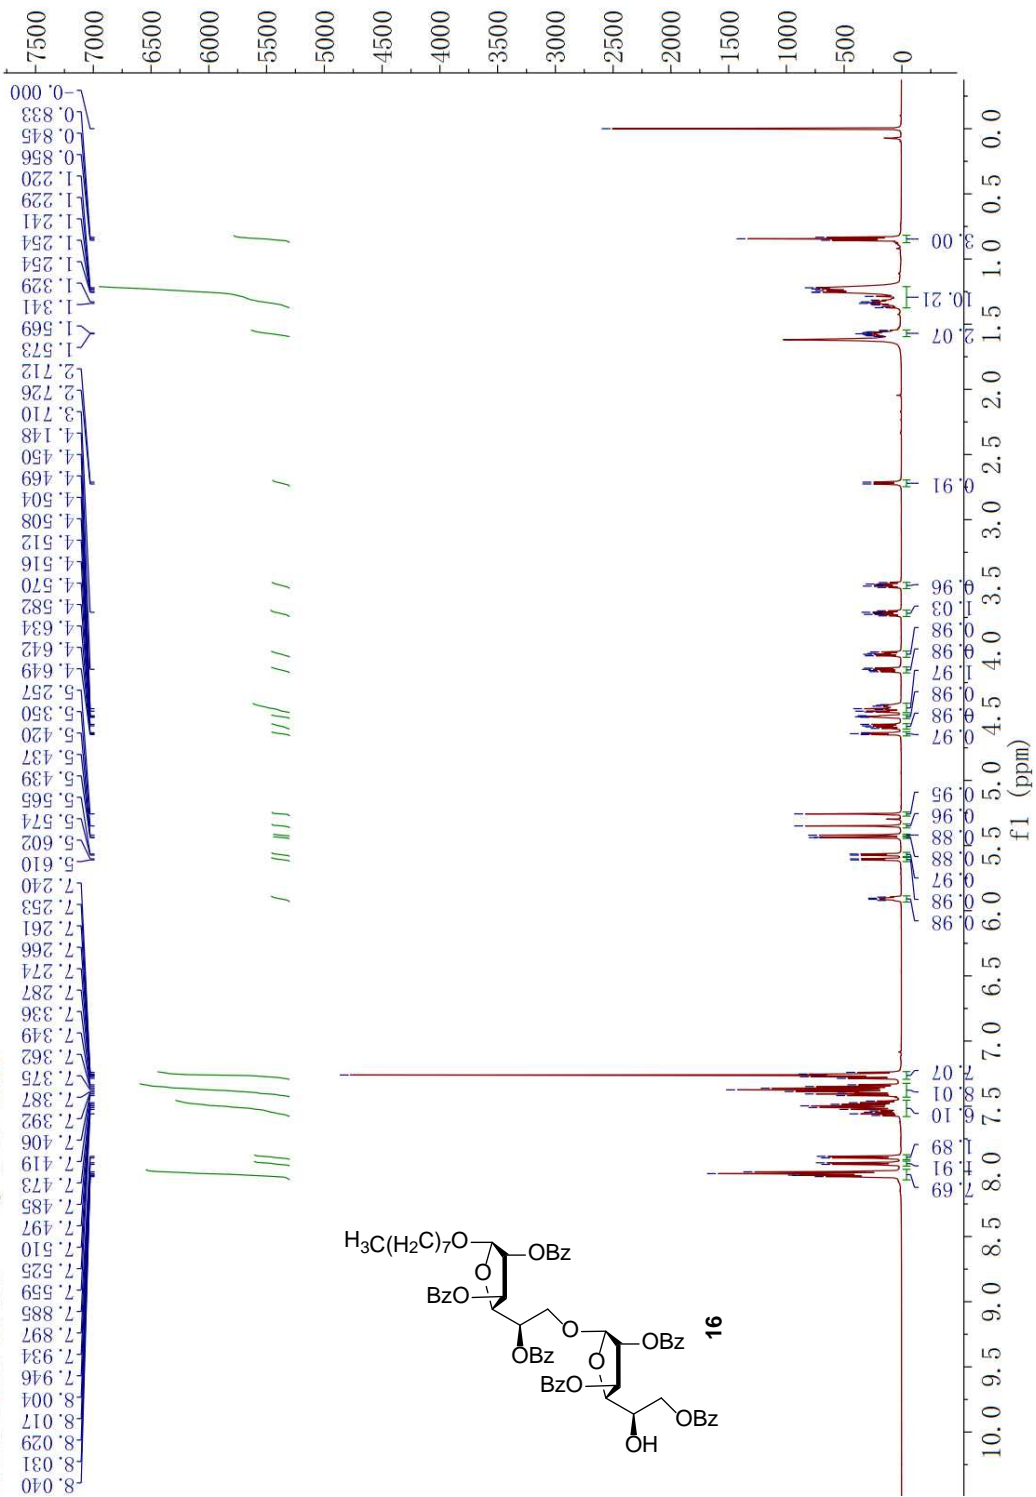

16 <sup>1</sup>H NMR (600 MHz, CDCl<sub>3</sub>)

**Octyl 2,3,5,6-tetra-O-benzoyl- $\beta$ -D-galactopyranosyl-(1 $\rightarrow$ 6)-2,3,5-tri-O-benzoyl- $\beta$ -D-galactofuranosyl-(1 $\rightarrow$ 5)-2,3,6-tri-O-benzoyl- $\beta$ -D-galactopyranosyl-(1 $\rightarrow$ 6)-2,3,5-tri-O-benzoyl- $\beta$ -D-galactofuranoside (18)**

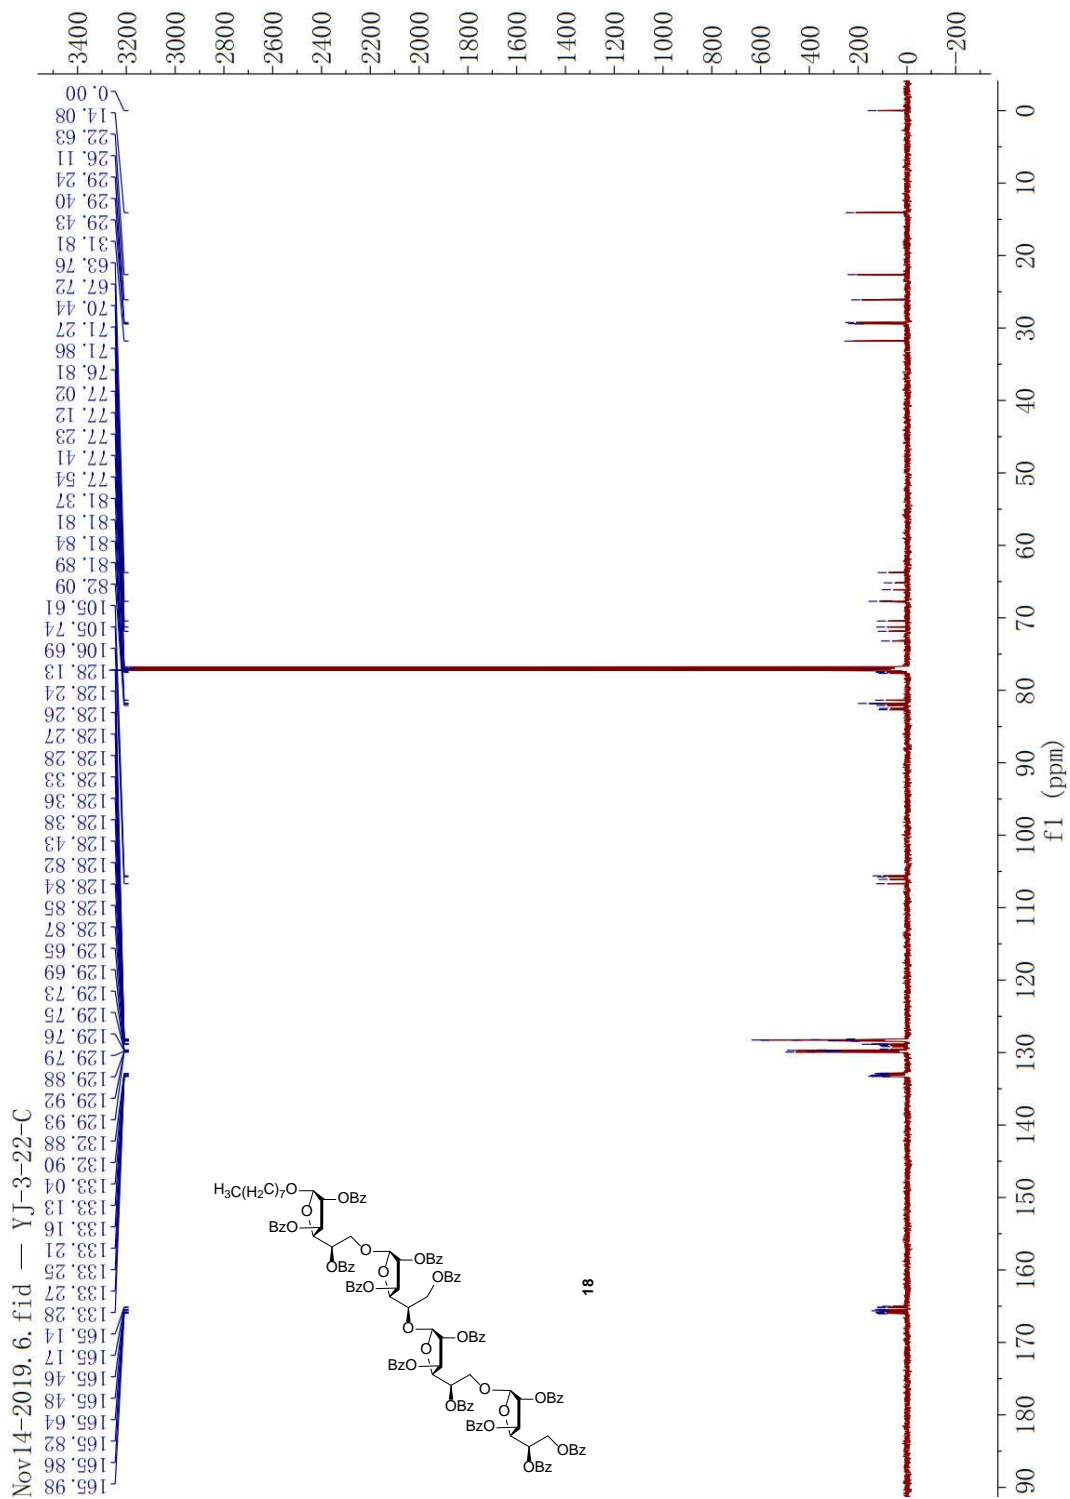

Nov14-2019. 15. fid — YJ-3-22-H

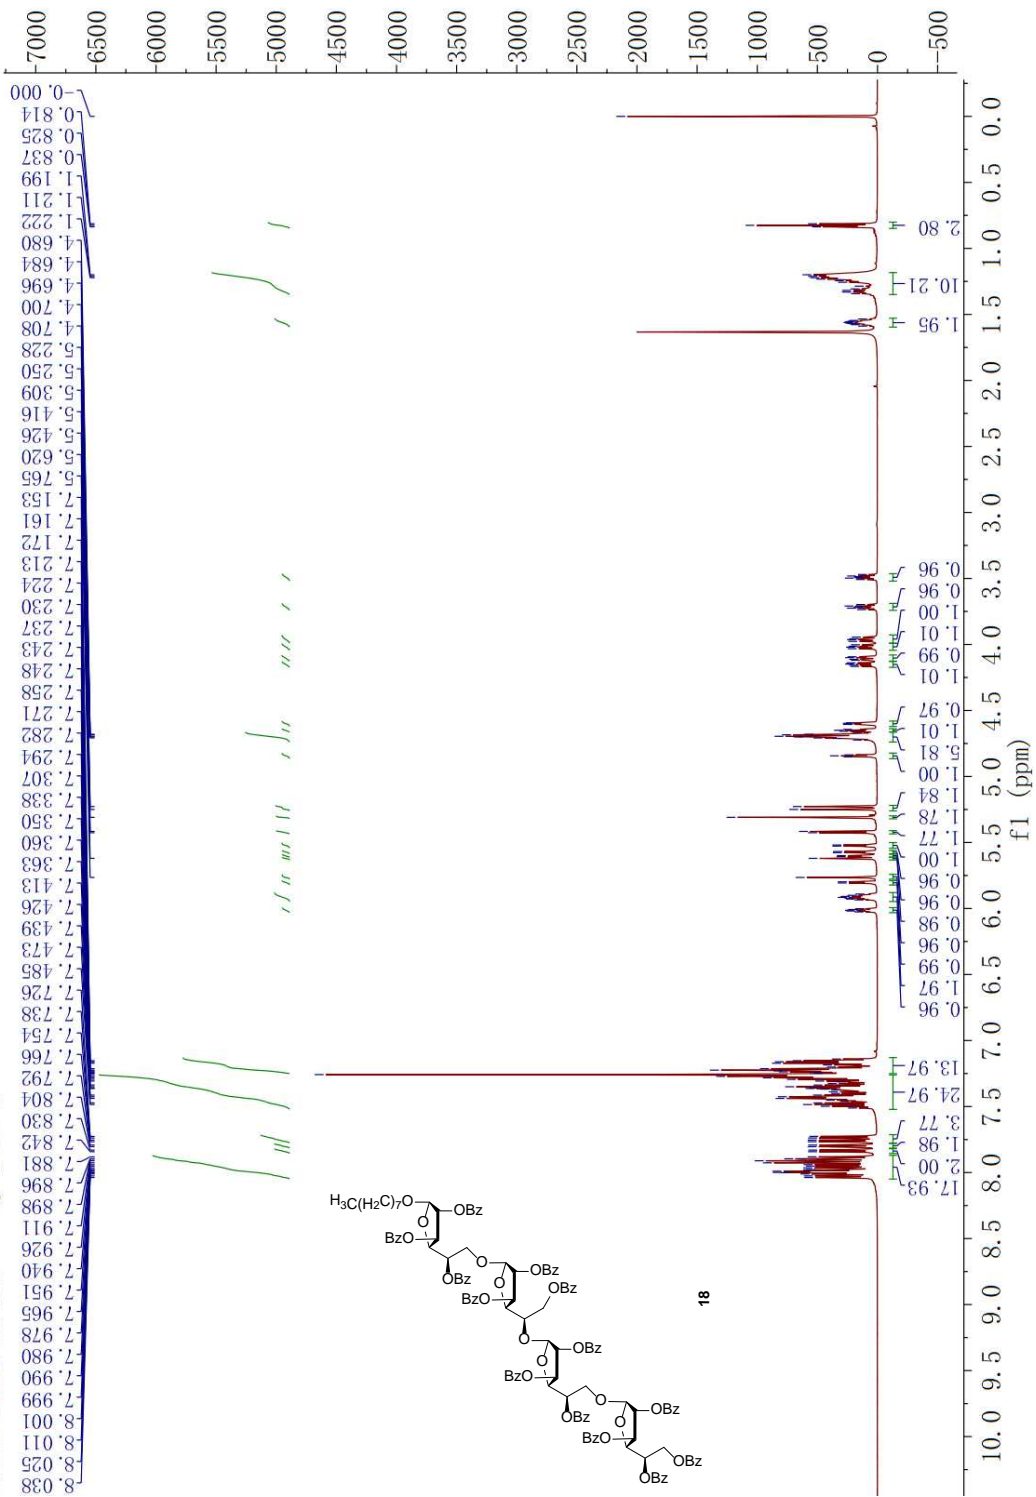

18 <sup>1</sup>H NMR (600 MHz, CDCl<sub>3</sub>)
